# Supplementary material for: Design and synthesis of tailored human caseinolytic protease P inhibitors
Source: Royal Society of Chemistry journal article supplement (doi:10.1039/c8cc05265d), 2018-01-01
Supplement: c8cc05265d1.pdf [file c8cc05265d1.pdf]

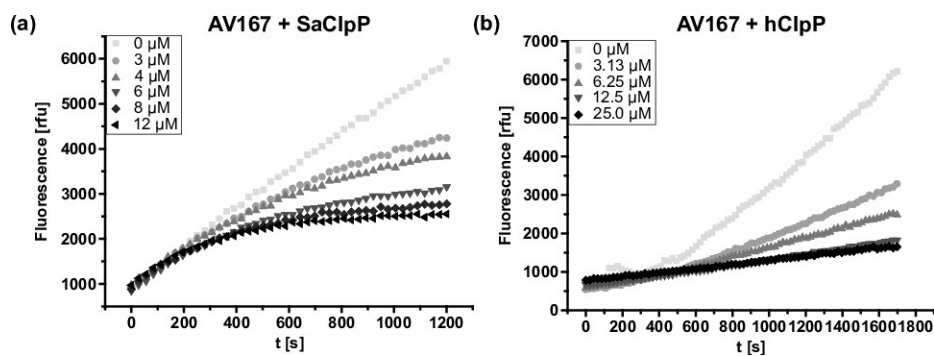

Figure S1.

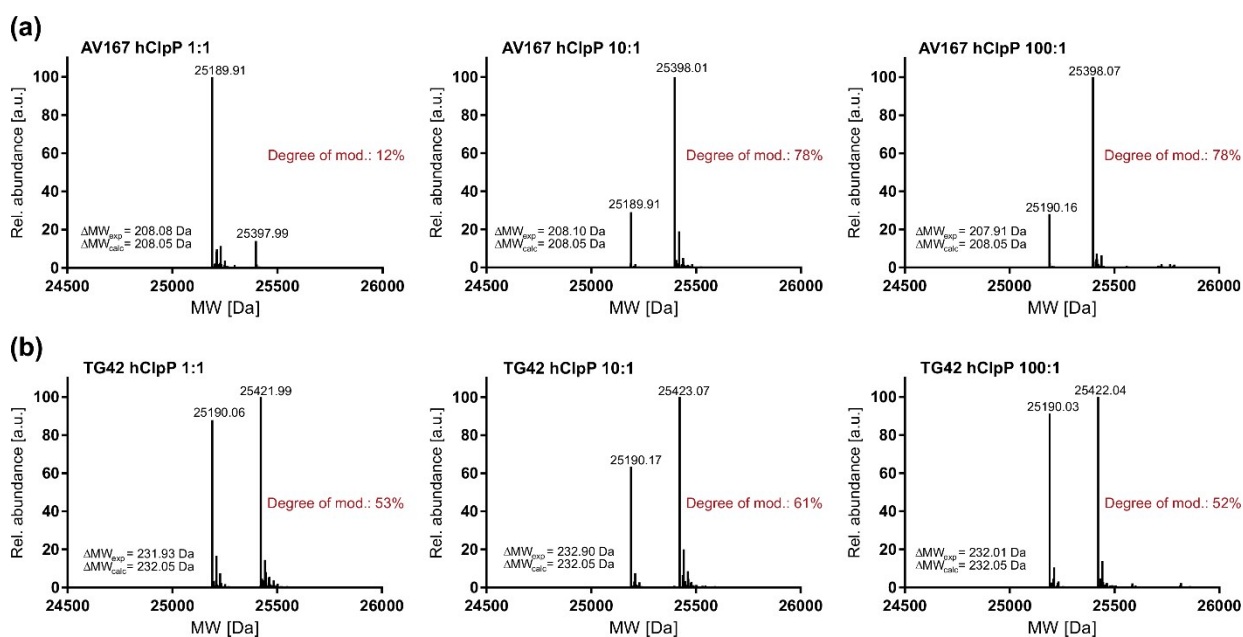

Figure S2.

### SaCIP

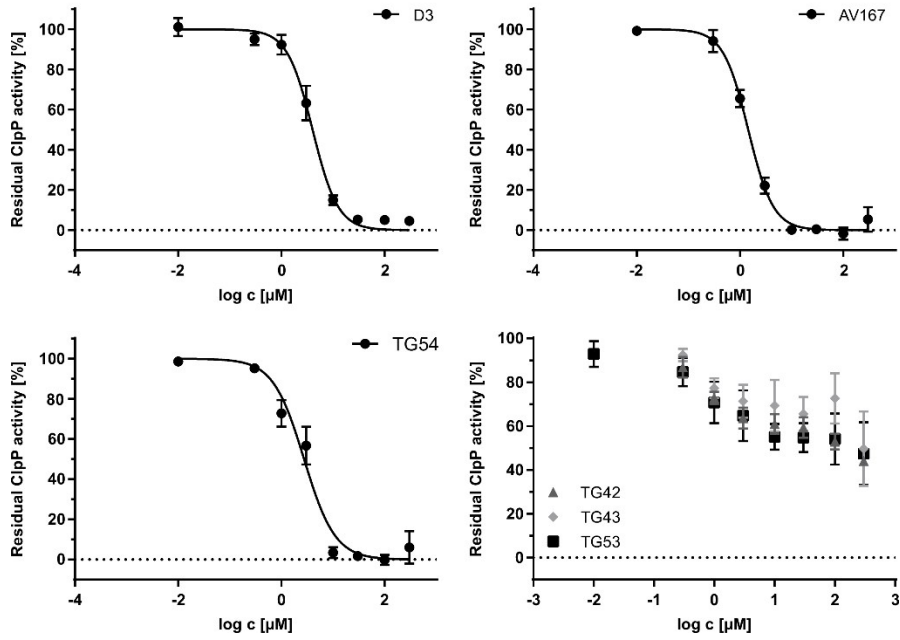

Figure S3.

### hCIP

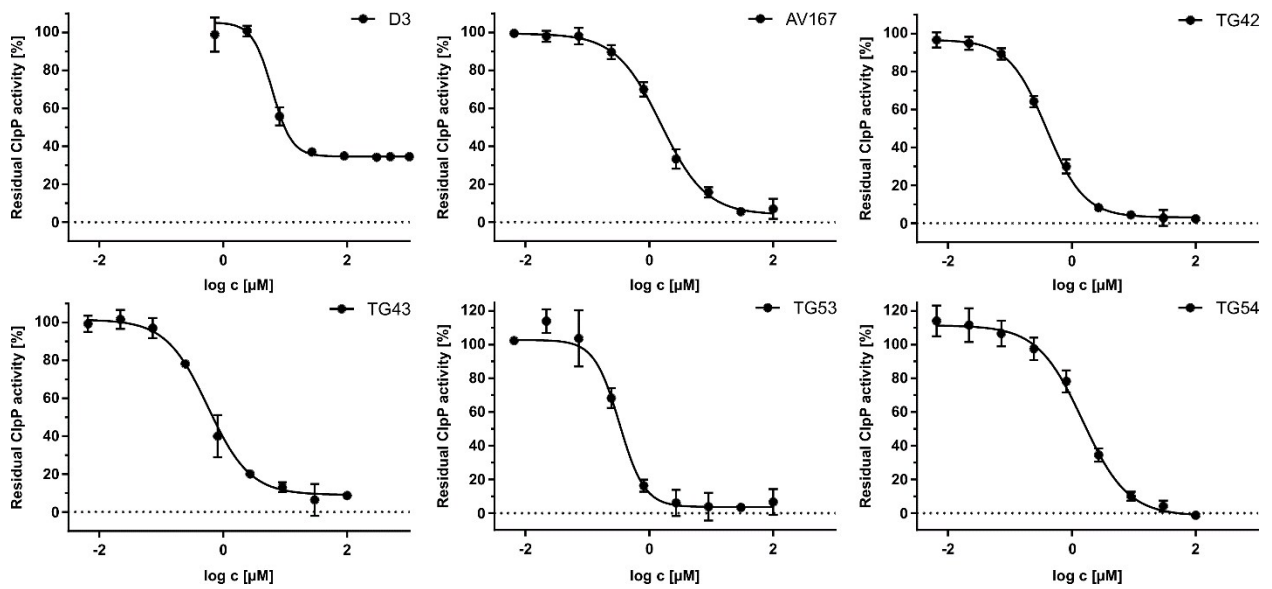

Figure S4.

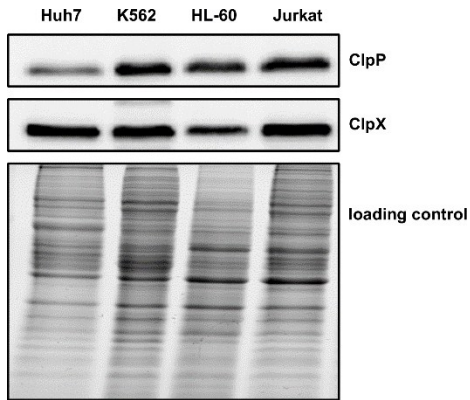

Figure S5.

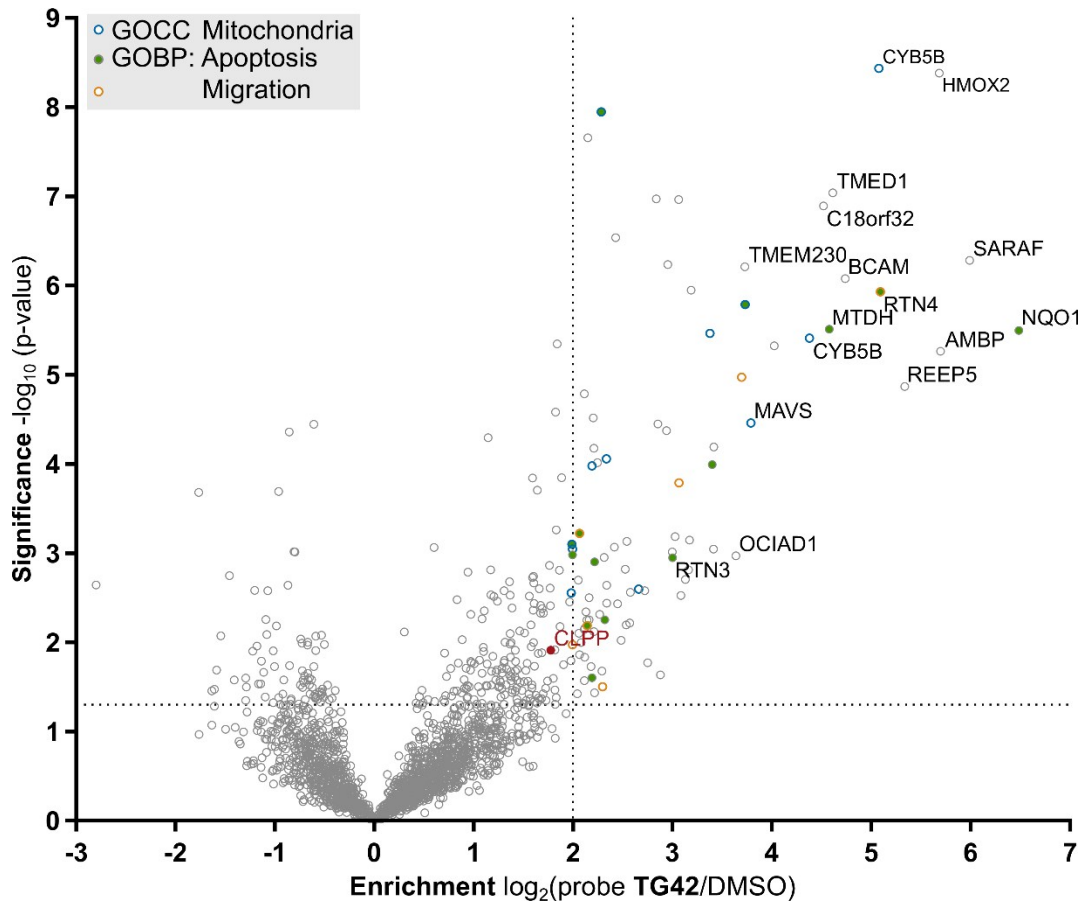

Figure S6.

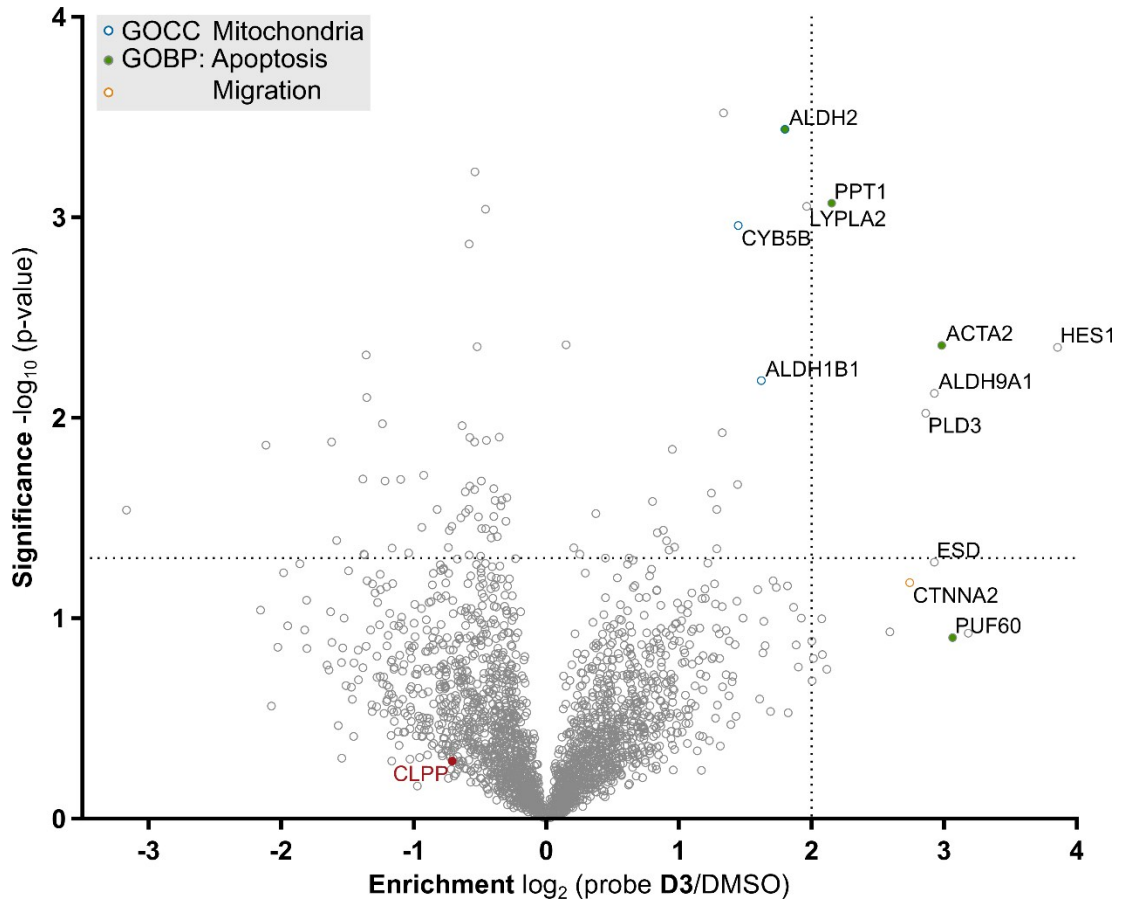

Figure S7.

**(a) *E.coli-hClpP***

MW DMSO TG49 TG50 TG52 TG51 TG42 TG53  
kDa

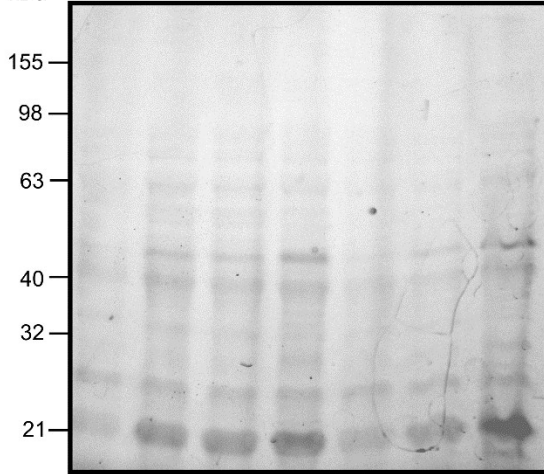

In-gel Fluorescence  
Cytosolic fraction (-IPTG)

**(b) *E.coli-hClpP***

MW DMSO TG49 TG50 TG52 TG51 TG42 TG53  
kDa

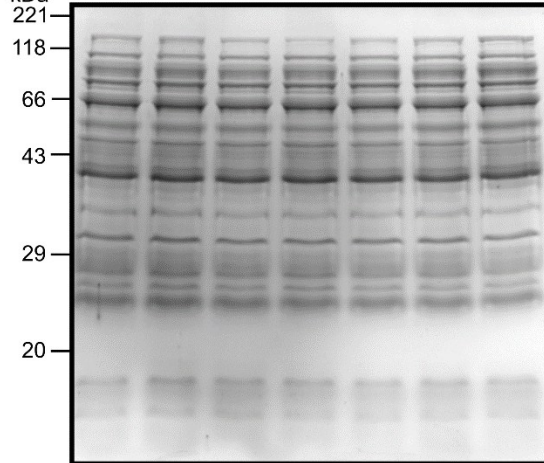

Coomassie staining  
Cytosolic fraction (+IPTG)

**(c) *E.coli-hClpP***

MW DMSO TG49 TG50 TG52 TG51 TG42 TG53  
kDa

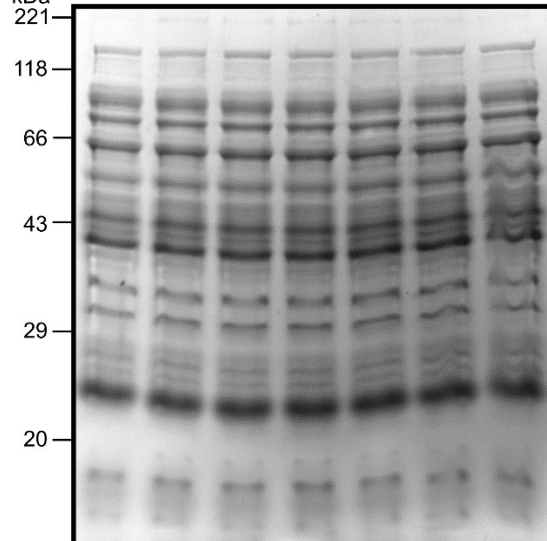

Coomassie staining  
Cytosolic fraction (-IPTG)

Figure S8.
