# Supplementary material for: Design and synthesis of tailored human caseinolytic protease P inhibitors
Source: Royal Society of Chemistry journal article supplement (doi:10.1039/c8cc05265d), 2018-01-01
Supplement: c8cc05265d3.xlsx [file c8cc05265d3.xlsx]

## Sheet: Content
Sheet	Content	Cell line	Figure
1	ABPP probe TG42	Jurkat	2e
2	ABPP probe TG42	Huh7	S5
3	ABPP probe D3	Huh7	S6

## Sheet: Jurkat (TG42_DMSO)
Majority Protein IDs	Protein Names	Gene names	log2 fold enrichment	-log10 p-value	Razor + unique peptides	Unique peptides	Unique + razor sequence coverage [%]	Unique sequence coverage [%]	Molecular weight [kDa]	Score	Intensity	MS/MS count	GOBP name	GOMF name	GOCC name	log2 LFQ intensity DMSO1	log2 LFQ intensity DMSO2	log2 LFQ intensity DMSO3	log2 LFQ intensity DMSO4	log2 LFQ intensity TG42_1	log2 LFQ intensity TG42_2	log2 LFQ intensity TG42_3	log2 LFQ intensity TG42_4
F8W8C2;Q9HBM0	Vezatin	VEZT	6.11086	4.53297	12	12	225	225	82277	14582	218850000	36	biological adhesion;cell adhesion;cell-cell adhesion;cellular process;chordate embryonic development;developmental process;embryo development;embryo development ending in birth or egg hatching		acrosomal vesicle;adherens junction;anchoring junction;cell junction;cell part;cytoplasm;cytoplasmic membrane-bounded vesicle;cytoplasmic part;cytoplasmic vesicle;integral to membrane;intracellular membrane-bounded organelle;intracellular organelle;intracellular organelle part;intracellular part;intrinsic to membrane;macromolecular complex;membrane;membrane part;membrane-bounded organelle;membran…	21.4789	20.3241	19.3375	20.2595	26.5166	26.9857	26.7943	25.5469
Q9NQC3;Q53RF4	Reticulon-4	RTN4	6.099	3.73735	12	12	172	172	12993	16984	1502300000	60	anatomical structure formation involved in morphogenesis;anatomical structure morphogenesis;angiogenesis;apoptosis;axonal fasciculation;biological regulation;cardiac epithelial to mesenchymal transition;cell death;cell migration;cell morphogenesis;cell morphogenesis involved in differentiation;cell motility;cell recognition;cell surface receptor linked signaling pathway;cellular component morphog…		cell body;cell part;cell projection;cytoplasmic part;endoplasmic reticulum;endoplasmic reticulum membrane;endoplasmic reticulum part;envelope;extracellular membrane-bounded organelle;extracellular organelle;extracellular region part;extracellular vesicular exosome;integral to endoplasmic reticulum membrane;integral to membrane;integral to organelle membrane;intracellular;intracellular membrane-bo…	22.7053	25.0228	22.7746	21.6236	29.5607	28.5053	29.2255	29.2308
A0A024R9D2;Q86UE4;E5RJU9	Protein LYRIC	MTDH	6.09421	4.8934	29	29	51	51	63836	18121	1407900000	96	biological regulation;cell junction assembly;cell junction organization;cell surface receptor linked signaling pathway;cell-cell junction assembly;cell-cell junction organization;cellular component assembly;cellular component assembly at cellular level;cellular component organization;cellular component organization at cellular level;cellular component organization or biogenesis;cellular component…	binding;double-stranded RNA binding;NF-kappaB binding;nucleic acid binding;protein binding;protein binding transcription factor activity;RNA binding;RNA polymerase II transcription factor binding;transcription coactivator activity;transcription cofactor activity;transcription factor binding;transcription factor binding transcription factor activity	apical plasma membrane;cell junction;cell part;cell-cell junction;cytoplasm;cytoplasmic part;endoplasmic reticulum;endoplasmic reticulum membrane;endoplasmic reticulum part;integral to membrane;intercellular canaliculus;intracellular membrane-bounded organelle;intracellular non-membrane-bounded organelle;intracellular organelle;intracellular organelle part;intracellular part;intrinsic to membrane…	23.878	23.9051	22.0857	23.0551	29.2214	28.8459	29.5376	29.6958
Q96A57;Q5JWB9;A0A087WTT2	Transmembrane protein 230	TMEM230	6.04673	6.66597	4	4	317	317	13188	14596	403220000	17			cell part;integral to membrane;intrinsic to membrane;membrane part	21.5197	21.4446	21.5486	21.3221	27.3733	27.4583	28.1359	27.0543
B7Z3E3;B7Z8W8;Q7RTN4;B7Z4M1;F5H891;F5GWG7;F5H617;A0A024R5C4;O95197	Reticulon;Reticulon-3	RTN3	5.87223	2.40329	2	2	52	52	10082	68064	1237400000	20	apoptosis;cell death;cellular component organization;cellular component organization at cellular level;cellular component organization or biogenesis;cellular component organization or biogenesis at cellular level;cellular process;death;endoplasmic reticulum organization;endoplasmic reticulum tubular network organization;establishment of localization;organelle organization;programmed cell death;tr…		cell part;cytoplasmic part;endoplasmic reticulum;endoplasmic reticulum membrane;endoplasmic reticulum part;extracellular membrane-bounded organelle;extracellular organelle;extracellular region part;extracellular space;extracellular vesicular exosome;Golgi apparatus part;Golgi membrane;integral to membrane;intracellular membrane-bounded organelle;intracellular organelle;intracellular organelle par…	24.3448	22.4858	20.8567	22.1347	28.2212	26.4789	27.2387	31.3722
Q9BRV8	Suppressor of IKBKE 1	SIKE1	5.78993	4.90454	9	9	391	391	23721	37661	91852000	19	defense response;immune response;immune system process;innate immune response;response to stimulus;response to stress		cell part;cytoplasmic part;cytosol;intracellular part	19.9396	19.0717	19.9678	19.4051	24.2697	25.8775	25.9334	25.4634
Q7Z434	Mitochondrial antiviral-signaling protein	MAVS	5.52331	3.86378	12	12	331	331	56527	17559	423260000	52	activation of immune response;activation of innate immune response;biological regulation;cellular process;cellular response to chemical stimulus;cellular response to dsRNA;cellular response to exogenous dsRNA;cellular response to organic substance;cellular response to stimulus;defense response;defense response to bacterium;defense response to virus;immune effector process;immune response;immune s…	binding;CARD domain binding;enzyme binding;kinase binding;molecular transducer activity;protein binding;protein domain specific binding;protein kinase binding;signal transducer activity	cell part;cytoplasmic part;integral to membrane;intracellular membrane-bounded organelle;intracellular organelle;intracellular organelle part;intracellular part;intrinsic to membrane;membrane;membrane part;membrane-bounded organelle;microbody;microbody membrane;microbody part;mitochondrial membrane;mitochondrial outer membrane;mitochondrial part;mitochondrion;organelle;organelle membrane;organell…	23.4161	22.5548	20.9995	20.801	27.5615	27.2273	27.2671	27.8087
J3KNF8		CYB5B	5.25294	6.12256	6	3	573	22	16694	21286	1148400000	115		binding;cation binding;enzyme activator activity;enzyme regulator activity;heme binding;ion binding;iron ion binding;metal ion binding;tetrapyrrole binding;transition metal ion binding	cell part;cytoplasmic part;intracellular organelle part;intracellular part;membrane;mitochondrial inner membrane;mitochondrial membrane;mitochondrial outer membrane;mitochondrial part;organelle inner membrane;organelle membrane;organelle outer membrane;organelle part;outer membrane	23.455	23.675	23.9281	23.5783	28.3536	28.7675	29.1082	29.4189
Q6IBP2;B3KSE0;P30519;Q6FHB5;I3L159;I3L1F5;Q53HF1;I3L4P8;A0A1B0GXH0;I3L463	Heme oxygenase 2	HMOX2	5.23546	7.14024	14	2	503	51	36014	2455	3736500000	120	biological regulation;catabolic process;cation homeostasis;cellular catabolic process;cellular cation homeostasis;cellular chemical homeostasis;cellular homeostasis;cellular ion homeostasis;cellular iron ion homeostasis;cellular metabolic process;cellular metal ion homeostasis;cellular nitrogen compound catabolic process;cellular nitrogen compound metabolic process;cellular process;chemical homeo…	binding;catalytic activity;cation binding;heme oxygenase (decyclizing) activity;ion binding;metal ion binding;oxidoreductase activity;oxidoreductase activity, acting on paired donors, with incorporation or reduction of molecular oxygen	cell part;cytoplasmic part;endoplasmic reticulum membrane;endoplasmic reticulum part;intracellular organelle part;intracellular part;membrane;membrane part;organelle membrane;organelle part;plasma membrane	25.0115	25.2915	25.4821	25.3554	30.4711	30.7022	30.7509	30.1581
B4DHR9;A0A0C4DFY0;Q14242;B4DT54	P-selectin glycoprotein ligand 1	SELPLG	4.75412	4.60116	4	4	91	91	3907	66968	38825000	11	biological adhesion;biological regulation;blood coagulation;cell activation;cell adhesion;cell migration;cell motility;cell-cell adhesion;cellular component movement;cellular process;cellular response to chemical stimulus;cellular response to cytokine stimulus;cellular response to interleukin-6;cellular response to organic substance;cellular response to stimulus;coagulation;hemostasis;immune syst…	binding;carbohydrate binding;protein binding;receptor binding	cell part;integral to membrane;integral to plasma membrane;intrinsic to membrane;intrinsic to plasma membrane;membrane;membrane part;plasma membrane;plasma membrane part	18.7424	19.4971	19.7295	19.0331	23.0426	24.4024	24.5923	23.9813
Q5HYD9;H3BUX2;O43169;D6RFH4	Cytochrome b5 type B	DKFZp686M0619;CYB5B	4.32836	3.21957	1	1	215	215	11873	69875	108540000	28	metabolic process;oxidation-reduction process	binding;cation binding;heme binding;ion binding;iron ion binding;metal ion binding;tetrapyrrole binding;transition metal ion binding	cell part;cytoplasmic part;integral to membrane;intracellular organelle part;intracellular part;intrinsic to membrane;membrane;membrane part;mitochondrial membrane;mitochondrial outer membrane;mitochondrial part;organelle membrane;organelle outer membrane;organelle part;outer membrane	20.5085	20.909	20.8157	22.4646	24.1196	25.5205	25.9881	26.3832
A0A024R9U3;Q9NX40;D6RBN5;D6RDK6;D6RIV2;D6RG39;D6RIT9	OCIA domain-containing protein 1	OCIAD1	4.3061	5.63764	10	10	335	335	27626	28688	693140000	34			cell part;cytoplasmic part;endosome;intracellular membrane-bounded organelle;intracellular organelle;intracellular part;membrane;membrane-bounded organelle;mitochondrion;organelle	23.7057	24.148	23.8433	23.7871	28.561	28.5661	27.9024	27.679
A5D8T4;P28908;Q6GMU3	Tumor necrosis factor receptor superfamily member 8	TNFRSF8	4.17423	4.80954	2	2	123	123	20415	58363	43061000	6	biological regulation;cellular process;cellular response to abiotic stimulus;cellular response to external stimulus;cellular response to mechanical stimulus;cellular response to stimulus;negative regulation of biological process;negative regulation of cell proliferation;negative regulation of cellular process;positive regulation of apoptosis;positive regulation of biological process;positive regu…	molecular transducer activity;receptor activity;signal transducer activity;signaling receptor activity;transmembrane signaling receptor activity	cell part;cytoplasm;extracellular membrane-bounded organelle;extracellular organelle;extracellular region part;extracellular vesicular exosome;integral to membrane;intracellular part;intrinsic to membrane;membrane;membrane part;membrane-bounded organelle;membrane-bounded vesicle;organelle;plasma membrane;vesicle	19.804	20.0331	20.3833	20.2951	23.4329	24.7039	24.7473	24.3284
Q7KYR7;C9JNC3;H7BYC3;C9IY66;A0A024R038;Q8WVV5	Butyrophilin subfamily 2 member A1;Butyrophilin subfamily 2 member A2	BTN2A1;BTN2A2	4.02191	4.23684	3	3	4	4	59632	60093	45780000	10	biological regulation;lipid metabolic process;metabolic process;negative regulation of activated T cell proliferation;negative regulation of biological process;negative regulation of cell activation;negative regulation of cell proliferation;negative regulation of cellular metabolic process;negative regulation of cellular process;negative regulation of cytokine secretion;negative regulation of imm…		cell part;extracellular membrane-bounded organelle;extracellular organelle;extracellular region part;extracellular vesicular exosome;integral to membrane;integral to plasma membrane;intrinsic to membrane;intrinsic to plasma membrane;membrane part;membrane-bounded organelle;membrane-bounded vesicle;organelle;plasma membrane part;vesicle	19.3027	20.9093	20.5861	20.2536	23.7656	24.6345	24.5828	24.1565
Q9UNK0	Syntaxin-8	STX8	3.92714	5.3519	5	5	225	225	26906	17691	74239000	13	cellular component organization;cellular component organization at cellular level;cellular component organization or biogenesis;cellular component organization or biogenesis at cellular level;cellular membrane fusion;cellular membrane organization;cellular process;early endosome to late endosome transport;endosome to lysosome transport;endosome transport;establishment of localization;establishmen…	binding;channel inhibitor activity;channel regulator activity;chloride channel inhibitor activity;chloride channel regulator activity;ion channel inhibitor activity;protein binding;SNAP receptor activity;SNARE binding;syntaxin binding	cell part;cytoplasmic part;early endosome;endoplasmic reticulum;endosomal part;endosome;endosome membrane;Golgi apparatus part;integral to membrane;integral to plasma membrane;intracellular membrane-bounded organelle;intracellular organelle;intracellular organelle part;intracellular part;intrinsic to membrane;intrinsic to plasma membrane;late endosome;late endosome membrane;lysosomal membrane;mac…	21.1011	21.0654	20.4241	20.776	25.2648	24.904	24.4089	24.4973
F5GXW5;U3KQ07;Q99622	Protein C10	C12orf57	3.88752	4.03901	2	2	351	351	99953	15087	71868000	10			cell part;cytoplasm;intracellular part	20.3372	21.101	21.2797	21.6072	24.3931	24.4259	25.4655	25.5907
O00716;Q24JQ3	Transcription factor E2F3	E2F3	3.715	3.37723	7	6	148	127	49161	20248	120930000	17	biological regulation;biosynthetic process;cell cycle;cell surface receptor linked signaling pathway;cellular biosynthetic process;cellular macromolecule metabolic process;cellular metabolic process;cellular nitrogen compound metabolic process;cellular process;cellular response to stimulus;macromolecule metabolic process;metabolic process;mitotic cell cycle;negative regulation of biological proce…	binding;core promoter binding;DNA binding;nucleic acid binding;nucleic acid binding transcription factor activity;regulatory region DNA binding;regulatory region nucleic acid binding;sequence-specific DNA binding transcription factor activity;transcription regulatory region DNA binding	cell part;cytoplasm;cytoplasmic part;Golgi apparatus;intracellular membrane-bounded organelle;intracellular organelle;intracellular organelle part;intracellular part;macromolecular complex;membrane-bounded organelle;nuclear part;nucleoplasm;nucleoplasm part;nucleus;organelle;organelle part;protein complex;transcription factor complex	21.0971	21.6283	22.6577	22.6556	24.713	25.7591	26.0537	26.3728
Q9NRX5	Serine incorporator 1	SERINC1	3.67638	5.21971	2	2	66	66	50494	10717	48966000	9	amine transport;amino acid transport;biological regulation;biosynthetic process;carboxylic acid transport;cellular biosynthetic process;cellular lipid metabolic process;cellular metabolic process;cellular process;establishment of localization;glycerolipid metabolic process;glycerophospholipid metabolic process;L-amino acid transport;lipid biosynthetic process;lipid metabolic process;L-serine tran…	active transmembrane transporter activity;amine transmembrane transporter activity;amino acid transmembrane transporter activity;carboxylic acid transmembrane transporter activity;L-amino acid transmembrane transporter activity;L-serine transmembrane transporter activity;neutral amino acid transmembrane transporter activity;organic acid transmembrane transporter activity;serine transmembrane tran…	cell part;cytoplasmic part;endoplasmic reticulum membrane;endoplasmic reticulum part;extracellular membrane-bounded organelle;extracellular organelle;extracellular region part;extracellular vesicular exosome;integral to membrane;intracellular organelle part;intracellular part;intrinsic to membrane;membrane;membrane part;membrane-bounded organelle;membrane-bounded vesicle;organelle;organelle membr…	20.5305	20.5432	20.4778	20.83	23.6063	24.513	24.6783	24.2895
E9PF16;B4DTB9;Q96CM8	Acyl-CoA synthetase family member 2, mitochondrial	ACSF2	3.65985	1.9212	2	2	47	47	63652	40242	4469700	2	carboxylic acid metabolic process;cellular ketone metabolic process;cellular lipid metabolic process;cellular metabolic process;cellular process;fatty acid metabolic process;lipid metabolic process;metabolic process;monocarboxylic acid metabolic process;organic acid metabolic process;oxoacid metabolic process;primary metabolic process;small molecule metabolic process	adenyl nucleotide binding;adenyl ribonucleotide binding;ATP binding;binding;catalytic activity;ligase activity;nucleotide binding;purine nucleotide binding;purine ribonucleoside triphosphate binding;purine ribonucleotide binding;ribonucleotide binding	cell part;cytoplasmic part;intracellular membrane-bounded organelle;intracellular organelle;intracellular part;membrane-bounded organelle;mitochondrion;organelle	21.291	17.4458	17.2876	18.2813	21.6133	21.3915	23.2341	22.7062
O75410;B4E302;E5RFM9;R4GMT7;H0YAY0;E7EVI4;B4DH49;Q5HYH0;E7ET87;B4DHF7	Transforming acidic coiled-coil-containing protein 1	TACC1;DKFZp686K18126	3.65855	4.80577	8	8	175	175	87793	46902	55025000	14	anatomical structure development;biological regulation;cell cycle;cell differentiation;cell division;cell proliferation;cellular component organization;cellular component organization at cellular level;cellular component organization or biogenesis;cellular component organization or biogenesis at cellular level;cellular developmental process;cellular localization;cellular process;cerebral cortex d…		cell part;cytoplasm;cytoplasmic part;cytoskeletal part;cytoskeleton;intermediate filament cytoskeleton;intracellular membrane-bounded organelle;intracellular non-membrane-bounded organelle;intracellular organelle;intracellular organelle part;intracellular part;membrane-bounded organelle;microtubule cytoskeleton;microtubule organizing center;non-membrane-bounded organelle;nucleus;organelle;organel…	20.502	20.302	21.2139	20.4328	23.6531	24.4359	24.4498	24.5462
Q8NDC0	MAPK-interacting and spindle-stabilizing protein-like	MAPK1IP1L	3.47105	3.16875	1	1	69	69	24269	7194	94757000	5				21.8173	21.2737	23.0158	20.8991	25.3475	25.1712	24.5015	25.8699
Q6P6B1	Glutamate-rich protein 5	ERICH5	3.43166	2.71439	12	12	38	38	39935	45824	82918000	23				21.4755	21.4879	22.1366	19.9687	25.7328	25.1392	24.3184	23.605
A0N8L7;A0A087WWC6;Q6P4I7;A0A0C4ZLG8;Q8WUD0;K7N5N2;K7N5M3;Q6NSA6;Q2YD82;Q6NSA0;Q6P4G7;Q6PIP7;Q6NSA1;Q6NS93;Q6IRV4;Q6IPR8;P01848	T-cell receptor alpha chain C region	TRAC;TRA@;TRA;B2M	3.35341	3.49213	2	2	135	135	15832	31264	20325000	5	activation of immune response;antigen receptor-mediated signaling pathway;biological regulation;cell surface receptor linked signaling pathway;cellular process;cellular response to stimulus;immune response-activating cell surface receptor signaling pathway;immune response-activating signal transduction;immune response-regulating cell surface receptor signaling pathway;immune response-regulating s…		cell part;integral to membrane;intrinsic to membrane;membrane;membrane part;plasma membrane	19.4324	19.3398	20.0475	20.2979	22.0059	23.2008	23.6412	23.6835
H0Y8H1;D6RDW7;Q9UKJ5	Cysteine-rich hydrophobic domain-containing protein 2	CHIC2	3.33588	2.19531	1	1	66	66	1599	18891	14338000	3	cellular process;establishment of localization;establishment of localization in cell;Golgi to plasma membrane transport;Golgi vesicle transport;intracellular transport;post-Golgi vesicle-mediated transport;transport;vesicle-mediated transport		cell part;cytoplasmic membrane-bounded vesicle;cytoplasmic part;cytoplasmic vesicle;Golgi apparatus part;Golgi-associated vesicle;intracellular membrane-bounded organelle;intracellular organelle;intracellular organelle part;intracellular part;membrane;membrane-bounded organelle;membrane-bounded vesicle;organelle;organelle part;plasma membrane;vesicle	18.2394	21.3229	18.4708	18.9782	22.6301	23.4809	21.5209	22.723
Q8TCD1	UPF0729 protein C18orf32	C18orf32	3.23729	1.7555	3	3	289	289	86693	85661	116110000	15	biological regulation;cellular process;cellular response to stimulus;positive regulation of biological process;positive regulation of cell communication;positive regulation of cellular process;positive regulation of I-kappaB kinase/NF-kappaB cascade;positive regulation of intracellular protein kinase cascade;positive regulation of response to stimulus;positive regulation of signal transduction;po…	molecular transducer activity;signal transducer activity		23.1825	21.3866	22.1473	21.343	23.3537	24.9101	25.0535	27.6913
A0A024R7H5;B4E0Z6;Q10589	Bone marrow stromal antigen 2	BST2	3.23661	1.73527	1	1	56	56	19769	32418	35291000	4	B cell activation;biological regulation;cell activation;cell communication;cell proliferation;cell surface receptor linked signaling pathway;cell-cell signaling;cellular process;cellular response to chemical stimulus;cellular response to cytokine stimulus;cellular response to organic substance;cellular response to stimulus;cellular response to type I interferon;cytokine-mediated signaling pathway…	binding;endopeptidase inhibitor activity;endopeptidase regulator activity;enzyme inhibitor activity;enzyme regulator activity;identical protein binding;metalloendopeptidase inhibitor activity;metalloenzyme inhibitor activity;metalloenzyme regulator activity;molecular transducer activity;peptidase inhibitor activity;peptidase regulator activity;protein binding;protein dimerization activity;protein…	anchored to membrane;apical plasma membrane;cell part;cell surface;cytoplasm;cytoplasmic part;endosome;extracellular membrane-bounded organelle;extracellular organelle;extracellular region part;extracellular vesicular exosome;Golgi apparatus;integral to membrane;integral to plasma membrane;intracellular;intracellular membrane-bounded organelle;intracellular organelle;intracellular part;intrinsic …	20.809	22.4325	18.2752	22.0847	23.1142	24.1578	24.564	24.7119
J3QL56;O75880	Protein SCO1 homolog, mitochondrial	SCO1	3.18388	2.81241	2	2	89	89	30178	2824	51130000	5	biological regulation;cation homeostasis;cation transport;cellular cation homeostasis;cellular chemical homeostasis;cellular component assembly;cellular component assembly at cellular level;cellular component organization;cellular component organization at cellular level;cellular component organization or biogenesis;cellular component organization or biogenesis at cellular level;cellular copper i…	binding;cation binding;copper ion binding;ion binding;metal ion binding;transition metal ion binding	cell part;contractile fiber;cytoplasmic part;intracellular membrane-bounded organelle;intracellular non-membrane-bounded organelle;intracellular organelle;intracellular organelle part;intracellular part;membrane;membrane-bounded organelle;mitochondrial inner membrane;mitochondrial membrane;mitochondrial part;mitochondrion;myofibril;non-membrane-bounded organelle;organelle;organelle inner membrane…	21.0871	20.6223	20.9741	22.9687	23.9663	24.9878	24.9657	24.4679
Q96LJ7;H0YNC2	Dehydrogenase/reductase SDR family member 1	DHRS1	3.15561	3.57353	4	4	211	211	33909	20321	48981000	10		catalytic activity;oxidoreductase activity	cell part;cytoplasmic part;endoplasmic reticulum;intracellular membrane-bounded organelle;intracellular organelle;intracellular organelle part;intracellular part;membrane;membrane-bounded organelle;mitochondrial inner membrane;mitochondrial membrane;mitochondrial part;organelle;organelle inner membrane;organelle membrane;organelle part	20.6704	20.0245	21.4391	21.3799	24.5984	23.6786	24.2866	23.5727
V9HWJ7;Q53FI1;A0A024RDT4;P13796;Q59GX5	Plastin-2	HEL-S-37;LCP1	3.14902	5.98406	34	34	557	557	70289	32331	28523000000	552	actin cytoskeleton organization;actin filament bundle assembly;actin filament organization;actin filament-based process;anatomical structure development;anatomical structure morphogenesis;biological regulation;bone development;cell activation;cell activation involved in immune response;cell migration;cell motility;cellular component assembly;cellular component assembly at cellular level;cellular …	actin binding;actin filament binding;binding;calcium ion binding;cation binding;cytoskeletal protein binding;enzyme binding;GTPase binding;ion binding;metal ion binding;protein binding;structural constituent of cytoskeleton;structural molecule activity	actin cytoskeleton;actin filament;actin filament bundle;adherens junction;anchoring junction;brush border;cell junction;cell part;cell projection;cell projection membrane;cell projection part;cell-substrate adherens junction;cell-substrate junction;cytoplasm;cytoplasmic part;cytoskeletal part;cytoskeleton;cytosol;extracellular membrane-bounded organelle;extracellular organelle;extracellular regio…	30.2665	30.1881	30.1182	30.1218	33.7087	33.1432	33.4225	33.0161
P49069	Calcium signal-modulating cyclophilin ligand	CAMLG	3.0593	3.20328	6	6	294	294	32952	66851	207120000	24	biological regulation;cell surface receptor linked signaling pathway;cellular macromolecule metabolic process;cellular metabolic process;cellular process;cellular response to stimulus;defense response;enzyme linked receptor protein signaling pathway;epidermal growth factor receptor signaling pathway;macromolecule metabolic process;metabolic process;receptor metabolic process;receptor recycling;re…		cell part;cytoplasmic part;endoplasmic reticulum;integral to membrane;intracellular membrane-bounded organelle;intracellular organelle;intracellular part;intrinsic to membrane;membrane;membrane part;membrane-bounded organelle;organelle	23.5452	23.4762	23.0795	21.9814	26.6309	26.2124	26.2525	25.2236
Q4LE41;Q92854;E9PFD9;B7Z9Z2;B4DER0;A0A024R243	Semaphorin-4D	SEMA4D variant protein;SEMA4D;hCG_1985052	3.03934	4.8363	2	2	3	3	97152	65854	60695000	13	axon guidance;biological adhesion;biological regulation;cell adhesion;cell surface receptor linked signaling pathway;cell-cell adhesion;cellular process;cellular response to stimulus;chemotaxis;developmental process;homotypic cell-cell adhesion;immune response;immune system process;leukocyte aggregation;leukocyte cell-cell adhesion;locomotion;multicellular organismal development;multicellular org…	binding;molecular transducer activity;protein binding;receptor activity;receptor binding;semaphorin receptor binding;signal transducer activity;signaling receptor activity;transmembrane signaling receptor activity	cell part;extracellular region part;extracellular space;integral to membrane;integral to plasma membrane;intrinsic to membrane;intrinsic to plasma membrane;membrane;membrane part;plasma membrane;plasma membrane part	21.1627	21.6007	21.7444	21.4646	24.0905	25.0446	24.6419	24.3528
Q9H6L5	Protein FAM134B	FAM134B	2.95253	4.08376	3	3	141	141	5468	26671	35892000	13	multicellular organismal process;neurological system process;sensory perception;sensory perception of pain;system process		cell part;cis-Golgi network;cytoplasmic part;Golgi apparatus;Golgi apparatus part;integral to membrane;intracellular membrane-bounded organelle;intracellular organelle;intracellular organelle part;intracellular part;intrinsic to membrane;membrane part;membrane-bounded organelle;organelle;organelle part	19.8851	20.4833	21.1341	21.0782	23.7415	23.2975	23.8006	23.5512
A0A024R7P2;B7Z6M0;Q14318;A0A0A0MTJ1	Peptidyl-prolyl cis-trans isomerase FKBP8	FKBP8	2.92769	4.95564	10	1	274	19	44561	47513	553850000	40	anatomical structure development;apoptosis;biological regulation;camera-type eye development;cell death;cell fate specification;cell surface receptor linked signaling pathway;cellular developmental process;cellular macromolecule metabolic process;cellular metabolic process;cellular process;cellular protein metabolic process;cellular response to stimulus;chaperone-mediated protein folding;death;de…	binding;catalytic activity;cation binding;cis-trans isomerase activity;drug binding;FK506 binding;identical protein binding;ion binding;isomerase activity;macrolide binding;metal ion binding;peptidyl-prolyl cis-trans isomerase activity;protein binding	cell part;cytoplasmic part;endoplasmic reticulum membrane;endoplasmic reticulum part;integral to endoplasmic reticulum membrane;integral to membrane;integral to organelle membrane;intracellular organelle part;intracellular part;intrinsic to endoplasmic reticulum membrane;intrinsic to membrane;intrinsic to organelle membrane;membrane;membrane part;mitochondrial membrane;mitochondrial part;organell…	24.6388	24.6564	24.7175	24.8644	27.2891	28.0329	28.0009	27.2649
A0A024QYX3;P98179	RNA-binding protein 3	RBM3	2.92741	3.4659	2	2	14	14	1717	62297	21189000	6	biological regulation;biosynthetic process;cellular biosynthetic process;cellular macromolecule biosynthetic process;cellular macromolecule metabolic process;cellular metabolic process;cellular nitrogen compound metabolic process;cellular process;cellular protein metabolic process;cellular response to chemical stimulus;cellular response to dsRNA;cellular response to organic substance;cellular res…	binding;nucleic acid binding;nucleotide binding;ribonucleoprotein binding;ribosomal large subunit binding;RNA binding	cell part;cell projection;cytoplasm;dendrite;intracellular membrane-bounded organelle;intracellular organelle;intracellular part;membrane-bounded organelle;neuron projection;nucleus;organelle	19.6595	20.0678	20.0868	21.0826	22.377	23.4822	23.2445	23.5026
O94919	Endonuclease domain-containing 1 protein	ENDOD1	2.92282	3.54117	7	7	174	174	55016	51423	308560000	27		binding;catalytic activity;cation binding;endonuclease activity;hydrolase activity;hydrolase activity, acting on ester bonds;ion binding;metal ion binding;nuclease activity;nucleic acid binding	cell part;extracellular membrane-bounded organelle;extracellular organelle;extracellular region part;extracellular vesicular exosome;membrane;membrane-bounded organelle;membrane-bounded vesicle;organelle;vesicle	23.736	23.7095	23.5688	23.7324	27.1951	27.1193	26.6068	25.5168
A0A024R3W2;Q15388	Mitochondrial import receptor subunit TOM20 homolog	TOMM20	2.90955	1.80806	2	2	172	172	16298	7864	352970000	7	cellular macromolecule metabolic process;cellular metabolic process;cellular process;cellular protein metabolic process;establishment of localization;establishment of localization in cell;establishment of protein localization;establishment of protein localization in mitochondrion;establishment of protein localization to organelle;intracellular protein transport;intracellular transport;macromolecu…	active transmembrane transporter activity;binding;macromolecule transmembrane transporter activity;P-P-bond-hydrolysis-driven protein transmembrane transporter activity;P-P-bond-hydrolysis-driven transmembrane transporter activity;primary active transmembrane transporter activity;protein binding;protein transmembrane transporter activity;protein transporter activity;substrate-specific transmembra…	cell part;cytoplasmic part;endoplasmic reticulum part;ER-mitochondrion membrane contact site;integral to membrane;intracellular membrane-bounded organelle;intracellular organelle;intracellular organelle part;intracellular part;intrinsic to membrane;macromolecular complex;membrane part;membrane-bounded organelle;mitochondrial membrane part;mitochondrial outer membrane translocase complex;mitochond…	25.3728	25.2239	21.748	24.2986	26.5906	26.7554	27.524	27.4114
F5H8A0;Q86TN4;F5H6B6;A0A024R5C2	tRNA 2-phosphotransferase 1	TRPT1	2.89721	3.67384	2	2	89	89	20615	26167	15771000	4	biological regulation;cellular macromolecule metabolic process;cellular metabolic process;cellular nitrogen compound metabolic process;cellular process;macromolecule metabolic process;metabolic process;ncRNA metabolic process;ncRNA processing;nitrogen compound metabolic process;nucleic acid metabolic process;nucleobase-containing compound metabolic process;primary metabolic process;regulation of …	2'-phosphotransferase activity;catalytic activity;phosphotransferase activity, alcohol group as acceptor;transferase activity;transferase activity, transferring phosphorus-containing groups;tRNA 2'-phosphotransferase activity		19.3997	19.8208	19.7839	20.2669	21.7714	23.0348	23.1536	22.9004
A0A1W2PRV5;E7EQZ4;Q16637;B4DP61;A0A076L8Z0	Survival motor neuron protein	SMN1;SMN2	2.88546	4.78391	6	6	273	273	30415	37804	110150000	15	anatomical structure development;cellular component assembly;cellular component assembly at cellular level;cellular component organization;cellular component organization at cellular level;cellular component organization or biogenesis;cellular component organization or biogenesis at cellular level;cellular macromolecular complex assembly;cellular macromolecular complex subunit organization;cellul…	binding;identical protein binding;nucleic acid binding;protein binding;RNA binding	Cajal body;cell part;contractile fiber part;cytoplasm;cytoplasmic part;cytosol;intracellular membrane-bounded organelle;intracellular organelle;intracellular organelle part;intracellular part;macromolecular complex;membrane-bounded organelle;nuclear body;nuclear part;nucleoplasm;nucleoplasm part;nucleus;organelle;organelle part;protein complex;ribonucleoprotein complex;SMN complex;SMN-Sm protein …	22.3556	22.0493	22.9668	22.3957	25.5403	25.0651	25.5648	25.139
C7C5T7;A0A1W2PQT7;A0A024QZD6;O43561;H3BQD8	Linker for activation of T-cells family member 1	LAT	2.87574	3.48731	4	4	373	373	26949	46005	75506000	8	activation of immune response;antigen receptor-mediated signaling pathway;biological regulation;blood coagulation;calcium-mediated signaling;cell activation;cell activation involved in immune response;cell surface receptor linked signaling pathway;cellular process;cellular response to stimulus;coagulation;defense response;establishment of localization;establishment of localization in cell;exocyto…	binding;binding, bridging;enzyme binding;kinase binding;protein binding;protein binding, bridging;protein kinase binding;SH3/SH2 adaptor activity;signaling adaptor activity	cell junction;cell part;cell-cell junction;cytoplasmic part;immunological synapse;integral to membrane;intracellular membrane-bounded organelle;intracellular organelle;intracellular organelle part;intracellular part;intrinsic to membrane;lysosome;lytic vacuole;macromolecular complex;mast cell granule;membrane;membrane part;membrane raft;membrane-bounded organelle;nuclear part;organelle;organelle …	21.9391	22.4637	22.1121	21.139	25.4339	24.3793	25.0495	24.2942
Q6FG93;O95183	Vesicle-associated membrane protein 5	VAMP5	2.83842	1.69021	2	2	172	172	12805	78819	12837000	4	anatomical structure development;biological regulation;cell differentiation;cellular component organization;cellular component organization at cellular level;cellular component organization or biogenesis;cellular component organization or biogenesis at cellular level;cellular developmental process;cellular membrane fusion;cellular membrane organization;cellular process;developmental process;estab…	binding;protein binding;SNAP receptor activity;SNARE binding	cell junction;cell part;cell surface;cell-cell contact zone;cell-cell junction;clathrin-coated vesicle;coated vesicle;cytoplasmic membrane-bounded vesicle;cytoplasmic part;cytoplasmic vesicle;cytoplasmic vesicle membrane;cytoplasmic vesicle part;endosome;extracellular membrane-bounded organelle;extracellular organelle;extracellular region part;extracellular vesicular exosome;Golgi apparatus part;…	18.5506	20.6899	18.4843	21.7951	21.5655	22.9059	23.2999	23.1022
Q8TB01;Q6NWZ1;A0A024RBH2;Q07065;B3KVX6	Cytoskeleton-associated protein 4	CKAP4	2.83682	5.98576	18	18	364	364	6206	89668	394100000	56			cell part;cytoplasmic part;cytoskeleton;endoplasmic reticulum;endoplasmic reticulum membrane;endoplasmic reticulum part;extracellular membrane-bounded organelle;extracellular organelle;extracellular region part;extracellular vesicular exosome;integral to membrane;intracellular membrane-bounded organelle;intracellular non-membrane-bounded organelle;intracellular organelle;intracellular organelle p…	24.3497	24.2546	24.0486	23.9179	26.885	27.1644	27.1356	26.7331
Q9Y3P8;I3RY38;A0A087WXW3	Signaling threshold-regulating transmembrane adapter 1	SIT1;SIT-R	2.8294	4.17487	6	6	388	388	21126	31069	107560000	25	biological regulation;cellular process;cellular response to stimulus;immune system process;regulation of biological process;regulation of cell activation;regulation of cellular process;regulation of immune system process;regulation of leukocyte activation;regulation of lymphocyte activation;regulation of T cell activation;response to stimulus;signal transduction	binding;enzyme binding;kinase binding;protein binding;protein domain specific binding;SH2 domain binding	cell part;extracellular membrane-bounded organelle;extracellular organelle;extracellular region part;extracellular vesicular exosome;integral to membrane;integral to plasma membrane;intrinsic to membrane;intrinsic to plasma membrane;membrane;membrane part;membrane-bounded organelle;membrane-bounded vesicle;organelle;plasma membrane;plasma membrane part;vesicle	22.4234	21.9779	22.5446	22.4428	25.5166	24.7452	25.7293	24.7153
A0A0J9YYE9;P01850;A0A0C4ZKA8;A0A0G2JMB4;A0A075B6S1;A0A5B9;A0A0C4ZPA0;K7N5M4	T-cell receptor beta-1 chain C region;T-cell receptor beta-2 chain C region	TRBC1;TRB;TRBC2;B2M	2.82194	3.1275	5	5	441	441	19769	21431	247170000	21	activation of immune response;antigen receptor-mediated signaling pathway;biological regulation;cell surface receptor linked signaling pathway;cellular process;cellular response to stimulus;immune response;immune response-activating cell surface receptor signaling pathway;immune response-activating signal transduction;immune response-regulating cell surface receptor signaling pathway;immune respo…		cell part;integral to membrane;intrinsic to membrane;membrane;membrane part;plasma membrane	24.4503	22.6558	22.6401	23.6553	26.4629	26.118	26.0174	26.0911
B3KN29;A0A024QZ22;O60831;A6NP52	PRA1 family protein 2	PRAF2	2.81386	2.9633	4	3	275	174	1929	17775	553530000	20	acidic amino acid transport;amine transport;amino acid transport;anion transport;carboxylic acid transport;establishment of localization;establishment of protein localization;ion transport;L-glutamate transport;nitrogen compound transport;organic acid transport;organic anion transport;organic substance transport;protein transport;transport		cell part;cytoplasmic part;endosomal part;endosome membrane;integral to membrane;intracellular organelle part;intracellular part;intrinsic to membrane;membrane;membrane part;organelle membrane;organelle part	25.3613	25.4453	23.6367	25.1648	27.0852	27.7392	27.9704	28.0686
B7Z6B3;B7Z2A3;B2R6C4;Q00765	Receptor expression-enhancing protein;Receptor expression-enhancing protein 5	REEP5	2.75331	3.08392	7	7	173	173	17758	35845	479580000	40			cell part;extracellular membrane-bounded organelle;extracellular organelle;extracellular region part;extracellular vesicular exosome;integral to membrane;intrinsic to membrane;membrane part;membrane-bounded organelle;membrane-bounded vesicle;organelle;vesicle	23.7195	24.3737	24.5307	23.9788	27.8615	27.2502	26.4572	26.0469
B2LYR2;P20963;H6QVQ5;Q6KAV0	T-cell surface glycoprotein CD3 zeta chain	CD247	2.75178	2.66004	5	5	56	56	11506	13231	21690000	6	activation of immune response;antigen receptor-mediated signaling pathway;biological regulation;cell surface receptor linked signaling pathway;cellular process;cellular response to stimulus;defense response;immune response;immune response-activating cell surface receptor signaling pathway;immune response-activating signal transduction;immune response-regulating cell surface receptor signaling pat…	binding;identical protein binding;molecular transducer activity;protein binding;protein dimerization activity;protein homodimerization activity;receptor activity;signal transducer activity;signaling receptor activity;transmembrane signaling receptor activity	alpha-beta T cell receptor complex;cell part;cytoplasm;integral to membrane;intracellular part;intrinsic to membrane;macromolecular complex;membrane;membrane part;plasma membrane;plasma membrane part;protein complex;receptor complex;T cell receptor complex	19.7906	18.9811	20.0339	19.8568	23.7009	21.9532	22.5634	21.4522
C9JAW5;B2R4G1;A0A024R2M9;C9JNU6;Q9Y241	HIG1 domain family member 1A, mitochondrial	HIGD1A	2.74044	3.44905	1	1	217	217	88131	68753	48203000	8	biological regulation;metabolic process;negative regulation of apoptosis;negative regulation of biological process;negative regulation of cell death;negative regulation of cellular process;negative regulation of programmed cell death;oxidation-reduction process;regulation of apoptosis;regulation of biological process;regulation of cell death;regulation of cellular process;regulation of programmed…		cell part;cytoplasmic part;integral to membrane;intracellular organelle part;intracellular part;intrinsic to membrane;macromolecular complex;membrane;membrane part;mitochondrial inner membrane;mitochondrial membrane;mitochondrial part;organelle inner membrane;organelle membrane;organelle part;protein complex;respiratory chain	21.2883	21.2167	21.6495	22.1366	23.5072	24.1417	24.6668	24.9371
B8XPJ7;B8XPJ8;A0A140VJG8;P21964;E7EMS6;E7EUU8	Catechol O-methyltransferase	COMT	2.71851	4.42907	5	5	271	271	24479	15334	659280000	19	alcohol catabolic process;alcohol metabolic process;amine catabolic process;amine metabolic process;behavior;benzene-containing compound metabolic process;biological regulation;biosynthetic process;catabolic process;catecholamine catabolic process;catecholamine metabolic process;catechol-containing compound catabolic process;catechol-containing compound metabolic process;cell communication;cell-c…	binding;catalytic activity;catechol O-methyltransferase activity;cation binding;ion binding;magnesium ion binding;metal ion binding;methyltransferase activity;O-methyltransferase activity;S-adenosylmethionine-dependent methyltransferase activity;transferase activity;transferase activity, transferring one-carbon groups	axon;cell body;cell part;cell projection;cell projection part;cytoplasmic part;cytosol;dendritic spine;extracellular membrane-bounded organelle;extracellular organelle;extracellular region part;extracellular vesicular exosome;integral to membrane;intracellular membrane-bounded organelle;intracellular organelle;intracellular part;intrinsic to membrane;membrane;membrane part;membrane-bounded organe…	25.3392	25.4654	24.9783	25.5795	27.4505	28.455	28.1095	28.2215
A8K287;O00161;A0A024R9R8;H3BNE1;H3BR18;H3BM38;H3BPJ0	Synaptosomal-associated protein;Synaptosomal-associated protein 23	SNAP23	2.68991	2.8224	9	9	555	555	23354	57411	135290000	17	amine transport;biological regulation;cellular component assembly;cellular component assembly at cellular level;cellular component organization;cellular component organization at cellular level;cellular component organization or biogenesis;cellular component organization or biogenesis at cellular level;cellular macromolecular complex assembly;cellular macromolecular complex subunit organization;c…	binding;protein binding;SNAP receptor activity;SNARE binding;syntaxin binding	adherens junction;anchoring junction;azurophil granule;cell junction;cell part;cell projection;cell-substrate adherens junction;cell-substrate junction;cytoplasm;cytoplasmic membrane-bounded vesicle;cytoplasmic part;cytoplasmic vesicle;extracellular membrane-bounded organelle;extracellular organelle;extracellular region part;extracellular vesicular exosome;focal adhesion;intracellular membrane-bo…	22.817	22.2623	22.5868	23.7628	25.5552	24.5315	25.8571	26.2448
M0R208;Q16740	ATP-dependent Clp protease proteolytic subunit;ATP-dependent Clp protease proteolytic subunit, mitochondrial	CLPP	2.63951	3.39565	8	8	511	511	20568	13496	1114900000	66	cellular component assembly;cellular component organization;cellular component organization or biogenesis;macromolecular complex assembly;macromolecular complex subunit organization;macromolecule metabolic process;metabolic process;primary metabolic process;protein complex assembly;protein complex subunit organization;protein homooligomerization;protein metabolic process;protein oligomerization;p…	catalytic activity;endopeptidase activity;hydrolase activity;peptidase activity;peptidase activity, acting on L-amino acid peptides;serine hydrolase activity;serine-type endopeptidase activity;serine-type peptidase activity	cell part;cytoplasmic part;endopeptidase Clp complex;intracellular membrane-bounded organelle;intracellular organelle;intracellular organelle lumen;intracellular organelle part;intracellular part;macromolecular complex;membrane-bounded organelle;membrane-enclosed lumen;mitochondrial matrix;mitochondrial part;mitochondrion;organelle;organelle lumen;organelle part;protein complex	25.3686	25.8204	26.9344	25.8573	28.8324	28.3984	28.2975	29.0103
B1ALG6		HELLS	2.5797	1.91735	2	2	146	146	22692	52945	258070000	10				22.4094	24.0649	24.3886	25.2391	25.4896	27.1055	26.4436	27.3821
B2RDT8;Q9Y5X2;C9JCB9;C9J8E6;C9J014;C9J271	Sorting nexin-8	SNX8	2.55804	1.4664	7	7	17	17	52597	33662	175370000	30	cellular component organization;cellular component organization at cellular level;cellular component organization or biogenesis;cellular component organization or biogenesis at cellular level;cellular membrane organization;cellular process;early endosome to Golgi transport;endocytosis;endosome transport;establishment of localization;establishment of localization in cell;establishment of protein l…	binding;identical protein binding;lipid binding;phosphatidylinositol binding;phospholipid binding;protein binding	cell part;cytoplasmic part;early endosome membrane;endosomal part;endosome membrane;extrinsic to membrane;intracellular membrane-bounded organelle;intracellular organelle;intracellular organelle part;intracellular part;membrane;membrane part;membrane-bounded organelle;organelle;organelle membrane;organelle part	23.9201	24.3529	22.7466	21.3071	26.6604	24.7536	24.3242	26.8206
B4DSV8;Q6FIA7;B4DPG9;Q9H3K2;Q658I8;Q9P099;B4DNL0;Q9Y6G2	Growth hormone-inducible transmembrane protein	GHITM;DKFZp566C0746	2.55641	3.084	2	2	63	63	35778	49589	75929000	4	apoptosis;cell death;cellular process;death;programmed cell death		cell part;cytoplasmic part;extracellular membrane-bounded organelle;extracellular organelle;extracellular region part;extracellular vesicular exosome;integral to membrane;intracellular organelle part;intracellular part;intrinsic to membrane;membrane;membrane part;membrane-bounded organelle;membrane-bounded vesicle;mitochondrial inner membrane;mitochondrial membrane;mitochondrial part;organelle;or…	22.7429	21.8747	22.476	22.4764	23.8532	25.1384	25.3939	25.4101
P49006	MARCKS-related protein	MARCKSL1	2.55555	3.53803	5	5	672	672	19529	112	312830000	41	biological regulation;positive regulation of biological process;positive regulation of cell proliferation;positive regulation of cellular process;regulation of biological process;regulation of cell proliferation;regulation of cellular process		cell part;cytoplasm;extracellular membrane-bounded organelle;extracellular organelle;extracellular region part;extracellular vesicular exosome;intracellular part;membrane;membrane-bounded organelle;membrane-bounded vesicle;organelle;plasma membrane;vesicle	23.9277	24.3859	24.5859	24.6995	26.1308	26.9278	27.4013	27.3613
A0A024QZT0;A0A024QZN9;P45880;A0A0A0MR02;B4DKM5	Voltage-dependent anion-selective channel protein 2	VDAC2	2.54232	5.25651	16	6	643	323	31566	32331	8851900000	222	anion transport;biological regulation;establishment of localization;ion transport;negative regulation of biological process;negative regulation of cellular component organization;negative regulation of cellular process;negative regulation of protein complex assembly;negative regulation of protein polymerization;regulation of biological process;regulation of cellular component biogenesis;regulatio…	anion channel activity;anion transmembrane transporter activity;binding;channel activity;gated channel activity;ion channel activity;ion transmembrane transporter activity;nucleotide binding;passive transmembrane transporter activity;porin activity;substrate-specific channel activity;substrate-specific transmembrane transporter activity;substrate-specific transporter activity;transmembrane transp…	cell part;cytoplasmic part;extracellular membrane-bounded organelle;extracellular organelle;extracellular region part;extracellular vesicular exosome;integral to membrane;intracellular membrane-bounded organelle;intracellular non-membrane-bounded organelle;intracellular organelle;intracellular organelle part;intracellular part;intrinsic to membrane;macromolecular complex;membrane;membrane part;me…	29.2852	28.9215	28.7168	28.9851	31.8388	31.2646	31.4165	31.558
H8Y6P7;Q9BZD3;P0CAP2;Q53ER8	Putative GRINL1B complex locus protein 2;DNA-directed RNA polymerase II subunit GRINL1A	GCOM1;GCOM2;POLR2M	2.52372	2.65585	5	5	111	111	87806	11801	59782000	18	biological regulation;cellular process;cellular response to stimulus;intracellular signal transduction;maintenance of ER location;maintenance of location;maintenance of location in cell;maintenance of organelle location;regulation of biological process;regulation of biological quality;regulation of cellular process;response to stimulus;signal transduction	catalytic activity;DNA-directed RNA polymerase activity;nucleotidyltransferase activity;RNA polymerase activity;transferase activity;transferase activity, transferring phosphorus-containing groups	cell body;cell part;DNA-directed RNA polymerase II, holoenzyme;envelope;intracellular organelle part;intracellular part;macromolecular complex;neuronal cell body;nuclear envelope;nuclear part;nucleoplasm part;organelle envelope;organelle part;protein complex	21.1939	21.6172	21.4781	21.2884	24.9218	24.3475	23.7516	22.6516
Q15154;D3DSQ0;A6NNN6;A2RUU9	Pericentriolar material 1 protein	PCM1	2.50189	4.56177	24	1	146	13	22853	10478	261200000	59	anatomical structure formation involved in morphogenesis;biological regulation;cell cycle;cell cycle process;cell projection assembly;cell projection organization;cellular component assembly;cellular component assembly at cellular level;cellular component assembly involved in morphogenesis;cellular component movement;cellular component organization;cellular component organization at cellular leve…	binding;identical protein binding;protein binding	cell part;centriolar satellite;centrosome;cytoplasm;cytoplasmic part;cytoskeletal part;cytosol;intracellular non-membrane-bounded organelle;intracellular organelle;intracellular organelle part;intracellular part;macromolecular complex;membrane;microtubule organizing center;microtubule organizing center part;non-membrane-bounded organelle;nuclear membrane;nuclear part;organelle;organelle membrane;…	23.7819	24.1752	24.3956	24.5433	26.2993	26.8076	26.8714	26.9252
K7ENI6;K7ERE1;Q8N2U0	Transmembrane protein 256	TMEM256	2.48332	3.61185	2	2	22	22	39694	51841	319140000	13			cell part;extracellular membrane-bounded organelle;extracellular organelle;extracellular region part;extracellular vesicular exosome;integral to membrane;intrinsic to membrane;membrane part;membrane-bounded organelle;membrane-bounded vesicle;organelle;vesicle	25.2186	24.3424	23.9394	24.0527	27.0617	27.1119	26.5091	26.8037
B4DE27;Q59ES3	Amino acid transporter		2.45347	2.61291	1	1	64	64	33723	22052	259080000	16		active transmembrane transporter activity;anion transmembrane transporter activity;anion:cation symporter activity;carboxylic acid transmembrane transporter activity;cation transmembrane transporter activity;dicarboxylic acid transmembrane transporter activity;inorganic cation transmembrane transporter activity;ion transmembrane transporter activity;metal ion transmembrane transporter activity;mo…	cell part;integral to membrane;intrinsic to membrane;membrane;membrane part	23.6	24.2929	24.2265	24.7418	25.8039	26.2071	26.8964	27.7677
B3KRW4;Q9H5N1;Q49AT6;B4DHR0	Rab GTPase-binding effector protein 2	RABEP2	2.44998	3.25301	3	3	72	72	63526	11941	20069000	9	cellular component organization;cellular component organization or biogenesis;cellular membrane organization;cellular process;endocytosis;establishment of localization;establishment of protein localization;membrane invagination;membrane organization;protein transport;transport;vesicle-mediated transport	enzyme activator activity;enzyme regulator activity;GTPase activator activity;GTPase regulator activity;nucleoside-triphosphatase regulator activity	cell part;cytoplasm;cytoplasmic part;early endosome;endosome;intracellular membrane-bounded organelle;intracellular organelle;intracellular part;membrane-bounded organelle;organelle	19.8898	20.3489	20.3251	20.8421	22.0373	22.5567	23.4091	23.2027
Q06945	Transcription factor SOX-4	SOX4	2.41155	2.21574	2	2	59	59	47262	36359	24809000	3	anatomical structure development;anatomical structure formation involved in morphogenesis;anatomical structure morphogenesis;ascending aorta morphogenesis;atrial septum morphogenesis;atrial septum primum morphogenesis;biological regulation;canonical Wnt receptor signaling pathway;carbohydrate homeostasis;cardiac chamber formation;cardiac chamber morphogenesis;cardiac right ventricle morphogenesis…	binding;core promoter binding;core promoter sequence-specific DNA binding;DNA binding;nucleic acid binding;nucleic acid binding transcription factor activity;protein binding transcription factor activity;regulatory region DNA binding;regulatory region nucleic acid binding;RNA polymerase II core promoter proximal region sequence-specific DNA binding transcription factor activity;RNA polymerase II …	cell part;cytoplasm;cytoplasmic part;intracellular membrane-bounded organelle;intracellular organelle;intracellular organelle part;intracellular part;membrane-bounded organelle;mitochondrion;nuclear part;nucleoplasm;nucleus;organelle;organelle part	20.6556	20.2454	20.4405	20.584	21.5199	23.9437	23.7375	22.3706
A0A024R1Q0;Q12772;B4DSU0;A0A087X1T2;G3V0I8	Sterol regulatory element-binding protein 2;Processed sterol regulatory element-binding protein 2	SREBF2	2.40464	2.52419	9	9	74	74	12369	19095	78500000	18	aging;alcohol metabolic process;anatomical structure development;biological regulation;biosynthetic process;cell communication;cell surface receptor linked signaling pathway;cellular biosynthetic process;cellular macromolecule biosynthetic process;cellular macromolecule metabolic process;cellular metabolic process;cellular nitrogen compound metabolic process;cellular process;cellular response to …	binding;chromatin binding;core promoter proximal region DNA binding;core promoter proximal region sequence-specific DNA binding;DNA binding;E-box binding;nucleic acid binding;nucleic acid binding transcription factor activity;protein binding;protein C-terminus binding;regulatory region DNA binding;regulatory region nucleic acid binding;RNA polymerase II core promoter proximal region sequence-spec…	cell part;coated vesicle membrane;cytoplasm;cytoplasmic part;cytoplasmic vesicle membrane;cytoplasmic vesicle part;cytosol;endoplasmic reticulum;endoplasmic reticulum membrane;endoplasmic reticulum part;envelope;ER to Golgi transport vesicle membrane;Golgi apparatus part;Golgi membrane;integral to membrane;intracellular membrane-bounded organelle;intracellular non-membrane-bounded organelle;intra…	21.5481	22.2849	22.9126	23.1899	23.8849	25.0261	25.2551	25.388
D6RD97;D6RJ02;D6RJF2;A0A024R094		PAIP1	2.40014	1.80125	1	1	147	147	10671	36983	33033000	8		binding;nucleic acid binding;RNA binding		22.8994	20.7992	20.401	19.6491	23.1733	22.8884	23.6233	23.6643
B7Z1Q2;A2JNH2;Q59GS9;B7Z2L1;O60861	Growth arrest-specific protein 7	MLL/GAS7;GAS7	2.3992	1.61982	1	1	38	38	34206	28546	2903700	3	actin cytoskeleton organization;actin filament bundle assembly;actin filament organization;actin filament polymerization;actin filament-based process;actin polymerization or depolymerization;anatomical structure morphogenesis;biological regulation;cell cycle arrest;cell cycle process;cell part morphogenesis;cell projection morphogenesis;cell projection organization;cellular component assembly;cel…	nucleic acid binding transcription factor activity;sequence-specific DNA binding transcription factor activity	actin filament;cell part;cell projection;cytoplasm;cytoskeletal part;intracellular organelle part;intracellular part;macromolecular complex;organelle part;protein complex;ruffle	19.7321	19.9685	19.4166	18.5657	19.7383	22.8425	21.7991	22.8998
A0A087WW23;P20292	Arachidonate 5-lipoxygenase-activating protein	ALOX5AP	2.38173	3.06256	1	1	37	37	24208	19096	98086000	2	alkene biosynthetic process;arachidonic acid metabolic process;arachidonic acid metabolite production involved in inflammatory response;biological regulation;biosynthetic process;carboxylic acid biosynthetic process;carboxylic acid metabolic process;cellular alkene metabolic process;cellular biosynthetic process;cellular component assembly;cellular component organization;cellular component organi…	arachidonate 5-lipoxygenase activity;arachidonic acid binding;binding;carboxylic acid binding;catalytic activity;dioxygenase activity;enzyme activator activity;enzyme regulator activity;fatty acid binding;icosanoid binding;icosatetraenoic acid binding;lipid binding;monocarboxylic acid binding;oxidoreductase activity;oxidoreductase activity, acting on single donors with incorporation of molecular …	cell part;cytoplasmic part;cytosol;endoplasmic reticulum;endoplasmic reticulum membrane;endoplasmic reticulum part;envelope;integral to membrane;intracellular membrane-bounded organelle;intracellular organelle;intracellular organelle part;intracellular part;intrinsic to membrane;membrane;membrane part;membrane-bounded organelle;nuclear envelope;nuclear membrane;nuclear part;nucleus;organelle;orga…	22.4923	22.775	22.6744	22.8462	25.3976	26.0049	24.5247	24.3876
A0A024R0Q9;Q96D53;M0R011	AarF domain-containing protein kinase 4	ADCK4	2.36512	3.70835	3	3	7	7	55852	57555	21451000	7		catalytic activity;kinase activity;phosphotransferase activity, alcohol group as acceptor;protein kinase activity;protein serine/threonine kinase activity;transferase activity;transferase activity, transferring phosphorus-containing groups	cell part;cytoplasmic part;cytosol;integral to membrane;intracellular organelle part;intracellular part;intrinsic to membrane;membrane;membrane part;mitochondrial membrane;mitochondrial part;organelle membrane;organelle part;plasma membrane	20.049	20.4099	20.5567	20.6984	22.1944	23.3574	23.0593	22.5633
A0A024R8G6;O43805;A0A087WV26	Sjoegren syndrome nuclear autoantigen 1	SSNA1	2.3526	1.84188	2	2	227	227	13596	66069	6250000	3	cell cycle;cell cycle process;cellular component movement;cellular component organization;cellular component organization at cellular level;cellular component organization or biogenesis;cellular component organization or biogenesis at cellular level;cellular localization;cellular macromolecule localization;cellular membrane organization;cellular process;cellular protein localization;ciliary recep…		cell part;centrosome;cytoplasmic part;cytoskeletal part;cytosol;intracellular membrane-bounded organelle;intracellular non-membrane-bounded organelle;intracellular organelle;intracellular organelle part;intracellular part;membrane-bounded organelle;microtubule organizing center;non-membrane-bounded organelle;nucleus;organelle;organelle part	19.2064	20.3651	19.3649	20.9372	20.7698	23.1842	23.0504	22.2796
F5GY37;J3KPX7;Q99623;F5GWA7;F5H3X6;B4DW05	Prohibitin-2	PHB2	2.33664	4.0401	6	6	202	202	29723	12589	157210000	22	anatomical structure development;anatomical structure morphogenesis;biological regulation;biosynthetic process;branching involved in mammary gland duct morphogenesis;branching morphogenesis of a tube;cellular biosynthetic process;cellular component organization;cellular component organization at cellular level;cellular component organization or biogenesis;cellular component organization or biogen…	binding;estrogen receptor binding;hormone receptor binding;nuclear hormone receptor binding;protein binding;protein N-terminus binding;receptor binding;steroid hormone receptor binding	cell part;cell surface;cytoplasmic part;extracellular membrane-bounded organelle;extracellular organelle;extracellular region part;extracellular vesicular exosome;intracellular membrane-bounded organelle;intracellular organelle;intracellular organelle part;intracellular part;macromolecular complex;membrane;membrane-bounded organelle;membrane-bounded vesicle;mitochondrial inner membrane;mitochondr…	23.2723	24.1136	23.5281	23.8334	25.4984	26.1898	26.1906	26.2152
O95429;B2RA34	BAG family molecular chaperone regulator 4	BAG4	2.32675	3.93197	5	5	21	21	49593	2997	35605000	14	biological regulation;cell surface receptor linked signaling pathway;cellular component assembly;cellular component organization;cellular component organization or biogenesis;cellular localization;cellular macromolecule localization;cellular macromolecule metabolic process;cellular membrane organization;cellular metabolic process;cellular process;cellular protein localization;cellular protein met…	molecular transducer activity;receptor signaling protein activity;signal transducer activity	cell part;cytoplasmic part;cytosol;intracellular membrane-bounded organelle;intracellular organelle;intracellular part;membrane;membrane-bounded organelle;nucleus;organelle;plasma membrane	20.8689	21.1679	21.218	21.8616	23.1956	23.7357	23.9515	23.5406
B7ZLF4;A0A024R7C4;B4DUY9;Q8N9T8;H0YFD2;F8WFC1;B4DUT2	Protein KRI1 homolog	KRI1;FLJ12949	2.32518	4.66078	5	5	126	126	54924	38381	46160000	11			cell part;intracellular non-membrane-bounded organelle;intracellular organelle;intracellular organelle part;intracellular part;non-membrane-bounded organelle;nuclear part;nucleolus;organelle;organelle part	21.2983	21.3982	21.9505	21.6979	24.0468	23.8922	24.1476	23.5591
Q96F46	Interleukin-17 receptor A	IL17RA	2.32283	1.36875	3	3	65	65	96121	9328	8907800	6	biological regulation;cell activation;cell surface receptor linked signaling pathway;cellular process;cellular response to chemical stimulus;cellular response to cytokine stimulus;cellular response to organic substance;cellular response to stimulus;cytokine-mediated signaling pathway;fibroblast activation;positive regulation of biological process;positive regulation of cytokine production;positiv…	binding;cytokine binding;cytokine receptor activity;interleukin-17 binding;interleukin-17 receptor activity;molecular transducer activity;protein binding;receptor activity;signal transducer activity;signaling receptor activity;transmembrane signaling receptor activity	cell part;extracellular region;integral to membrane;integral to plasma membrane;intrinsic to membrane;intrinsic to plasma membrane;membrane part;plasma membrane part	17.9188	21.92	18.6607	19.2966	21.0843	21.721	22.2468	22.0353
B4DEP6;E7EX17;B4DRM3;P23588;Q7Z5Y0;B4DS01	Eukaryotic translation initiation factor 4B	EIF4B	2.32212	3.8527	11	11	221	221	66127	29595	138930000	31	biological regulation;biosynthetic process;catabolic process;cell surface receptor linked signaling pathway;cellular biosynthetic process;cellular catabolic process;cellular macromolecule biosynthetic process;cellular macromolecule catabolic process;cellular macromolecule metabolic process;cellular metabolic process;cellular nitrogen compound metabolic process;cellular process;cellular protein me…	binding;nucleic acid binding;nucleotide binding;RNA binding;translation factor activity, nucleic acid binding;translation initiation factor activity	cell part;cytoplasmic part;cytosol;eukaryotic translation initiation factor 4F complex;intracellular part;macromolecular complex;protein complex	22.9604	23.2179	23.4579	23.5348	24.9537	25.5779	25.985	25.943
Q5T942;O15062	Zinc finger and BTB domain-containing protein 5	ZBTB5	2.31798	1.64983	2	2	38	38	74277	26636	3658800	3	biological regulation;biosynthetic process;cellular biosynthetic process;cellular macromolecule biosynthetic process;cellular macromolecule metabolic process;cellular metabolic process;cellular nitrogen compound metabolic process;cellular process;macromolecule biosynthetic process;macromolecule metabolic process;metabolic process;nitrogen compound metabolic process;nucleic acid metabolic process;…	binding;cation binding;DNA binding;ion binding;metal ion binding;nucleic acid binding	cell part;intracellular membrane-bounded organelle;intracellular organelle;intracellular part;membrane-bounded organelle;nucleus;organelle	19.6446	19.7475	20.0482	19.8929	19.9895	23.4769	22.7109	22.4278
Q9Y2V2;H3BTK3;I3L3X8;H3BSW7;H3BUY4;H3BPY5;H3BNU9	Calcium-regulated heat stable protein 1	CARHSP1	2.30463	1.79851	2	2	238	238	15892	15024	201740000	19	biological regulation;cellular macromolecule metabolic process;cellular metabolic process;cellular nitrogen compound metabolic process;cellular process;cellular response to stimulus;intracellular signal transduction;macromolecule metabolic process;metabolic process;mRNA metabolic process;nitrogen compound metabolic process;nucleic acid metabolic process;nucleobase-containing compound metabolic pr…	binding;DNA binding;enzyme binding;mRNA 3'-UTR binding;mRNA binding;nucleic acid binding;phosphatase binding;protein binding;RNA binding	cell part;cytoplasmic mRNA processing body;cytoplasmic part;cytosol;extracellular membrane-bounded organelle;extracellular organelle;extracellular region part;extracellular vesicular exosome;intracellular non-membrane-bounded organelle;intracellular organelle;intracellular part;macromolecular complex;membrane-bounded organelle;membrane-bounded vesicle;non-membrane-bounded organelle;organelle;P gr…	24.1717	23.551	23.6771	23.7111	24.6291	25.8524	25.9335	27.9144
O75381;B7Z4Z4	Peroxisomal membrane protein PEX14	PEX14	2.29493	1.20277	4	4	122	122	41236	15969	20521000	7	biological regulation;cellular component assembly;cellular component assembly at cellular level;cellular component organization;cellular component organization at cellular level;cellular component organization or biogenesis;cellular component organization or biogenesis at cellular level;cellular macromolecular complex assembly;cellular macromolecular complex subunit organization;cellular process;…	beta-tubulin binding;binding;cytoskeletal protein binding;microtubule binding;protein binding;protein binding transcription factor activity;protein N-terminus binding;receptor binding;transcription cofactor activity;transcription corepressor activity;transcription factor binding transcription factor activity;tubulin binding	cell part;cytoplasmic part;integral to membrane;intracellular;intracellular membrane-bounded organelle;intracellular non-membrane-bounded organelle;intracellular organelle;intracellular organelle part;intracellular part;intrinsic to membrane;macromolecular complex;membrane;membrane part;membrane-bounded organelle;microbody;microbody membrane;microbody part;non-membrane-bounded organelle;nuclear p…	21.5166	22.5125	19.2612	19.5892	21.1039	23.57	23.6163	23.769
Q9Y6A5;B4DYJ1;B4E355	Transforming acidic coiled-coil-containing protein 3	TACC3	2.29436	3.98381	10	10	134	134	90359	27492	66092000	18	anatomical structure development;astral microtubule organization;biological regulation;cell differentiation;cell proliferation;cellular component organization;cellular component organization at cellular level;cellular component organization or biogenesis;cellular component organization or biogenesis at cellular level;cellular developmental process;cellular localization;cellular process;cerebral c…		cell part;centrosome;cytoplasm;cytoplasmic part;cytoskeletal part;intracellular non-membrane-bounded organelle;intracellular organelle;intracellular organelle part;intracellular part;microtubule organizing center;non-membrane-bounded organelle;organelle;organelle part	21.7607	22.3761	22.4343	22.2808	23.9732	24.4759	24.6398	24.9403
A0A024R2D7;A8K899;O75528;C9JMS0	Transcriptional adapter 3	TADA3L;TADA3	2.29377	3.00818	2	2	6	6	41392	28124	10219000	3	biological regulation;biosynthetic process;cell cycle phase;cell cycle process;cellular biosynthetic process;cellular component organization;cellular component organization at cellular level;cellular component organization or biogenesis;cellular component organization or biogenesis at cellular level;cellular macromolecule biosynthetic process;cellular macromolecule metabolic process;cellular meta…	binding;ligand-dependent nuclear receptor binding;ligand-dependent nuclear receptor transcription coactivator activity;nucleic acid binding transcription factor activity;protein binding;protein binding transcription factor activity;protein domain specific binding;receptor binding;sequence-specific DNA binding transcription factor activity;transcription coactivator activity;transcription cofactor …	Ada2/Gcn5/Ada3 transcription activator complex;cell part;cytoskeletal part;histone acetyltransferase complex;intracellular;intracellular membrane-bounded organelle;intracellular non-membrane-bounded organelle;intracellular organelle;intracellular organelle part;intracellular part;macromolecular complex;membrane-bounded organelle;mitotic spindle;non-membrane-bounded organelle;nuclear part;nucleopl…	19.4362	19.6791	19.5201	19.7159	21.249	22.6736	22.3819	21.2218
Q5U5Z3;Q9UL42	Paraneoplastic antigen Ma2	PNMA2	2.29093	2.03048	4	4	126	126	4144	3723	41937000	8	biological regulation;positive regulation of apoptosis;positive regulation of biological process;positive regulation of cell death;positive regulation of cellular process;positive regulation of programmed cell death;regulation of apoptosis;regulation of biological process;regulation of cell death;regulation of cellular process;regulation of programmed cell death		cell part;intracellular non-membrane-bounded organelle;intracellular organelle;intracellular organelle part;intracellular part;non-membrane-bounded organelle;nuclear part;nucleolus;organelle;organelle part	21.7245	21.3424	21.1813	21.5872	24.855	22.5647	22.8865	24.693
O43823;Q8NE02	A-kinase anchor protein 8	AKAP8	2.28682	4.63203	9	9	212	212	76107	74334	191540000	27	biological regulation;cell cycle phase;cell cycle process;cellular component organization;cellular component organization at cellular level;cellular component organization or biogenesis;cellular component organization or biogenesis at cellular level;cellular macromolecule metabolic process;cellular metabolic process;cellular nitrogen compound metabolic process;cellular process;cellular response t…	binding;catalytic activity;cation binding;DNA binding;double-stranded DNA binding;ion binding;kinase activity;metal ion binding;nucleic acid binding;structure-specific DNA binding;transferase activity;transferase activity, transferring phosphorus-containing groups;transition metal ion binding;zinc ion binding	cell part;chromosome;condensed chromosome;cytoplasmic part;female pronucleus;Golgi apparatus;intracellular membrane-bounded organelle;intracellular non-membrane-bounded organelle;intracellular organelle;intracellular organelle part;intracellular part;membrane;membrane-bounded organelle;mitochondrion;non-membrane-bounded organelle;nuclear matrix;nuclear part;nucleoplasm;nucleus;organelle;organelle…	23.5762	23.6981	23.8412	24.2185	25.7722	26.0411	26.2805	26.3874
Q13188;A0A087WZ06;E5RFQ9	Serine/threonine-protein kinase 3;Serine/threonine-protein kinase 3 36kDa subunit;Serine/threonine-protein kinase 3 20kDa subunit	STK3	2.26998	4.50547	12	8	257	169	563	57682	259860000	26	activation of MAPKK activity;activation of protein kinase activity;anatomical structure development;anatomical structure formation involved in morphogenesis;apoptosis;biological regulation;cell death;cell differentiation;cell differentiation involved in embryonic placenta development;cellular developmental process;cellular macromolecule metabolic process;cellular metabolic process;cellular proces…	adenyl nucleotide binding;adenyl ribonucleotide binding;ATP binding;binding;catalytic activity;cation binding;enzyme activator activity;enzyme regulator activity;ion binding;kinase activator activity;kinase activity;kinase regulator activity;magnesium ion binding;MAP kinase kinase kinase activity;metal ion binding;molecular transducer activity;nucleotide binding;phosphotransferase activity, alcoh…	cell part;cytoplasm;cytoplasmic part;cytosol;intracellular membrane-bounded organelle;intracellular organelle;intracellular part;membrane-bounded organelle;nucleus;organelle	24.1786	24.1192	24.2186	23.7216	25.9691	26.1151	26.606	26.6277
Q96P48;A0A0A0MSJ2;E7EU13;B7ZMI2;F5GWN4;F8WBT0	Arf-GAP with Rho-GAP domain, ANK repeat and PH domain-containing protein 1	ARAP1	2.26834	1.30139	6	6	53	53	16219	4866	157800000	16	actin cytoskeleton organization;actin cytoskeleton reorganization;actin filament organization;actin filament reorganization involved in cell cycle;actin filament-based process;biological regulation;cell cycle process;cellular component organization;cellular component organization at cellular level;cellular component organization or biogenesis;cellular component organization or biogenesis at cellu…	binding;cation binding;enzyme activator activity;enzyme regulator activity;GTPase activator activity;GTPase regulator activity;ion binding;lipid binding;metal ion binding;nucleoside-triphosphatase regulator activity;phosphatidylinositol binding;phosphatidylinositol-3,4,5-trisphosphate binding;phospholipid binding;transition metal ion binding;zinc ion binding	cell part;cytoplasmic part;cytoplasmic vesicle;cytosol;Golgi apparatus;Golgi apparatus part;Golgi cisterna membrane;Golgi membrane;intracellular;intracellular membrane-bounded organelle;intracellular organelle;intracellular organelle part;intracellular part;membrane;membrane-bounded organelle;organelle;organelle membrane;organelle part;plasma membrane;trans-Golgi network;vesicle	24.5309	24.5012	20.7619	24.0045	25.1178	25.8538	26.0339	25.8664
C9JZ87;A0A024R9Z1;Q8N353;Q9NUM4;F2Z3N7	Transmembrane protein 106B	TMEM106B	2.25256	2.56897	4	4	527	527	12201	17523	36198000	10	anatomical structure morphogenesis;cell part morphogenesis;cell projection morphogenesis;cell projection organization;cellular component morphogenesis;cellular component organization;cellular component organization at cellular level;cellular component organization or biogenesis;cellular component organization or biogenesis at cellular level;cellular developmental process;cellular localization;cel…		cell part;cytoplasmic part;endosomal part;endosome membrane;extracellular membrane-bounded organelle;extracellular organelle;extracellular region part;extracellular vesicular exosome;integral to membrane;intracellular membrane-bounded organelle;intracellular organelle;intracellular organelle part;intracellular part;intrinsic to membrane;late endosome membrane;lysosomal membrane;membrane;membrane …	20.7369	21.4629	21.8593	21.849	22.6761	23.7574	24.0668	24.4182
A0A024RDI1;A0A024RDK6;Q63HQ0;H0Y8Y4	AP-1 complex-associated regulatory protein	C4orf16;AP1AR	2.23773	3.33609	3	3	138	138	30459	126	29809000	6	biological regulation;cellular localization;cellular macromolecule localization;cellular process;cellular protein localization;establishment of localization;establishment of protein localization;localization;macromolecule localization;negative regulation of biological process;negative regulation of cell motility;negative regulation of cellular component movement;negative regulation of cellular me…	AP-1 adaptor complex binding;binding;cytoskeletal protein binding;kinesin binding;protein binding;protein complex binding	cell part;cytoplasmic membrane-bounded vesicle;cytoplasmic part;cytoplasmic vesicle;early endosome;endosome;Golgi apparatus;intracellular membrane-bounded organelle;intracellular organelle;intracellular part;late endosome;membrane-bounded organelle;membrane-bounded vesicle;organelle;transport vesicle;vesicle	21.3913	20.9708	22.3172	21.7036	23.8421	24.1021	24.0034	23.3863
B4DKK1;A0A087WV67;A0A087WT23;O00124	UBX domain-containing protein 8	UBXN8	2.23389	1.77159	1	1	105	105	18223	45938	4714200	2	catabolic process;cellular catabolic process;cellular macromolecule catabolic process;cellular macromolecule metabolic process;cellular metabolic process;cellular process;ER-associated protein catabolic process;fertilization;macromolecule catabolic process;macromolecule metabolic process;metabolic process;modification-dependent macromolecule catabolic process;modification-dependent protein catabo…		cell part;cytoplasmic part;endoplasmic reticulum part;integral to endoplasmic reticulum membrane;integral to membrane;integral to organelle membrane;intracellular organelle part;intracellular part;intrinsic to endoplasmic reticulum membrane;intrinsic to membrane;intrinsic to organelle membrane;membrane part;organelle part	18.4787	18.4069	21.101	19.0353	21.0324	21.6318	22.1591	21.1341
Q71UA6;Q15758;M0QXM4	Amino acid transporter;Neutral amino acid transporter B(0)	SLC1A5	2.22702	3.90636	4	2	104	55	56583	5095	241550000	22	amine transport;amino acid transport;carboxylic acid transport;cellular process;establishment of localization;extracellular amino acid transport;extracellular transport;glutamine transport;ion transport;neutral amino acid transport;nitrogen compound transport;organic acid transport;organic substance transport;transmembrane transport;transport	active transmembrane transporter activity;amine transmembrane transporter activity;amino acid transmembrane transporter activity;anion transmembrane transporter activity;anion:cation symporter activity;carboxylic acid transmembrane transporter activity;cation transmembrane transporter activity;dicarboxylic acid transmembrane transporter activity;inorganic cation transmembrane transporter activity…	cell part;cytoplasmic membrane-bounded vesicle;cytoplasmic part;cytoplasmic vesicle;extracellular membrane-bounded organelle;extracellular organelle;extracellular region part;extracellular vesicular exosome;Golgi apparatus;integral to membrane;integral to plasma membrane;intracellular membrane-bounded organelle;intracellular organelle;intracellular part;intrinsic to membrane;intrinsic to plasma m…	24.2348	23.9244	24.2367	24.5592	26.1884	26.0024	26.7615	26.911
Q5JPC5;Q8NB16	Mixed lineage kinase domain-like protein	DKFZp667E1714;MLKL	2.20911	2.57206	5	5	142	142	4923	30703	115490000	13	cell death;cellular component assembly;cellular component organization;cellular component organization or biogenesis;cellular process;death;macromolecular complex assembly;macromolecular complex subunit organization;necroptosis;necrotic cell death;programmed cell death;protein complex assembly;protein complex subunit organization;protein homooligomerization;protein homotrimerization;protein oligo…	adenyl nucleotide binding;adenyl ribonucleotide binding;ATP binding;binding;catalytic activity;kinase activity;nucleotide binding;phosphotransferase activity, alcohol group as acceptor;protein binding;protein complex binding;protein kinase activity;protein serine/threonine kinase activity;purine nucleotide binding;purine ribonucleoside triphosphate binding;purine ribonucleotide binding;ribonucleo…	cell part;cytoplasm;cytoplasmic part;cytosol;intracellular part;membrane;plasma membrane	23.3211	23.0507	22.7758	23.667	24.6838	24.9626	25.4716	26.533
Q969E2	Secretory carrier-associated membrane protein 4	SCAMP4	2.2077	1.97502	3	3	223	223	25728	14016	58365000	25	establishment of localization;establishment of protein localization;protein transport;transport		cell part;integral to membrane;intrinsic to membrane;membrane part	22.9783	21.3032	21.9387	23.7233	24.7384	24.4174	24.18	25.4384
Q5VST6	Alpha/beta hydrolase domain-containing protein 17B	ABHD17B	2.20699	3.05894	4	4	153	153	32214	6536	72248000	10		catalytic activity;hydrolase activity	cell part;extracellular region;membrane	21.9006	22.1957	22.8336	22.9028	23.9616	24.6715	25.2449	24.7825
O95169;K9J7I2;E9PQ68	NADH dehydrogenase [ubiquinone] 1 beta subcomplex subunit 8, mitochondrial	NDUFB8	2.20226	1.03096	5	5	296	296	21766	36079	550000000	44	cellular metabolic process;cellular process;electron transport chain;generation of precursor metabolites and energy;metabolic process;mitochondrial electron transport, NADH to ubiquinone;oxidation-reduction process;respiratory electron transport chain;small molecule metabolic process	catalytic activity;NADH dehydrogenase (quinone) activity;NADH dehydrogenase (ubiquinone) activity;NADH dehydrogenase activity;oxidoreductase activity;oxidoreductase activity, acting on NADH or NADPH;oxidoreductase activity, acting on NADH or NADPH, quinone or similar compound as acceptor	cell part;cytoplasmic part;endoplasmic reticulum;integral to membrane;intracellular membrane-bounded organelle;intracellular organelle;intracellular organelle part;intracellular part;intrinsic to membrane;macromolecular complex;membrane;membrane part;membrane-bounded organelle;mitochondrial inner membrane;mitochondrial membrane;mitochondrial membrane part;mitochondrial part;mitochondrial respirat…	25.5592	25.5766	24.551	23.4658	27.2648	25.1665	25.8937	29.6367
A0A024R167;B4E2K2;A0A024R152;Q9Y2D5;C9JVY5	A-kinase anchor protein 2	hCG_28765;AKAP2	2.19596	3.11239	3	3	43	43	10187	79302	38410000	8	biological regulation;regulation of anatomical structure morphogenesis;regulation of biological process;regulation of biological quality;regulation of cell morphogenesis;regulation of cell shape;regulation of cellular component organization;regulation of cellular process;regulation of developmental process	catalytic activity;kinase activity;transferase activity;transferase activity, transferring phosphorus-containing groups	cell part;membrane	21.2775	21.7668	21.7926	21.9278	23.0562	23.709	24.4301	24.3532
Q6ICS0;Q59EP1;B4DPJ2;Q5T0G8;B7Z6L0;P50995	Annexin;Annexin A11	ANXA11	2.17209	3.83848	9	9	162	162	54336	66231	621480000	23	cell cycle;cell division;cellular component organization;cellular component organization or biogenesis;cellular membrane organization;cellular process;endocytosis;establishment of localization;membrane invagination;membrane organization;phagocytosis;response to calcium ion;response to chemical stimulus;response to inorganic substance;response to metal ion;response to stimulus;transport;vesicle-me…	antigen binding;binding;calcium ion binding;calcium-dependent phospholipid binding;calcium-dependent protein binding;cation binding;ion binding;lipid binding;metal ion binding;MHC class II protein complex binding;MHC protein complex binding;phosphatidylethanolamine binding;phospholipid binding;protein binding	azurophil granule;cell part;cytoplasm;cytoplasmic membrane-bounded vesicle;cytoplasmic part;cytoplasmic vesicle;cytoskeletal part;endocytic vesicle;envelope;extracellular membrane-bounded organelle;extracellular organelle;extracellular region part;extracellular vesicular exosome;intracellular membrane-bounded organelle;intracellular non-membrane-bounded organelle;intracellular organelle;intracell…	25.1907	25.5087	25.5475	25.8029	27.4417	28.0164	28.099	27.1811
B7Z7P4;X5CKB3;B2R9F3;A0A1V0E3Y2;A0A1V0E3X9;A0A140T9T7;A0A0S2Z5A6;Q03518;A0A1V0E3X7;A0A0S2Z4R8	Antigen peptide transporter 1	TAP1	2.16726	2.30213	9	1	26	55	59939	96267	243390000	29	antigen processing and presentation;antigen processing and presentation of endogenous antigen;antigen processing and presentation of endogenous peptide antigen;antigen processing and presentation of endogenous peptide antigen via MHC class I;antigen processing and presentation of exogenous antigen;antigen processing and presentation of exogenous peptide antigen;antigen processing and presentation…	active transmembrane transporter activity;adenyl nucleotide binding;adenyl ribonucleotide binding;ADP binding;antigen binding;ATP binding;ATPase activity;ATPase activity, coupled;ATPase activity, coupled to movement of substances;ATPase activity, coupled to transmembrane movement of substances;binding;catalytic activity;hydrolase activity;hydrolase activity, acting on acid anhydrides;hydrolase ac…	cell part;cytoplasmic part;endoplasmic reticulum membrane;endoplasmic reticulum part;integral to endoplasmic reticulum membrane;integral to membrane;integral to organelle membrane;intracellular membrane-bounded organelle;intracellular organelle;intracellular organelle part;intracellular part;intrinsic to endoplasmic reticulum membrane;intrinsic to membrane;intrinsic to organelle membrane;macromol…	24.7839	24.5899	23.1492	23.2895	26.8394	25.7532	25.694	26.195
A0A024R258;B3KNI8;B3KNI2;Q9UMX0;Q59FJ2;H0YDS0;D3DVA8;B4DZF6;Q59F94;Q9NRR5	Ubiquilin-1;Ubiquilin-4	UBQLN1;UBQLN4	2.16608	2.74139	5	4	121	103	59219	1604	81592000	11	aggrephagy;autophagy;biological regulation;catabolic process;cell communication;cellular catabolic process;cellular macromolecule catabolic process;cellular macromolecule metabolic process;cellular metabolic process;cellular process;cellular response to chemical stimulus;cellular response to external stimulus;cellular response to extracellular stimulus;cellular response to hypoxia;cellular respon…	binding;enzyme binding;identical protein binding;kinase binding;polyubiquitin binding;protein binding;small conjugating protein binding;ubiquitin binding	aggresome;autophagic vacuole;cell part;cytoplasm;cytoplasmic part;cytosol;endoplasmic reticulum;endoplasmic reticulum membrane;endoplasmic reticulum part;inclusion body;intracellular membrane-bounded organelle;intracellular organelle;intracellular organelle part;intracellular part;macromolecular complex;membrane;membrane part;membrane-bounded organelle;nuclear part;nucleoplasm;nucleus;organelle;o…	22.1391	22.2844	23.0691	23.2469	24.0085	24.8592	25.1736	25.3626
H7C4H8;Q53XR2;F8W8D3;Q14493;B3KST9;B3KSC5;H0YAE8;E7EUV9;B4DUW7	Histone RNA hairpin-binding protein	SLBP	2.16037	0.628169	5	5	382	382	21231	134	25358000	8	biosynthetic process;cellular biosynthetic process;cellular macromolecule biosynthetic process;cellular macromolecule metabolic process;cellular metabolic process;cellular nitrogen compound metabolic process;cellular process;DNA metabolic process;DNA replication;DNA replication involved in S phase;DNA-dependent DNA replication;establishment of localization;establishment of localization in cell;es…	binding;histone pre-mRNA DCP binding;histone pre-mRNA stem-loop binding;mRNA binding;nucleic acid binding;pre-mRNA binding;RNA binding	cell part;cytoplasm;cytoplasmic part;cytosol;histone pre-mRNA 3'end processing complex;intracellular membrane-bounded organelle;intracellular organelle;intracellular organelle part;intracellular part;macromolecular complex;membrane-bounded organelle;nuclear part;nucleoplasm;nucleus;organelle;organelle part;ribonucleoprotein complex	19.1535	18.1898	17.1523	17.2395	24.603	19.8649	18.0726	17.836
C9JTE9;A4D0R4;E9PAJ1;H7C5E2;Q9UHQ4;C9JGJ9;B7Z2L0;A6NME1;H0Y7N8;F8WB99;C9IYK6	B-cell receptor-associated protein 29	BCAP29	2.15603	2.70078	2	2	104	104	26953	55935	29555000	3	apoptosis;cell death;cell differentiation;cellular developmental process;cellular localization;cellular macromolecule localization;cellular process;cellular protein localization;death;developmental process;ER to Golgi vesicle-mediated transport;establishment of localization;establishment of localization in cell;establishment of protein localization;Golgi vesicle transport;intracellular protein tr…		cell part;cytoplasmic part;endoplasmic reticulum;endoplasmic reticulum membrane;endoplasmic reticulum part;integral to membrane;intracellular membrane-bounded organelle;intracellular organelle;intracellular organelle part;intracellular part;intrinsic to membrane;membrane;membrane part;membrane-bounded organelle;organelle;organelle membrane;organelle part	20.7279	21.3866	22.0721	21.4909	23.808	23.8223	22.66	24.0114
B4DM89;Q9NW68;B7ZA57	BSD domain-containing protein 1	BSDC1	2.15355	2.40527	2	2	62	62	39956	62173	12843000	3				21.088	20.6874	19.7845	20.0501	21.4764	22.7914	23.1587	22.7977
A0PJW6	Transmembrane protein 223	TMEM223	2.10323	1.13235	1	1	5	5	22049	23156	4928800	1			cell part;integral to membrane;intrinsic to membrane;membrane part	20.1998	21.0151	19.9562	19.3588	20.3251	24.4256	22.9456	21.2465
A2RU67;Q69YM1	Uncharacterized protein KIAA1467	KIAA1467;DKFZp762C0813	2.10003	2.38241	4	4	76	76	67038	13889	40155000	7			cell part;integral to membrane;intrinsic to membrane;membrane part	20.9312	22.0039	21.4281	21.2778	23.7903	24.0532	23.909	22.2886
Q6DD88	Atlastin-3	ATL3	2.08535	1.71638	1	1	39	39	60541	7762	110720000	10	cellular component assembly;cellular component organization;cellular component organization at cellular level;cellular component organization or biogenesis;cellular component organization or biogenesis at cellular level;cellular process;endoplasmic reticulum organization;Golgi organization;macromolecular complex assembly;macromolecular complex subunit organization;metabolic process;organelle orga…	binding;catalytic activity;GTP binding;GTPase activity;guanyl nucleotide binding;guanyl ribonucleotide binding;hydrolase activity;hydrolase activity, acting on acid anhydrides;hydrolase activity, acting on acid anhydrides, in phosphorus-containing anhydrides;identical protein binding;nucleoside-triphosphatase activity;nucleotide binding;protein binding;purine nucleotide binding;purine ribonucleos…	cell part;cytoplasmic part;endoplasmic reticulum;endoplasmic reticulum membrane;endoplasmic reticulum part;integral to membrane;intracellular membrane-bounded organelle;intracellular organelle;intracellular organelle part;intracellular part;intrinsic to membrane;membrane;membrane part;membrane-bounded organelle;organelle;organelle membrane;organelle part	24.4754	21.7414	22.1638	23.4864	25.2207	24.5996	24.8676	25.5204
A8K575;Q9NQZ5;C9JTD3;B3KNN8	StAR-related lipid transfer protein 7, mitochondrial	STARD7	2.0826	1.43583	2	2	78	78	34638	38634	12182000	2		binding;lipid binding	cell part;cytoplasmic part;intracellular membrane-bounded organelle;intracellular organelle;intracellular part;membrane-bounded organelle;mitochondrion;organelle	19.1993	18.6353	19.4899	21.966	22.3214	21.5025	21.4395	22.3576
A0A1B0GX12;A0A0B4J2E0;A0A0A6YYD5;A0A5A8;P01733	T-cell receptor beta chain V region YT35	TRBV12-4;TRBV12-3;TCRBV8S2A1T	2.07473	1.09132	1	1	113	113	1304	2012	267260000	26	activation of immune response;antigen receptor-mediated signaling pathway;biological regulation;cell surface receptor linked signaling pathway;cellular process;cellular response to stimulus;immune response;immune response-activating cell surface receptor signaling pathway;immune response-activating signal transduction;immune response-regulating cell surface receptor signaling pathway;immune respo…	antigen binding;binding;MHC protein binding;peptide antigen binding;peptide binding;protein binding;receptor binding	cell part;membrane;plasma membrane	25.2951	24.309	22.4802	21.8651	27.1699	24.9203	24.4804	25.6777
C9JA28;Q9UNL2	Translocon-associated protein subunit gamma	SSR3	2.07205	4.05443	1	1	8	8	20161	49672	145890000	10	biosynthetic process;cellular biosynthetic process;cellular macromolecule biosynthetic process;cellular macromolecule metabolic process;cellular metabolic process;cellular process;cellular protein metabolic process;cotranslational protein targeting to membrane;establishment of localization;establishment of localization in cell;establishment of protein localization;establishment of protein localiz…		cell part;cytoplasmic part;endoplasmic reticulum part;integral to endoplasmic reticulum membrane;integral to membrane;integral to organelle membrane;intracellular organelle part;intracellular part;intrinsic to endoplasmic reticulum membrane;intrinsic to membrane;intrinsic to organelle membrane;macromolecular complex;membrane part;organelle part;protein complex;Sec61 translocon complex;translocon …	23.3377	23.0712	23.5769	23.5009	25.4445	24.9374	25.519	25.8741
K7EQ23;A0A193DRS0;A0A0A8JCD0;Q59GR1;O15118;A0A0S2A5C8	Niemann-Pick C1 protein	NPC1	2.07096	3.46035	3	3	33	33	10806	70669	18495000	5	adult behavior;adult locomotory behavior;adult walking behavior;alcohol metabolic process;autophagy;behavior;bile acid metabolic process;biological regulation;carbohydrate metabolic process;carboxylic acid metabolic process;catabolic process;cellular carbohydrate metabolic process;cellular catabolic process;cellular component organization;cellular component organization or biogenesis;cellular ket…	binding;cholesterol binding;hedgehog receptor activity;lipid binding;lipid transporter activity;molecular transducer activity;receptor activity;signal transducer activity;signaling receptor activity;steroid binding;sterol binding;sterol transporter activity;substrate-specific transporter activity;transmembrane signaling receptor activity;transporter activity	cell part;cytoplasmic part;endoplasmic reticulum;endosomal part;endosome membrane;envelope;extracellular membrane-bounded organelle;extracellular organelle;extracellular region;extracellular region part;extracellular vesicular exosome;Golgi apparatus;integral to membrane;integral to plasma membrane;intracellular membrane-bounded organelle;intracellular organelle;intracellular organelle part;intra…	20.2791	20.0691	20.1458	20.1954	22.8373	21.6354	22.5893	21.9112
G5E994;Q5VW38;A8KAM7	Protein GPR107	GPR107	2.06965	3.51314	3	3	49	49	63984	7269	35040000	9			cell part;cytoplasmic part;Golgi apparatus;integral to membrane;intracellular membrane-bounded organelle;intracellular organelle;intracellular part;intrinsic to membrane;membrane part;membrane-bounded organelle;organelle	21.1153	21.3377	21.5794	21.7782	22.8199	23.8583	23.7748	23.6362
E7EMV7;B7Z5B0;B7Z8K2;A0A0A0MRZ4;A4F1Y0;A8K4N4;Q15025;E7EW15	TNFAIP3-interacting protein 1	TNIP1;NAF1	2.05997	3.27977	4	4	79	79	55697	11097	24314000	8	activation of immune response;activation of innate immune response;biological adhesion;biological regulation;biosynthetic process;cell adhesion;cell-cell adhesion;cellular biosynthetic process;cellular macromolecule biosynthetic process;cellular macromolecule metabolic process;cellular metabolic process;cellular process;cellular protein metabolic process;cellular response to stimulus;defense resp…	binding;enzyme binding;kinase binding;mitogen-activated protein kinase binding;protein binding;protein kinase binding	cell part;cytoplasm;intracellular;intracellular membrane-bounded organelle;intracellular organelle;intracellular part;membrane-bounded organelle;nucleus;organelle	20.4935	21.1222	20.5919	21.0413	22.1038	22.9722	23.1687	23.244
Q53RX3;Q9HBH5	Retinol dehydrogenase 14	RDH14	2.05132	2.14781	8	8	298	298	36864	27987	133180000	22	cell differentiation;cellular developmental process;cellular metabolic process;cellular nitrogen compound metabolic process;cellular process;developmental process;metabolic process;nitrogen compound metabolic process;nucleobase-containing compound metabolic process;nucleobase-containing small molecule metabolic process;nucleoside phosphate metabolic process;nucleotide metabolic process;osteoblast…	5'-nucleotidase activity;binding;catalytic activity;cation binding;hydrolase activity;hydrolase activity, acting on ester bonds;ion binding;magnesium ion binding;metal ion binding;nucleotidase activity;nucleotide binding;oxidoreductase activity;phosphatase activity;phosphoric ester hydrolase activity	cell part;cytoplasm;cytoplasmic part;endoplasmic reticulum;endoplasmic reticulum membrane;endoplasmic reticulum part;intracellular membrane-bounded organelle;intracellular organelle;intracellular organelle part;intracellular part;lysosomal membrane;membrane;membrane part;membrane-bounded organelle;mitochondrion;nucleus;organelle;organelle membrane;organelle part;vacuolar membrane;vacuolar part	23.2056	23.3145	22.9538	24.1158	26.4027	24.5832	24.7981	26.011
D3DQS4;Q8N3X1;B3KNP0	Formin-binding protein 4	FNBP4	2.04472	2.32735	6	6	71	71	11025	16339	33965000	11			cell part;intracellular organelle part;intracellular part;nuclear part;nucleoplasm;organelle part	20.8898	21.712	21.9865	21.8161	22.4908	23.8923	24.3276	23.8726
Q9NQ88	Fructose-2,6-bisphosphatase TIGAR	TIGAR	2.03379	0.825715	3	3	137	137	30062	25949	87107000	13	anatomical structure development;biological regulation;biosynthetic process;cell development;cellular biosynthetic process;cellular developmental process;cellular macromolecule metabolic process;cellular metabolic process;cellular nitrogen compound metabolic process;cellular process;columnar/cuboidal epithelial cell development;dephosphorylation;developmental process;epithelial cell development;g…	carbohydrate phosphatase activity;catalytic activity;fructose-2,6-bisphosphate 2-phosphatase activity;hydrolase activity;hydrolase activity, acting on ester bonds;phosphatase activity;phosphoric ester hydrolase activity;sugar-phosphatase activity	cell part;cytoplasmic part;cytosol;intracellular;intracellular part	23.3715	21.7999	21.3415	20.9917	24.3223	22.1216	22.3027	26.8932
B4E1S3;B2R9T9;Q9BVC6	Transmembrane protein 109	TMEM109	2.02423	1.49145	3	3	98	98	24983	48688	31649000	5	biological regulation;cellular process;cellular response to abiotic stimulus;cellular response to gamma radiation;cellular response to ionizing radiation;cellular response to radiation;cellular response to stimulus;cellular response to stress;DNA damage response, signal transduction by p53 class mediator;DNA damage response, signal transduction by p53 class mediator resulting in induction of apop…		cell part;cytoplasmic part;endoplasmic reticulum membrane;endoplasmic reticulum part;extracellular membrane-bounded organelle;extracellular organelle;extracellular region part;extracellular vesicular exosome;integral to membrane;intracellular organelle part;intracellular part;intrinsic to membrane;membrane;membrane part;membrane-bounded organelle;membrane-bounded vesicle;nuclear membrane;nuclear …	21.4752	21.3226	20.9964	21.0988	23.9788	24.2603	23.6338	21.1169
A0A024QZB0;Q6P3S6	F-box only protein 42	FBXO42	2.02401	1.83038	7	7	123	123	77838	14127	33226000	10				20.7805	20.6789	21.0821	20.9422	24.2084	22.0003	23.5754	21.7956
B4DXH2;B4DUZ3;A0A087X1E4;P53365	Arfaptin-2	ARFIP2	2.02219	3.83831	2	2	56	56	35758	4897	40549000	8	actin cytoskeleton organization;actin filament-based process;biological regulation;cell projection assembly;cell projection organization;cellular component assembly;cellular component assembly at cellular level;cellular component movement;cellular component organization;cellular component organization at cellular level;cellular component organization or biogenesis;cellular component organization …	binding;enzyme binding;GTP binding;GTPase binding;GTP-dependent protein binding;guanyl nucleotide binding;guanyl ribonucleotide binding;lipid binding;nucleotide binding;phosphatidylinositol binding;phosphatidylinositol-4-phosphate binding;phospholipid binding;protein binding;purine nucleotide binding;purine ribonucleoside triphosphate binding;purine ribonucleotide binding;Rac GTPase binding;Ras G…	cell cortex;cell part;cell projection;cytoplasm;cytoplasmic part;Golgi apparatus part;Golgi membrane;intracellular organelle part;intracellular part;membrane;organelle membrane;organelle part;plasma membrane;ruffle;trans-Golgi network membrane	20.8529	21.2349	20.9304	20.924	22.4391	23.1455	23.5037	22.9427
E9PH64;Q9Y6M9;B7Z7N1;E7EWZ0;E9PF49;Q9UQS5	NADH dehydrogenase [ubiquinone] 1 beta subcomplex subunit 9	NDUFB9	2.01526	2.0899	6	6	429	429	20383	47922	361450000	38	cellular metabolic process;cellular process;electron transport chain;generation of precursor metabolites and energy;metabolic process;mitochondrial electron transport, NADH to ubiquinone;multicellular organismal process;neurological system process;oxidation-reduction process;respiratory electron transport chain;sensory perception;sensory perception of mechanical stimulus;sensory perception of sou…	catalytic activity;NADH dehydrogenase (quinone) activity;NADH dehydrogenase (ubiquinone) activity;NADH dehydrogenase activity;oxidoreductase activity;oxidoreductase activity, acting on NADH or NADPH;oxidoreductase activity, acting on NADH or NADPH, quinone or similar compound as acceptor	cell part;cytoplasmic part;extracellular membrane-bounded organelle;extracellular organelle;extracellular region part;extracellular vesicular exosome;intracellular membrane-bounded organelle;intracellular organelle;intracellular organelle part;intracellular part;macromolecular complex;membrane;membrane part;membrane-bounded organelle;membrane-bounded vesicle;mitochondrial inner membrane;mitochond…	24.9996	23.6189	24.5843	25.7533	26.2397	26.5433	26.7414	27.4927
H3BM84;B4DIF6;Q53FN6;Q9BZW5	Transmembrane 6 superfamily member 1	TM6SF1	2.01516	2.06542	1	1	84	84	19143	28554	3436900	2			cell part;cytoplasmic part;integral to membrane;intracellular organelle part;intracellular part;intrinsic to membrane;lysosomal membrane;membrane;membrane part;organelle membrane;organelle part;vacuolar membrane;vacuolar part	19.4441	19.6042	20.1831	19.3505	20.2974	22.3329	21.5911	22.4213
A8K8N3;Q96R06	Sperm-associated antigen 5	SPAG5	2.00959	3.60663	21	21	224	224	13439	11331	383520000	63	biological regulation;cell cycle process;cell division;cellular component organization;cellular component organization at cellular level;cellular component organization or biogenesis;cellular component organization or biogenesis at cellular level;cellular process;chromosome organization;chromosome segregation;cytoskeleton organization;establishment of localization;establishment of localization in…	catalytic activity;transferase activity;transferase activity, transferring phosphorus-containing groups	cell part;chromosomal part;condensed chromosome kinetochore;cytoplasm;cytoplasmic part;cytoskeletal part;intracellular membrane-bounded organelle;intracellular non-membrane-bounded organelle;intracellular organelle;intracellular organelle part;intracellular part;kinetochore;macromolecular complex;membrane-bounded organelle;microtubule;microtubule organizing center;microtubule plus end;midbody;mit…	24.7946	24.9229	25.2546	25.1256	26.3926	26.9857	27.5106	27.2473
B4DGU2;B2RBI8;Q13088;P37275;B4DS26;B4DSB8;A0JLS9	Zinc finger E-box-binding homeobox 1	ZEB1	2.00857	3.08291	2	2	26	26	99335	49747	16459000	6	anatomical structure development;anatomical structure morphogenesis;biological regulation;biosynthetic process;cartilage development;cell proliferation;cellular biosynthetic process;cellular macromolecule biosynthetic process;cellular macromolecule metabolic process;cellular metabolic process;cellular nitrogen compound metabolic process;cellular process;cellular response to acid;cellular response…	binding;cation binding;chromatin binding;DNA binding;double-stranded DNA binding;E-box binding;ion binding;metal ion binding;nucleic acid binding;nucleic acid binding transcription factor activity;protein binding transcription factor activity;regulatory region DNA binding;regulatory region nucleic acid binding;sequence-specific DNA binding transcription factor activity;structure-specific DNA bind…	cell part;cytoplasm;intracellular membrane-bounded organelle;intracellular organelle;intracellular organelle part;intracellular part;macromolecular complex;membrane-bounded organelle;nuclear part;nucleoplasm;nucleoplasm part;nucleus;organelle;organelle part;protein complex;transcription factor complex	20.3346	20.8236	20.6982	20.6567	21.7622	22.7586	23.2066	22.8199
A0A140VK05;B4DN86;Q92667;I3L0W0	A-kinase anchor protein 1, mitochondrial	AKAP1	2.00478	4.31901	9	9	116	116	9734	28662	80096000	23	biological regulation;blood coagulation;coagulation;hemostasis;multicellular organismal process;regulation of biological quality;regulation of body fluid levels	binding;catalytic activity;kinase activity;nucleic acid binding;RNA binding;transferase activity;transferase activity, transferring phosphorus-containing groups	cell part;cytoplasmic part;cytosol;integral to membrane;intracellular membrane-bounded organelle;intracellular organelle;intracellular organelle part;intracellular part;intrinsic to membrane;membrane;membrane part;membrane-bounded organelle;mitochondrial membrane;mitochondrial outer membrane;mitochondrial part;mitochondrion;organelle;organelle membrane;organelle outer membrane;organelle part;oute…	22.6626	22.4544	22.8947	23.0661	24.3627	24.8358	24.9121	24.9863
Q76LA1;P04080;A0A1W2PQG6;A0A1W2PS52	Cystatin-B	CSTB	2.00307	1.19318	4	4	459	459	11139	41185	278720000	22	adult behavior;adult locomotory behavior;behavior;biological regulation;locomotory behavior;multicellular organismal process;negative regulation of biological process;negative regulation of catalytic activity;negative regulation of cellular metabolic process;negative regulation of cellular process;negative regulation of cellular protein metabolic process;negative regulation of endopeptidase activ…	binding;cysteine-type endopeptidase inhibitor activity;endopeptidase inhibitor activity;endopeptidase regulator activity;enzyme binding;enzyme inhibitor activity;enzyme regulator activity;peptidase inhibitor activity;peptidase regulator activity;protease binding;protein binding	cell part;cytoplasm;extracellular membrane-bounded organelle;extracellular organelle;extracellular region part;extracellular space;extracellular vesicular exosome;intracellular non-membrane-bounded organelle;intracellular organelle;intracellular organelle part;intracellular part;membrane-bounded organelle;membrane-bounded vesicle;non-membrane-bounded organelle;nuclear part;nucleolus;organelle;org…	25.1288	24.1938	23.8569	23.6892	25.1622	25.165	25.9207	28.633
Q13043;Q59FZ4;A0PJ51;F5H5B4;Q5H9T5	Serine/threonine-protein kinase 4;Serine/threonine-protein kinase 4 37kDa subunit;Serine/threonine-protein kinase 4 18kDa subunit	STK4;DKFZp686A2068	2.00272	4.23203	7	7	179	179	5563	28447	313590000	32	activation of MAPKK activity;activation of protein kinase activity;anatomical structure development;anatomical structure formation involved in morphogenesis;anatomical structure morphogenesis;apoptosis;biological regulation;branching morphogenesis of a tube;cell death;cell differentiation;cell differentiation involved in embryonic placenta development;cell morphogenesis;cell surface receptor link…	adenyl nucleotide binding;adenyl ribonucleotide binding;ATP binding;binding;catalytic activity;cation binding;enzyme activator activity;enzyme regulator activity;identical protein binding;ion binding;kinase activator activity;kinase activity;kinase regulator activity;magnesium ion binding;MAP kinase kinase kinase activity;metal ion binding;molecular transducer activity;nucleotide binding;phosphot…	cell part;cytoplasm;cytoplasmic part;cytosol;integral to membrane;intracellular membrane-bounded organelle;intracellular organelle;intracellular organelle part;intracellular part;intrinsic to membrane;membrane part;membrane-bounded organelle;nuclear part;nucleoplasm;nucleus;organelle;organelle part	24.6471	24.5995	24.6134	24.8719	26.2579	26.9994	27.0135	26.472
F8VQD4;Q8TAD7	Overexpressed in colon carcinoma 1 protein	C12orf75;OCC1	1.99387	1.80054	2	2	404	404	93362	29822	82779000	8				22.362	22.4977	22.3742	21.8825	25.0816	25.412	22.9554	23.6428
E9PM31;H0YEE2;E9PJK1;E9PRJ8;H0YDL9;H0YDJ9;A0A024RCB7;E9PIF1;A6NMH8;P60033	Tetraspanin;CD81 antigen	CD81	1.9853	1.16248	1	1	217	217	10027	52048	54214000	9	activation of MAPK activity;biological regulation;biosynthetic process;cell proliferation;cellular biosynthetic process;cellular lipid metabolic process;cellular macromolecule metabolic process;cellular metabolic process;cellular process;cellular protein metabolic process;entry into cell of other organism involved in symbiotic interaction;entry into host;entry into host cell;entry into other orga…	antigen binding;binding;MHC class II protein complex binding;MHC protein complex binding	adherens junction;anchoring junction;cell junction;cell part;cell-substrate adherens junction;cell-substrate junction;extracellular membrane-bounded organelle;extracellular organelle;extracellular region part;extracellular vesicular exosome;focal adhesion;immunological synapse;integral to membrane;integral to plasma membrane;intrinsic to membrane;intrinsic to plasma membrane;membrane;membrane par…	22.2797	22.106	21.8029	21.6723	24.381	24.8113	25.262	21.3478
Q6FHJ5;O14828	Secretory carrier-associated membrane protein 3	SCAMP3	1.9846	2.64909	9	9	392	392	38242	18318	528400000	73	cellular process;establishment of localization;establishment of localization in cell;establishment of protein localization;Golgi vesicle transport;intracellular transport;post-Golgi vesicle-mediated transport;protein transport;response to chemical stimulus;response to external stimulus;response to extracellular stimulus;response to nutrient;response to nutrient levels;response to retinoic acid;re…	binding;enzyme binding;protein binding;ubiquitin protein ligase binding	cell part;cytoplasmic part;extracellular membrane-bounded organelle;extracellular organelle;extracellular region part;extracellular vesicular exosome;Golgi apparatus part;Golgi membrane;integral to membrane;intracellular organelle part;intracellular part;intrinsic to membrane;membrane;membrane part;membrane-bounded organelle;membrane-bounded vesicle;organelle;organelle membrane;organelle part;ves…	25.9616	25.0371	24.8197	25.0949	27.6246	26.9959	27.7596	26.4715
K7EM09;K7EPR0;K7ELQ9;A0A024R7D3;Q6UW68	Transmembrane protein 205	TMEM205;UNQ501	1.97988	0.896447	3	3	267	267	13389	16005	253390000	18			cell part;extracellular membrane-bounded organelle;extracellular organelle;extracellular region part;extracellular vesicular exosome;integral to membrane;intrinsic to membrane;membrane part;membrane-bounded organelle;membrane-bounded vesicle;organelle;vesicle	25.3039	25.282	21.8386	22.5008	26.9357	24.4435	24.7545	26.7111
B3KUY5;Q8WTW3;A0A087WVI0;Q4G0L8;E9PBL8	Conserved oligomeric Golgi complex subunit 1	COG1	1.96192	3.04875	10	10	125	125	99283	94884	692160000	31	cellular component organization;cellular component organization at cellular level;cellular component organization or biogenesis;cellular component organization or biogenesis at cellular level;cellular process;establishment of localization;establishment of localization in cell;establishment of protein localization;Golgi organization;Golgi vesicle transport;intracellular transport;intra-Golgi vesic…		cell part;cytoplasmic part;Golgi apparatus;Golgi apparatus part;Golgi membrane;Golgi transport complex;intracellular membrane-bounded organelle;intracellular organelle;intracellular organelle part;intracellular part;macromolecular complex;membrane;membrane-bounded organelle;organelle;organelle membrane;organelle part;protein complex	25.6179	26.2419	24.9387	25.8188	27.5871	27.8467	27.1372	27.894
A0A024RDY4;Q14186;F5H452;Q5JSB6;Q5JSB5;A0A024RBZ0	Transcription factor Dp-1	TFDP1;hCG_1982709	1.96136	1.7122	3	3	117	117	4507	10324	9805100	4	apoptosis;biological regulation;biosynthetic process;cell cycle;cell cycle process;cell death;cell proliferation;cell surface receptor linked signaling pathway;cellular biosynthetic process;cellular macromolecule biosynthetic process;cellular macromolecule metabolic process;cellular metabolic process;cellular nitrogen compound metabolic process;cellular process;cellular response to stimulus;death…	binding;DNA binding;nucleic acid binding;nucleic acid binding transcription factor activity;protein binding;protein binding transcription factor activity;protein domain specific binding;sequence-specific DNA binding RNA polymerase II transcription factor activity;sequence-specific DNA binding transcription factor activity;transcription coactivator activity;transcription cofactor activity;transcri…	cell part;intracellular membrane-bounded organelle;intracellular organelle;intracellular organelle part;intracellular part;macromolecular complex;membrane-bounded organelle;nuclear part;nucleoplasm;nucleoplasm part;nucleus;organelle;organelle part;protein complex;transcription factor complex	19.5644	19.6704	19.8886	21.803	22.4649	21.7579	22.9745	21.5746
Q14126	Desmoglein-2	DSG2	1.95544	2.84761	5	5	63	63	12229	13991	22756000	5	anatomical structure development;apoptosis;biological adhesion;cardiac Purkinje fiber development;cell adhesion;cell death;cell-cell adhesion;cellular component disassembly;cellular component disassembly at cellular level;cellular component disassembly involved in apoptosis;cellular component organization;cellular component organization at cellular level;cellular component organization or biogene…	binding;calcium ion binding;cation binding;cell adhesion molecule binding;ion binding;metal ion binding;protein binding	anchoring junction;apical plasma membrane;cell junction;cell part;cell surface;cell-cell contact zone;cell-cell junction;desmosome;extracellular membrane-bounded organelle;extracellular organelle;extracellular region part;extracellular vesicular exosome;integral to membrane;intercalated disc;intrinsic to membrane;lateral plasma membrane;membrane;membrane part;membrane-bounded organelle;membrane-b…	20.8976	20.3242	20.7663	20.8757	23.6086	22.3094	22.5957	22.1718
B2R9H3;A0A024R2B1;P50452	Serpin B8	SERPINB8	1.94548	2.10783	2	2	51	51	42754	50912	28549000	7	biological regulation;negative regulation of catalytic activity;negative regulation of endopeptidase activity;negative regulation of hydrolase activity;negative regulation of molecular function;negative regulation of peptidase activity;regulation of biological process;regulation of catalytic activity;regulation of endopeptidase activity;regulation of hydrolase activity;regulation of metabolic pro…	endopeptidase inhibitor activity;endopeptidase regulator activity;enzyme inhibitor activity;enzyme regulator activity;peptidase inhibitor activity;peptidase regulator activity;serine-type endopeptidase inhibitor activity	cell part;cytoplasmic part;cytosol;extracellular membrane-bounded organelle;extracellular organelle;extracellular region part;extracellular space;extracellular vesicular exosome;intracellular part;membrane-bounded organelle;membrane-bounded vesicle;organelle;vesicle	20.6963	21.3886	22.4322	21.5277	22.4266	23.7103	23.8689	23.821
B4DM19;B4DZF1;Q9UHD9;Q9H8R7	Ubiquilin-2	UBQLN2	1.94443	2.62911	1	1	33	33	52921	83863	19744000	5	biological regulation;regulation of autophagic vacuole assembly;regulation of autophagy;regulation of biological process;regulation of catabolic process;regulation of cell communication;regulation of cellular catabolic process;regulation of cellular component biogenesis;regulation of cellular component organization;regulation of cellular metabolic process;regulation of cellular process;regulation…		cell part;cytoplasm;intracellular membrane-bounded organelle;intracellular organelle;intracellular part;membrane;membrane-bounded organelle;nucleus;organelle;plasma membrane	20.6634	20.7626	21.1479	21.0687	21.8535	22.7565	23.4319	23.3785
Q2NKQ5;Q16799;B7Z4K5;A8MT72;Q6IAX4;A8K3B9	Reticulon;Reticulon-1	RTN1	1.94202	1.20222	2	2	26	26	76244	23975	41112000	5	cell differentiation;cellular developmental process;cellular process;developmental process;neuron differentiation		cell part;cytoplasmic part;endoplasmic reticulum membrane;endoplasmic reticulum part;integral to endoplasmic reticulum membrane;integral to membrane;integral to organelle membrane;intracellular organelle part;intracellular part;intrinsic to endoplasmic reticulum membrane;intrinsic to membrane;intrinsic to organelle membrane;membrane;membrane part;organelle membrane;organelle part	22.5342	19.2024	22.5039	22.2467	22.808	23.9693	23.9001	23.5778
Q05CP8;A0A024QZJ7;Q16204	Coiled-coil domain-containing protein 6	CCDC6	1.93647	5.74867	9	9	24	24	38163	27609	69457000	20		structural constituent of cytoskeleton;structural molecule activity	cell part;cytoplasm;cytoskeleton;intracellular non-membrane-bounded organelle;intracellular organelle;intracellular part;non-membrane-bounded organelle;organelle	21.9902	22.3378	22.3855	22.4462	24.1961	24.2773	24.1579	24.2742
A0A0F7NGI8;Q32MZ4	Leucine-rich repeat flightless-interacting protein 1	LRRFIP1	1.93058	3.33878	15	14	218	202	82688	5872	226980000	53	biological regulation;biosynthetic process;cellular biosynthetic process;cellular macromolecule biosynthetic process;cellular macromolecule metabolic process;cellular metabolic process;cellular nitrogen compound metabolic process;cellular process;defense response;immune response;immune system process;innate immune response;macromolecule biosynthetic process;macromolecule metabolic process;metabol…	binding;DNA binding;double-stranded RNA binding;identical protein binding;nucleic acid binding;protein binding;protein dimerization activity;protein homodimerization activity;RNA binding	cell part;cytoplasm;cytoplasmic part;cytoskeleton;cytosol;intracellular membrane-bounded organelle;intracellular non-membrane-bounded organelle;intracellular organelle;intracellular part;membrane;membrane-bounded organelle;non-membrane-bounded organelle;nucleus;organelle;plasma membrane	24.041	24.3568	24.4102	24.6462	25.5823	26.5214	26.7338	26.3391
A0A024R5B9;Q8N9N8;E9PQD0;E9PS30;E9PLI6;E9PS76	Probable RNA-binding protein EIF1AD	MGC11102;EIF1AD	1.91025	1.73167	3	3	291	291	19053	35071	69030000	8		binding;nucleic acid binding;RNA binding;translation factor activity, nucleic acid binding;translation initiation factor activity	cell part;cytoskeleton;intermediate filament cytoskeleton;intracellular membrane-bounded organelle;intracellular non-membrane-bounded organelle;intracellular organelle;intracellular organelle part;intracellular part;membrane-bounded organelle;non-membrane-bounded organelle;nuclear part;nucleoplasm;organelle;organelle part	21.7446	22.0277	22.0445	21.8589	25.477	23.8023	22.7194	23.318
B2R6F5;A0A1B2JLU2;O75695	Protein XRP2	RP2	1.88795	2.99204	5	5	114	114	39625	69854	104310000	19	anatomical structure morphogenesis;biological regulation;biosynthetic process;cell morphogenesis;cellular biosynthetic process;cellular component morphogenesis;cellular component organization;cellular component organization at cellular level;cellular component organization or biogenesis;cellular component organization or biogenesis at cellular level;cellular developmental process;cellular macromo…	adenyl nucleotide binding;adenyl ribonucleotide binding;ATP binding;binding;catalytic activity;enzyme activator activity;enzyme regulator activity;GTP binding;GTPase activator activity;GTPase regulator activity;guanyl nucleotide binding;guanyl ribonucleotide binding;kinase activity;nucleobase-containing compound kinase activity;nucleoside diphosphate kinase activity;nucleoside-triphosphatase regu…	cell part;cell projection;centriole;cilium;cytoplasm;cytoplasmic part;cytoplasmic vesicle;cytoskeletal part;extracellular membrane-bounded organelle;extracellular organelle;extracellular region part;extracellular vesicular exosome;Golgi apparatus;intracellular membrane-bounded organelle;intracellular non-membrane-bounded organelle;intracellular organelle;intracellular organelle part;intracellular…	22.7055	23.3713	23.2147	23.6469	24.5543	25.6987	25.3297	24.9075
B7Z5M7;Q7RU07;B2R6I5;Q7Z509;O95807	Transmembrane protein 50A	SMP1;TMEM50A	1.88726	1.20087	1	1	63	63	13995	23607	9111800	2			cell part;cytoplasm;cytoplasmic part;endoplasmic reticulum;integral to membrane;intracellular membrane-bounded organelle;intracellular organelle;intracellular part;intrinsic to membrane;membrane part;membrane-bounded organelle;organelle	19.0149	19.0188	21.1393	22.1453	22.7425	22.3685	21.4856	22.2707
J3QRU4;F8WCA0;L7N2F9;P63027	Vesicle-associated membrane protein 2	VAMP2	1.88075	2.93272	5	3	619	407	12251	35837	82612000	19	biological regulation;calcium ion-dependent exocytosis;cell activation;cell activation involved in immune response;cell communication;cell-cell signaling;cellular component assembly;cellular component organization;cellular component organization at cellular level;cellular component organization or biogenesis;cellular component organization or biogenesis at cellular level;cellular macromolecule me…	binding;calcium-dependent protein binding;calmodulin binding;lipid binding;phospholipid binding;protein binding;protein self-association;SNAP receptor activity;SNARE binding;syntaxin binding;syntaxin-1 binding	cell junction;cell part;cell projection;cell projection part;clathrin coated vesicle membrane;clathrin sculpted gamma-aminobutyric acid transport vesicle membrane;clathrin sculpted glutamate transport vesicle membrane;clathrin sculpted monoamine transport vesicle membrane;clathrin-coated vesicle;coated vesicle;coated vesicle membrane;cytoplasmic membrane-bounded vesicle;cytoplasmic part;cytoplasm…	23.0738	22.2376	22.7082	22.946	25.0611	23.9161	24.4965	25.0149
A0A024R565;Q9UI30;F5GYQ2;F5GX77	Multifunctional methyltransferase subunit TRM112-like protein	HSPC152;TRMT112	1.88024	0.835336	3	3	328	328	14199	77425	369490000	23	cellular macromolecule metabolic process;cellular metabolic process;cellular process;cellular protein metabolic process;macromolecule metabolic process;macromolecule methylation;macromolecule modification;metabolic process;methylation;one-carbon metabolic process;peptidyl-glutamine methylation;primary metabolic process;protein alkylation;protein metabolic process;protein methylation;protein modif…	catalytic activity;methyltransferase activity;protein methyltransferase activity;transferase activity;transferase activity, transferring one-carbon groups	extracellular membrane-bounded organelle;extracellular organelle;extracellular region part;extracellular vesicular exosome;macromolecular complex;membrane-bounded organelle;membrane-bounded vesicle;organelle;protein complex;vesicle	25.5325	23.7351	23.6295	23.4831	25.7633	24.3566	24.8784	28.9027
C9JJV6;C9JZL8;C9J5M0;C9JC07;B4DG42;A0A024R4N0;Q96S97	Myeloid-associated differentiation marker	MYADM;hCG_1640809	1.87943	0.796048	1	1	158	158	15864	44175	95634000	17	anatomical structure development;biological regulation;cell development;cellular component organization;cellular component organization or biogenesis;cellular developmental process;cellular membrane organization;cellular process;developmental process;endothelial cell development;epithelial cell development;establishment of endothelial barrier;establishment of localization;establishment of localiz…		cell cortex part;cell junction;cell part;cell projection;cell-cell junction;cortical actin cytoskeleton;cortical cytoskeleton;cytoplasmic part;cytoskeletal part;cytoskeleton;extracellular membrane-bounded organelle;extracellular organelle;extracellular region part;extracellular vesicular exosome;integral to membrane;intracellular non-membrane-bounded organelle;intracellular organelle;intracellula…	23.2539	21.339	21.9668	21.1904	23.508	22.2206	22.6045	26.9347
B3KSI1;B2RBP7;Q9H4E7	Differentially expressed in FDCP 6 homolog	DEF6	1.87492	3.44668	19	19	505	505	44363	13389	1530600000	136			cell junction;cell part;cell-cell junction;cytoplasm;cytoplasmic microtubule;cytoplasmic part;cytoskeletal part;intracellular membrane-bounded organelle;intracellular organelle;intracellular organelle part;intracellular part;macromolecular complex;membrane;membrane-bounded organelle;microtubule;nucleus;organelle;organelle part;plasma membrane;protein complex	27.0546	26.9783	27.1346	26.7789	29.5853	28.4964	28.7762	28.5881
A0A087WZ51;Q68E05;Q6FGS1;Q53GA0;O43399;A0A087WYR3	Tumor protein D54	TPD52L2;DKFZp686A1765	1.85109	3.4239	3	3	414	414	16306	15403	45651000	9	biological regulation;regulation of biological process;regulation of cell proliferation;regulation of cellular process	binding;identical protein binding;protein binding;protein dimerization activity;protein heterodimerization activity;protein homodimerization activity	cell part;cytoplasm;cytoplasmic part;intracellular part;perinuclear region of cytoplasm	21.6541	21.8644	21.8664	22.1814	23.3875	23.3088	24.0022	24.2721
B4E0R1;D3DSM0;P05107;Q8WWJ8;Q59H50;J3KNI6	Integrin beta;Integrin beta-2	ITGB2	1.84516	2.15359	7	7	134	134	77354	38306	116260000	16	activated T cell proliferation;activation of immune response;activation of innate immune response;aging;apoptosis;biological adhesion;biological regulation;blood coagulation;cell activation;cell adhesion;cell chemotaxis;cell communication;cell death;cell differentiation;cell migration;cell motility;cell proliferation;cell surface receptor linked signaling pathway;cell-cell adhesion;cell-cell sign…	binding;cation binding;cell adhesion molecule binding;enzyme binding;glycoprotein binding;ICAM-3 receptor activity;ion binding;kinase binding;metal ion binding;molecular transducer activity;protein binding;protein kinase binding;receptor activity;signal transducer activity;signaling receptor activity;transmembrane signaling receptor activity	alphaL-beta2 integrin complex;cell part;cell surface;extracellular membrane-bounded organelle;extracellular organelle;extracellular region part;extracellular vesicular exosome;integrin complex;macromolecular complex;membrane;membrane part;membrane raft;membrane-bounded organelle;membrane-bounded vesicle;organelle;plasma membrane;plasma membrane part;protein complex;receptor complex;vesicle	23.2031	23.5333	23.7382	22.9804	25.4687	24.6269	24.4377	26.3022
F1T0F0;Q6QNY1	Biogenesis of lysosome-related organelles complex 1 subunit 2	BLOC1S2	1.84222	2.03405	1	1	77	77	15961	37681	23792000	5	anterograde axon cargo transport;anterograde synaptic vesicle transport;axon cargo transport;biological regulation;cell projection organization;cellular component movement;cellular component organization;cellular component organization at cellular level;cellular component organization or biogenesis;cellular component organization or biogenesis at cellular level;cellular process;cytoskeleton organ…	binding;cytoskeletal protein binding;gamma-tubulin binding;protein binding;protein C-terminus binding;tubulin binding	BLOC complex;BLOC-1 complex;cell part;centrosome;cytoplasmic part;cytoskeletal part;cytosol;cytosolic part;endosome;gamma-tubulin complex;intracellular membrane-bounded organelle;intracellular non-membrane-bounded organelle;intracellular organelle;intracellular organelle part;intracellular part;macromolecular complex;membrane-bounded organelle;microtubule organizing center;microtubule organizing …	20.664	21.3278	21.6258	21.5356	22.4542	23.8236	23.9453	22.299
P60468;Q53FA5	Protein transport protein Sec61 subunit beta	SEC61B	1.82705	2.71231	3	3	375	375	99743	1076	206630000	16	antigen processing and presentation;antigen processing and presentation of exogenous antigen;antigen processing and presentation of exogenous peptide antigen;antigen processing and presentation of exogenous peptide antigen via MHC class I;antigen processing and presentation of exogenous peptide antigen via MHC class I, TAP-dependent;antigen processing and presentation of peptide antigen;antigen p…	binding;epidermal growth factor binding;growth factor binding;hormone binding;protein binding	cell part;cytoplasmic part;cytosol;endoplasmic reticulum;endoplasmic reticulum membrane;endoplasmic reticulum part;endoplasmic reticulum Sec complex;integral to membrane;intracellular membrane-bounded organelle;intracellular organelle;intracellular organelle part;intracellular part;intrinsic to membrane;macromolecular complex;membrane;membrane part;membrane-bounded organelle;organelle;organelle m…	23.6569	24.5088	24.589	24.7403	25.4866	26.4975	26.5842	26.235
X6RI56;B3KMR6;A0A024R3T3;O94886	CSC1-like protein 1	TMEM63A	1.81624	1.64846	1	1	102	102	13328	2933	5928900	1	establishment of localization;ion transport;transport	binding;nucleotide binding	cell part;cytoplasmic part;extracellular membrane-bounded organelle;extracellular organelle;extracellular region part;extracellular vesicular exosome;integral to membrane;intracellular organelle part;intracellular part;intrinsic to membrane;lysosomal membrane;membrane;membrane part;membrane-bounded organelle;membrane-bounded vesicle;organelle;organelle membrane;organelle part;vacuolar membrane;va…	19.361	19.5435	19.8536	19.6305	21.858	19.8719	21.2727	22.651
A3KPC7;A0A024RAS2;Q08AJ9;B2R5B3;A4FTV9;A0A024R017;A0A0U1RR32;A0A0U1RRH7;Q99878;Q96KK5;Q9BTM1;Q16777;Q93077;Q7L7L0;Q6FI13;P20671;P0C0S8;P04908;V9GZN0;H0YFX9;B4E0B3;C9J0D1;B2R5B6;Q71UI9;P0C0S5;Q8IUE6;Q96QV6;P16104	Histone H2A;Histone H2A type 1-J;Histone H2A type 1-H;Histone H2A.J;Histone H2A type 2-C;Histone H2A type 1-C;Histone H2A type 3;Histone H2A type 2-A;Histone H2A type 1-D;Histone H2A type 1;Histone H2A type 1-B/E;Histone H2A.V;Histone H2A.Z;Histone H2A type 2-B;Histone H2A type 1-A;Histone H2AX	HIST1H2AH;H2AFJ;HIST1H2AB;HIST1H2AK;HIST1H2AC;HIST1H2AJ;HIST2H2AC;HIST3H2A;HIST2H2AA3;HIST1H2AD;HIST1H2AG;H2AFV;H2AFZ;HIST2H2AB;HIST1H2AA;H2AFX	1.81237	1.11255	2	2	219	219	13906	13122	144260000	13	biological regulation;cell cycle;cell cycle checkpoint;cellular component assembly;cellular component assembly at cellular level;cellular component disassembly;cellular component disassembly at cellular level;cellular component organization;cellular component organization at cellular level;cellular component organization or biogenesis;cellular component organization or biogenesis at cellular leve…	binding;chromatin binding;chromatin DNA binding;core promoter binding;core promoter proximal region DNA binding;core promoter proximal region sequence-specific DNA binding;core promoter sequence-specific DNA binding;damaged DNA binding;DNA binding;enhancer binding;enhancer sequence-specific DNA binding;enzyme binding;histone binding;nucleic acid binding;nucleosomal DNA binding;nucleosome binding;…	cell part;chromatin;chromosomal part;chromosome;condensed chromosome;condensed nuclear chromosome;euchromatin;extracellular membrane-bounded organelle;extracellular organelle;extracellular region part;extracellular vesicular exosome;germ cell nucleus;heterochromatin;intracellular membrane-bounded organelle;intracellular non-membrane-bounded organelle;intracellular organelle;intracellular organell…	23.0603	23.5236	23.5204	23.8587	24.6788	23.5064	25.5614	27.4659
A0A024R6T8;Q9GZU8;H3BTP8;H3BSY6;H3BP64;H3BUL4;H3BMX9;H3BQQ6;H3BTI2;Q6P4H7;H3BSF0;H3BU93	Protein FAM192A	NIP30;FAM192A	1.8072	3.79836	8	3	315	114	28912	58752	130850000	15			cell part;intracellular membrane-bounded organelle;intracellular organelle;intracellular part;membrane-bounded organelle;nucleus;organelle	23.1248	23.9023	23.8376	23.199	25.1751	25.5019	25.3047	25.3108
G4WMG7;A0A0K0L4Y0;Q96AD5;L7NSP5;A0A0U1WL47;A0A0K0L4Y8;A0A1W6R6W1	Patatin-like phospholipase domain-containing protein 2	PNPLA2;ATGL	1.8063	1.64193	5	5	145	145	55256	3364	43273000	7	acylglycerol catabolic process;acylglycerol metabolic process;biological regulation;biosynthetic process;catabolic process;cellular biosynthetic process;cellular catabolic process;cellular component organization;cellular component organization at cellular level;cellular component organization or biogenesis;cellular component organization or biogenesis at cellular level;cellular lipid catabolic pr…	carboxylic ester hydrolase activity;catalytic activity;hydrolase activity;hydrolase activity, acting on ester bonds;lipase activity;triglyceride lipase activity	cell part;cytoplasmic part;cytosol;endoplasmic reticulum membrane;endoplasmic reticulum part;integral to membrane;intracellular membrane-bounded organelle;intracellular organelle;intracellular organelle part;intracellular part;intrinsic to membrane;lipid particle;membrane;membrane part;membrane-bounded organelle;organelle;organelle membrane;organelle part;plasma membrane	21.6954	22.1826	21.9643	20.9997	25.0907	23.1486	22.6852	23.1427
A0A024R2Q9;Q9NWU1;C9J2G3;C9JQQ2	3-oxoacyl-[acyl-carrier-protein] synthase, mitochondrial	OXSM	1.79568	2.3688	3	3	133	133	48842	61294	129550000	19	acyl-CoA metabolic process;biosynthetic process;carboxylic acid biosynthetic process;carboxylic acid metabolic process;cellular biosynthetic process;cellular ketone metabolic process;cellular lipid metabolic process;cellular metabolic process;cellular process;coenzyme metabolic process;cofactor metabolic process;fatty acid biosynthetic process;fatty acid metabolic process;lipid biosynthetic proce…	3-oxoacyl-[acyl-carrier-protein] synthase activity;catalytic activity;fatty acid synthase activity;transferase activity;transferase activity, transferring acyl groups;transferase activity, transferring acyl groups other than amino-acyl groups	cell part;cytoplasm;cytoplasmic part;intracellular membrane-bounded organelle;intracellular organelle;intracellular part;membrane-bounded organelle;mitochondrion;organelle	23.0332	23.3073	23.6411	23.0496	26.1689	24.5198	24.8005	24.7247
Q5VV42	Threonylcarbamoyladenosine tRNA methylthiotransferase	CDKAL1	1.79197	3.20928	14	14	297	297	65111	64458	341450000	60		4 iron, 4 sulfur cluster binding;binding;catalytic activity;cation binding;ion binding;iron-sulfur cluster binding;metal cluster binding;metal ion binding;methylthiotransferase activity;N6-threonylcarbomyladenosine methylthiotransferase activity;transferase activity;transferase activity, transferring alkylthio groups;transferase activity, transferring sulfur-containing groups	cell part;cytoplasmic part;endoplasmic reticulum;endoplasmic reticulum membrane;endoplasmic reticulum part;integral to membrane;intracellular membrane-bounded organelle;intracellular organelle;intracellular organelle part;intracellular part;intrinsic to membrane;membrane;membrane part;membrane-bounded organelle;organelle;organelle membrane;organelle part;rough endoplasmic reticulum	24.9683	25.0495	24.508	24.1832	26.911	26.0103	26.5147	26.4408
B2R7E8;P15927;B4DQD9;Q5TEJ7	Replication protein A 32 kDa subunit	RPA2	1.78811	1.33244	4	4	267	267	29263	41308	132500000	15	anatomical structure homeostasis;base-excision repair;biological regulation;biosynthetic process;catabolic process;cell cycle;cell cycle checkpoint;cell cycle process;cellular biosynthetic process;cellular catabolic process;cellular component assembly;cellular component assembly at cellular level;cellular component organization;cellular component organization at cellular level;cellular component …	binding;damaged DNA binding;DNA binding;enzyme binding;nucleic acid binding;phosphatase binding;protein binding;protein phosphatase binding;single-stranded DNA binding;structure-specific DNA binding;ubiquitin protein ligase binding	cell part;chromatin;chromosomal part;DNA replication factor A complex;intracellular membrane-bounded organelle;intracellular organelle;intracellular organelle part;intracellular part;macromolecular complex;membrane-bounded organelle;nuclear body;nuclear chromosome part;nuclear part;nucleoplasm;nucleoplasm part;nucleus;organelle;organelle part;PML body;protein complex	23.9271	23.8653	23.4869	21.6035	24.557	25.2738	26.1617	24.0427
A0A024R151;Q8WWI5	Choline transporter-like protein 1	SLC44A1	1.7814	3.2971	3	3	62	62	73301	83681	64801000	7	alcohol metabolic process;amine metabolic process;amine transport;biosynthetic process;cation transport;cellular amine metabolic process;cellular biogenic amine metabolic process;cellular biosynthetic process;cellular lipid metabolic process;cellular metabolic process;cellular nitrogen compound metabolic process;cellular process;choline transport;establishment of localization;ethanolamine-contain…	active transmembrane transporter activity;amine transmembrane transporter activity;choline transmembrane transporter activity;substrate-specific transmembrane transporter activity;substrate-specific transporter activity;transmembrane transporter activity;transporter activity	cell part;cytoplasmic part;extracellular membrane-bounded organelle;extracellular organelle;extracellular region part;extracellular vesicular exosome;integral to membrane;intracellular organelle part;intracellular part;intrinsic to membrane;membrane;membrane part;membrane-bounded organelle;membrane-bounded vesicle;mitochondrial membrane;mitochondrial outer membrane;mitochondrial part;organelle;or…	22.2382	23.0996	22.6395	22.4461	23.8918	24.324	24.7613	24.5718
Q69YH5;E9PEI0;B7Z5Q5	Cell division cycle-associated protein 2	CDCA2	1.77891	1.8822	9	1	171	18	11268	70516	95082000	15	biological regulation;cell cycle phase;cell cycle process;cell division;cellular component organization;cellular component organization at cellular level;cellular component organization or biogenesis;cellular component organization or biogenesis at cellular level;cellular process;chromosome segregation;mitosis;nuclear division;organelle fission;organelle organization;positive regulation of biolog…		cell part;chromosome;cytoplasm;intracellular non-membrane-bounded organelle;intracellular organelle;intracellular organelle part;intracellular part;non-membrane-bounded organelle;nuclear part;nucleoplasm;organelle;organelle part	22.623	22.2411	23.1492	23.5966	24.5626	23.9544	24.3381	25.8705
Q9BVQ7	Spermatogenesis-associated protein 5-like protein 1	SPATA5L1	1.77311	1.30599	8	8	118	118	80709	18656	140020000	14		adenyl nucleotide binding;adenyl ribonucleotide binding;ATP binding;binding;nucleotide binding;purine nucleotide binding;purine ribonucleoside triphosphate binding;purine ribonucleotide binding;ribonucleotide binding	cell part;cytoplasm;intracellular part	24.2693	24.3295	21.684	23.8402	24.2379	25.8253	25.4993	25.6529
A7E2E5;Q13370	cGMP-inhibited 3,5-cyclic phosphodiesterase B	PDE3B	1.77212	4.21158	14	14	173	173	12431	51229	205030000	45	anatomical structure development;anatomical structure formation involved in morphogenesis;angiogenesis;biological regulation;blood coagulation;cAMP catabolic process;cAMP metabolic process;cAMP-mediated signaling;carbohydrate homeostasis;catabolic process;cell maturation;cell surface receptor linked signaling pathway;cellular catabolic process;cellular developmental process;cellular lipid metabol…	3',5'-cyclic-AMP phosphodiesterase activity;3',5'-cyclic-nucleotide phosphodiesterase activity;adenyl nucleotide binding;adenyl ribonucleotide binding;AMP binding;binding;cAMP binding;catalytic activity;cation binding;cGMP-inhibited cyclic-nucleotide phosphodiesterase activity;cyclic nucleotide binding;cyclic-nucleotide phosphodiesterase activity;enzyme binding;hydrolase activity;hydrolase activi…	cell part;cytoplasmic part;cytosol;endoplasmic reticulum;Golgi apparatus;guanyl-nucleotide exchange factor complex;integral to membrane;intracellular membrane-bounded organelle;intracellular organelle;intracellular part;intrinsic to membrane;macromolecular complex;membrane;membrane part;membrane-bounded organelle;organelle;protein complex	23.9365	24.294	24.3228	24.5536	25.6747	26.1407	26.1619	26.2182
S4R3F4;S4R3C5;S4R2X1;B4DK89;B4E3K2;I6L9K0;S4R2Z0;Q53F11;Q9H3H1	tRNA dimethylallyltransferase, mitochondrial	TRIT1	1.77194	1.40823	1	1	159	159	62933	21914	3361400	3	cellular macromolecule metabolic process;cellular metabolic process;cellular nitrogen compound metabolic process;cellular process;macromolecule metabolic process;macromolecule modification;metabolic process;ncRNA metabolic process;ncRNA processing;nitrogen compound metabolic process;nucleic acid metabolic process;nucleobase-containing compound metabolic process;primary metabolic process;RNA metab…	adenyl nucleotide binding;adenyl ribonucleotide binding;ATP binding;binding;catalytic activity;cation binding;ion binding;metal ion binding;nucleotide binding;purine nucleotide binding;purine ribonucleoside triphosphate binding;purine ribonucleotide binding;ribonucleotide binding;transferase activity;transferase activity, transferring alkyl or aryl (other than methyl) groups;tRNA dimethylallyltra…	cell part;cytoplasmic part;intracellular membrane-bounded organelle;intracellular organelle;intracellular part;membrane-bounded organelle;mitochondrion;organelle	19.8018	20.3217	19.2373	19.2259	19.9271	22.5093	20.8679	22.3702
B2RDG1;Q8WVX9;E9PNW8;Q9H600	Fatty acyl-CoA reductase 1	FAR1	1.77014	1.19785	6	6	138	138	59382	13607	86894000	8	acyl-CoA metabolic process;biosynthetic process;carboxylic acid biosynthetic process;carboxylic acid metabolic process;cellular biosynthetic process;cellular ketone metabolic process;cellular lipid metabolic process;cellular metabolic process;cellular process;coenzyme metabolic process;cofactor metabolic process;ether lipid biosynthetic process;ether lipid metabolic process;fatty acid biosyntheti…	catalytic activity;fatty-acyl-CoA reductase (alcohol-forming) activity;long-chain-fatty-acyl-CoA reductase activity;oxidoreductase activity;oxidoreductase activity, acting on the aldehyde or oxo group of donors;oxidoreductase activity, acting on the aldehyde or oxo group of donors, NAD or NADP as acceptor	cell part;cytoplasmic part;integral to membrane;intracellular membrane-bounded organelle;intracellular organelle;intracellular organelle lumen;intracellular organelle part;intracellular part;intrinsic to membrane;membrane;membrane part;membrane-bounded organelle;membrane-enclosed lumen;microbody;microbody lumen;microbody membrane;microbody part;organelle;organelle lumen;organelle membrane;organel…	23.8921	23.2407	21.6893	21.9848	23.9957	24.2069	23.5271	26.1577
Q53HT6;Q53G72;P51572	B-cell receptor-associated protein 31	BCAP31	1.76488	2.17444	17	17	39	39	27961	96905	2549900000	130	antigen processing and presentation;antigen processing and presentation of peptide antigen;antigen processing and presentation of peptide antigen via MHC class I;apoptosis;biological regulation;calcium ion homeostasis;calcium-mediated signaling;calcium-mediated signaling using intracellular calcium source;cation homeostasis;cell death;cellular calcium ion homeostasis;cellular cation homeostasis;c…		cell part;clathrin-coated vesicle;coated vesicle;cytoplasmic membrane-bounded vesicle;cytoplasmic part;cytoplasmic vesicle;cytosol;endoplasmic reticulum;endoplasmic reticulum membrane;endoplasmic reticulum part;endoplasmic reticulum-Golgi intermediate compartment membrane;Golgi apparatus part;Golgi cisterna membrane;Golgi membrane;integral to endoplasmic reticulum membrane;integral to lumenal sid…	27.6697	27.9796	27.5035	27.5919	29.8186	30.083	29.6968	28.2059
Q96MH2	Protein HEXIM2	HEXIM2	1.76247	0.863961	1	1	49	49	32418	24046	1784900	1	biological regulation;biosynthetic process;cellular biosynthetic process;cellular macromolecule biosynthetic process;cellular macromolecule metabolic process;cellular metabolic process;cellular nitrogen compound metabolic process;cellular process;macromolecule biosynthetic process;macromolecule metabolic process;metabolic process;negative regulation of biological process;negative regulation of bi…	binding;cyclin-dependent protein kinase inhibitor activity;cyclin-dependent protein kinase regulator activity;enzyme inhibitor activity;enzyme regulator activity;kinase inhibitor activity;kinase regulator activity;nucleic acid binding;protein kinase inhibitor activity;protein kinase regulator activity;protein serine/threonine kinase inhibitor activity;RNA binding;snRNA binding	cell part;cytoplasm;intracellular membrane-bounded organelle;intracellular organelle;intracellular organelle part;intracellular part;membrane-bounded organelle;nuclear part;nucleoplasm;nucleus;organelle;organelle part	19.0876	19.3875	19.8424	21.8784	22.8163	19.4194	22.1901	22.82
Q9BRF8;B3KSL3	Serine/threonine-protein phosphatase CPPED1	CPPED1	1.75263	2.38212	6	6	21	21	35548	14692	342580000	43		binding;catalytic activity;cation binding;hydrolase activity;hydrolase activity, acting on ester bonds;ion binding;metal ion binding;phosphatase activity;phosphoprotein phosphatase activity;phosphoric ester hydrolase activity	cell part;cytoplasm;extracellular membrane-bounded organelle;extracellular organelle;extracellular region part;extracellular vesicular exosome;intracellular part;membrane-bounded organelle;membrane-bounded vesicle;organelle;vesicle	24.5992	24.4621	24.7742	25.3375	27.0107	26.9683	26.6484	25.5561
K7ELV5;A0A024R8R3;Q00526	Cyclin-dependent kinase 3	CDK3	1.74565	3.48142	1	1	55	55	18812	25452	73518000	2	biological regulation;cell cycle phase;cell cycle process;cell division;cell proliferation;cellular component organization;cellular component organization at cellular level;cellular component organization or biogenesis;cellular component organization or biogenesis at cellular level;cellular process;G0 to G1 transition;G1/S transition of mitotic cell cycle;mitosis;nuclear division;organelle fissio…	adenyl nucleotide binding;adenyl ribonucleotide binding;ATP binding;binding;catalytic activity;cyclin-dependent protein kinase activity;kinase activity;nucleotide binding;phosphotransferase activity, alcohol group as acceptor;protein kinase activity;protein serine/threonine kinase activity;purine nucleotide binding;purine ribonucleoside triphosphate binding;purine ribonucleotide binding;ribonucle…		22.8629	22.8544	22.9565	22.9908	24.4165	24.5287	25.3598	24.3422
I3L0A5;B7Z5Z3;B3KU63;T2CZM2;F5H0I3;T2CYZ2;A0A024RB06;P35711;P35712	Transcription factor SOX-5;Transcription factor SOX-6	SOX5;SOX6	1.74483	2.47417	1	1	22	22	54933	3154	6280300	3	anatomical structure development;anatomical structure morphogenesis;astrocyte differentiation;biological regulation;biosynthetic process;cardiac cell differentiation;cardiac muscle cell differentiation;cartilage development;cell development;cell differentiation;cell fate commitment;cell fate specification;cell morphogenesis;cellular biosynthetic process;cellular component morphogenesis;cellular c…	binding;DNA binding;nucleic acid binding;nucleic acid binding transcription factor activity;regulatory region DNA binding;regulatory region nucleic acid binding;sequence-specific DNA binding;sequence-specific DNA binding RNA polymerase II transcription factor activity;sequence-specific DNA binding transcription factor activity;transcription regulatory region DNA binding	cell part;intracellular membrane-bounded organelle;intracellular organelle;intracellular organelle part;intracellular part;membrane-bounded organelle;nuclear part;nucleoplasm;nucleus;organelle;organelle part	18.6831	19.3648	19.2848	19.9084	20.7888	20.5313	21.802	21.0983
Q17RS7;Q8N1H6	Flap endonuclease GEN homolog 1	GEN1	1.74156	1.47874	2	2	35	35	10288	62188	4765000	4	biological regulation;cell cycle process;cellular macromolecule metabolic process;cellular metabolic process;cellular nitrogen compound metabolic process;cellular process;cellular response to stimulus;cellular response to stress;chromosome separation;DNA metabolic process;DNA recombination;DNA repair;double-strand break repair;double-strand break repair via homologous recombination;macromolecule …	binding;catalytic activity;cation binding;crossover junction endodeoxyribonuclease activity;deoxyribonuclease activity;DNA binding;endodeoxyribonuclease activity;endodeoxyribonuclease activity, producing 3'-phosphomonoesters;endonuclease activity;endonuclease activity, active with either ribo- or deoxyribonucleic acids and producing 3'-phosphomonoesters;hydrolase activity;hydrolase activity, acti…	cell part;centrosome;cytoplasmic part;cytoskeletal part;extracellular membrane-bounded organelle;extracellular organelle;extracellular region part;extracellular vesicular exosome;intracellular membrane-bounded organelle;intracellular non-membrane-bounded organelle;intracellular organelle;intracellular organelle part;intracellular part;membrane-bounded organelle;membrane-bounded vesicle;microtubul…	19.7496	20.0742	20.3097	20.2068	20.0335	22.6876	22.6371	21.9485
B7Z8S4;A0A024RAA0;Q969V5;B4DE24	Mitochondrial ubiquitin ligase activator of NFKB 1	C1orf166;MUL1	1.74046	2.20284	4	4	222	222	28899	14689	48278000	10	activation of caspase activity;activation of JUN kinase activity;activation of MAPK activity;biological regulation;cellular component organization;cellular component organization at cellular level;cellular component organization or biogenesis;cellular component organization or biogenesis at cellular level;cellular localization;cellular macromolecule metabolic process;cellular metabolic process;ce…	acid-amino acid ligase activity;binding;catalytic activity;cation binding;enzyme binding;identical protein binding;ion binding;ligase activity;ligase activity, forming carbon-nitrogen bonds;metal ion binding;molecular transducer activity;protein binding;signal transducer activity;small conjugating protein ligase activity;SUMO ligase activity;transition metal ion binding;ubiquitin protein ligase b…	axon;cell body;cell part;cell projection;cytoplasm;cytoplasmic part;integral to membrane;integral to mitochondrial membrane;integral to mitochondrial outer membrane;integral to organelle membrane;intracellular membrane-bounded organelle;intracellular organelle;intracellular organelle part;intracellular part;intrinsic to membrane;intrinsic to mitochondrial outer membrane;intrinsic to organelle mem…	21.0315	22.2036	21.8612	22.3299	24.298	23.1184	23.9211	23.0506
A0A087WX59;Q16186;Q68E00	Proteasomal ubiquitin receptor ADRM1	ADRM1;DKFZp686G2045	1.73441	1.93734	3	3	117	117	37504	3356	834610000	13	biological regulation;biosynthetic process;cellular biosynthetic process;cellular component assembly;cellular component assembly at cellular level;cellular component organization;cellular component organization at cellular level;cellular component organization or biogenesis;cellular component organization or biogenesis at cellular level;cellular macromolecular complex assembly;cellular macromolec…	binding;endopeptidase activator activity;endopeptidase regulator activity;enzyme activator activity;enzyme binding;enzyme regulator activity;peptidase activator activity;peptidase regulator activity;protease binding;proteasome binding;protein binding;protein complex binding	cell part;cytoplasm;integral to membrane;integral to plasma membrane;intracellular membrane-bounded organelle;intracellular organelle;intracellular organelle part;intracellular part;intrinsic to membrane;intrinsic to plasma membrane;macromolecular complex;membrane;membrane part;membrane-bounded organelle;nuclear part;nucleoplasm;nucleus;organelle;organelle part;plasma membrane;plasma membrane par…	26.0019	26.4857	26.5519	26.7798	27.0101	27.9626	29.0583	28.726
O96008;K7EKG4	Mitochondrial import receptor subunit TOM40 homolog	TOMM40	1.73032	0.533158	5	5	194	194	37893	37795	92256000	13	cellular macromolecule metabolic process;cellular metabolic process;cellular process;cellular protein metabolic process;establishment of localization;establishment of localization in cell;establishment of protein localization;establishment of protein localization in mitochondrion;establishment of protein localization to organelle;intracellular protein transport;intracellular transport;ion transpo…	channel activity;macromolecule transmembrane transporter activity;passive transmembrane transporter activity;porin activity;protein transmembrane transporter activity;protein transporter activity;substrate-specific transmembrane transporter activity;substrate-specific transporter activity;transmembrane transporter activity;transporter activity;wide pore channel activity	cell part;cytoplasm;cytoplasmic part;extracellular membrane-bounded organelle;extracellular organelle;extracellular region part;extracellular vesicular exosome;integral to membrane;integral to mitochondrial membrane;integral to mitochondrial outer membrane;integral to organelle membrane;intracellular membrane-bounded organelle;intracellular organelle;intracellular organelle part;intracellular par…	21.8475	21.6803	20.0563	21.4715	21.5181	22.2463	20.9577	27.2547
Q6XYC5;J3KPT4;Q9H4I3;A0A024R500	TraB domain-containing protein	TRABD;RP3-402G11.12	1.72712	1.24926	4	4	195	195	33181	28555	128600000	22				24.8365	24.0772	22.8063	22.677	25.9026	24.2444	24.6959	26.4627
B7WP89;Q0P651	Uncharacterized protein C4orf29	C4orf29	1.70802	3.78597	3	3	86	86	43353	88505	21882000	6			extracellular region	21.5253	20.8047	21.1239	20.7899	22.462	22.8341	22.7914	22.9883
A0A0A0MRW1;A0A0A0MRV9;Q5T586;A0A0A0MRW2;Q5T593;A0A0A0MRW0;A0A0A0MRW3;Q8IW50	Protein FAM219A	FAM219A	1.69534	1.11761	1	1	83	83	17234	34587	10693000	3				21.9423	20.9405	19.4438	19.5249	20.6123	22.5796	22.7681	22.6729
Q8IX90	Spindle and kinetochore-associated protein 3	SKA3	1.69019	1.34406	8	8	311	311	46359	70067	173730000	31	biological regulation;cell cycle phase;cell cycle process;cell division;cellular component organization;cellular component organization at cellular level;cellular component organization or biogenesis;cellular component organization or biogenesis at cellular level;cellular process;chromosome segregation;mitosis;nuclear division;organelle fission;organelle organization;regulation of biological proc…		cell part;chromosomal part;condensed chromosome outer kinetochore;cytoplasm;cytoskeletal part;intracellular organelle part;intracellular part;macromolecular complex;microtubule;organelle part;protein complex;spindle microtubule	24.6002	23.6966	23.5751	23.7886	25.1291	24.6335	25.2046	27.454
A0A024RCZ8;Q9NSK0;C9J8T5	Kinesin light chain 4	KLC4	1.6866	2.89848	8	8	16	16	68639	23103	89105000	19	axon cargo transport;cellular component movement;cellular process;cytoskeleton-dependent intracellular transport;establishment of localization;establishment of localization in cell;intracellular transport;microtubule-based movement;microtubule-based process;microtubule-based transport;transport	catalytic activity;hydrolase activity;hydrolase activity, acting on acid anhydrides;hydrolase activity, acting on acid anhydrides, in phosphorus-containing anhydrides;microtubule motor activity;motor activity;nucleoside-triphosphatase activity;pyrophosphatase activity	cell part;cell projection;cell projection part;ciliary rootlet;cilium;cilium part;cytoplasm;cytoskeletal part;intracellular organelle part;intracellular part;kinesin complex;macromolecular complex;microtubule;microtubule associated complex;motile cilium;neuron projection;organelle part;protein complex	22.9852	22.8944	23.6638	23.4804	24.3187	24.8794	25.2562	25.3159
P62875	DNA-directed RNA polymerases I, II, and III subunit RPABC5	POLR2L	1.68448	0.64719	1	1	134	134	7645	26252	38420000	4	biological regulation;biosynthetic process;cellular biosynthetic process;cellular macromolecule biosynthetic process;cellular macromolecule metabolic process;cellular metabolic process;cellular nitrogen compound metabolic process;cellular process;cellular response to stimulus;cellular response to stress;defense response;developmental process;DNA metabolic process;DNA repair;gene expression;immune…	binding;catalytic activity;cation binding;DNA binding;DNA-directed RNA polymerase activity;ion binding;metal ion binding;nucleic acid binding;nucleotidyltransferase activity;RNA polymerase activity;transferase activity;transferase activity, transferring phosphorus-containing groups;transition metal ion binding;zinc ion binding	cell part;cytoplasmic part;cytosol;DNA-directed RNA polymerase complex;DNA-directed RNA polymerase I complex;DNA-directed RNA polymerase II, core complex;DNA-directed RNA polymerase III complex;intracellular membrane-bounded organelle;intracellular organelle;intracellular organelle part;intracellular part;macromolecular complex;membrane-bounded organelle;nuclear DNA-directed RNA polymerase comple…	23.1655	22.3666	22.105	18.7592	23.0021	22.2331	22.3349	25.5642
H9ZYJ2;P10599	Thioredoxin	TXN	1.68321	1.93999	4	4	276	276	11737	14805	340600000	16	activation of protein kinase activity;activation of protein kinase B activity;biological regulation;biosynthetic process;cell communication;cell proliferation;cell redox homeostasis;cell-cell signaling;cellular biosynthetic process;cellular component movement;cellular homeostasis;cellular macromolecule metabolic process;cellular metabolic process;cellular nitrogen compound metabolic process;cellu…	catalytic activity;disulfide oxidoreductase activity;oxidoreductase activity;oxidoreductase activity, acting on a sulfur group of donors;oxidoreductase activity, acting on a sulfur group of donors, disulfide as acceptor;peptide disulfide oxidoreductase activity;protein disulfide oxidoreductase activity	cell part;cytoplasm;cytoplasmic part;cytosol;extracellular membrane-bounded organelle;extracellular organelle;extracellular region part;extracellular vesicular exosome;intracellular membrane-bounded organelle;intracellular organelle;intracellular organelle part;intracellular part;membrane-bounded organelle;membrane-bounded vesicle;mitochondrion;nuclear part;nucleoplasm;nucleus;organelle;organelle…	25.4501	24.2788	24.0402	25.6165	26.0842	27.211	26.3242	26.499
Q13242;S4R3G0;B4DFT9;A8K3M9;H0YIB4	Serine/arginine-rich splicing factor 9	SRSF9	1.683	1.54105	5	5	276	276	25542	99285	59057000	11	biological regulation;biosynthetic process;cellular biosynthetic process;cellular component assembly;cellular component assembly at cellular level;cellular component organization;cellular component organization at cellular level;cellular component organization or biogenesis;cellular component organization or biogenesis at cellular level;cellular macromolecular complex assembly;cellular macromolec…	binding;nucleic acid binding;nucleotide binding	cell part;intracellular non-membrane-bounded organelle;intracellular organelle;intracellular organelle part;intracellular part;non-membrane-bounded organelle;nuclear part;nucleolus;nucleoplasm;organelle;organelle part	23.3907	22.6997	21.6486	22.1002	23.2126	23.7174	24.3326	25.3087
A0A024R629;P16150	Leukosialin	SPN	1.67622	2.83678	3	3	14	14	40321	39715	23815000	7	biological regulation;blood coagulation;cell migration;cell motility;cell surface receptor linked signaling pathway;cellular component movement;cellular defense response;cellular process;cellular response to stimulus;chemotaxis;coagulation;defense response;defense response to bacterium;establishment or maintenance of cell polarity;hemostasis;immune response;immune system process;leukocyte migrati…	molecular transducer activity;receptor activity;signal transducer activity;signaling receptor activity;transmembrane signaling receptor activity	basement membrane;cell part;cell projection;cell surface;external side of plasma membrane;extracellular matrix part;extracellular membrane-bounded organelle;extracellular organelle;extracellular region part;extracellular space;extracellular vesicular exosome;integral to membrane;integral to plasma membrane;intrinsic to membrane;intrinsic to plasma membrane;membrane;membrane part;membrane-bounded …	21.1367	21.5218	21.2797	21.8035	22.9469	23.6156	23.4433	22.4408
E9PPF9;E9PLD2;B2RAQ5;A0A0S2Z5H6;B4DRE5;Q9H019;E9PNJ0;E9PPQ0;E9PRW1;E9PSD6;C9JF50;E9PLU1;E9PRK5;B3KPT5	Mitochondrial fission regulator 1-like	MTFR1L	1.66929	1.13538	2	2	15	15	17141	57484	12604000	6			cell part;cytoplasm;intracellular part	22.6856	20.4594	20.1055	20.1909	21.2757	22.4012	23.3892	23.0525
P50402;Q5HY57	Emerin	EMD	1.6609	2.42535	3	3	138	138	28994	13232	75012000	15	anatomical structure development;biological regulation;cell cycle;cell cycle process;cell differentiation;cellular component disassembly;cellular component disassembly at cellular level;cellular component organization;cellular component organization at cellular level;cellular component organization or biogenesis;cellular component organization or biogenesis at cellular level;cellular developmenta…	actin binding;beta-tubulin binding;binding;cytoskeletal protein binding;protein binding;tubulin binding	cell part;cytoplasmic part;cytoskeletal part;endoplasmic reticulum;envelope;integral to membrane;intracellular membrane-bounded organelle;intracellular organelle;intracellular organelle part;intracellular part;intrinsic to membrane;macromolecular complex;membrane;membrane part;membrane-bounded organelle;microtubule;nuclear envelope;nuclear inner membrane;nuclear membrane;nuclear outer membrane;nu…	22.7372	22.8591	23.0776	23.3715	23.7211	24.6931	25.0862	25.1886
P04921	Glycophorin-C	GYPC	1.65474	1.15543	1	1	203	203	1381	56651	10344000	3			cell cortex part;cell part;cortical cytoskeleton;cytoplasmic part;cytoskeleton;integral to membrane;integral to plasma membrane;intracellular non-membrane-bounded organelle;intracellular organelle;intracellular part;intrinsic to membrane;intrinsic to plasma membrane;membrane;membrane part;non-membrane-bounded organelle;organelle;plasma membrane;plasma membrane part	18.843	21.861	21.6618	20.4078	21.9458	22.3137	23.1632	21.9699
O95801	Tetratricopeptide repeat protein 4	TTC4	1.65002	2.87151	8	8	23	23	44678	18116	224270000	17				24.4255	24.6898	25.2072	24.2816	25.7458	26.3077	26.383	26.7677
Q5SZR4;B3KPI5;B4DZR8;F6TB26;Q9Y2W6;E9PKN8;B7ZAG4;B4DJ68	Tudor and KH domain-containing protein	TDRKH	1.6435	1.8643	2	2	41	41	6152	80375	25576000	8	biological regulation;cell cycle phase;cell cycle process;cell differentiation;cellular developmental process;cellular macromolecule metabolic process;cellular metabolic process;cellular nitrogen compound metabolic process;cellular process;cellular process involved in reproduction;developmental process;DNA alkylation;DNA metabolic process;DNA methylation;DNA methylation involved in gamete generat…	binding;nucleic acid binding;RNA binding	cell part;cytoplasmic part;intracellular membrane-bounded organelle;intracellular non-membrane-bounded organelle;intracellular organelle;intracellular part;macromolecular complex;membrane-bounded organelle;mitochondrion;non-membrane-bounded organelle;organelle;P granule;pi-body;piP-body;ribonucleoprotein complex;RNA granule	20.8525	21.3331	20.8441	21.7495	23.206	23.5024	23.0474	21.5975
A8K1V4;Q15788;B5MCN7	Nuclear receptor coactivator 1	NCOA1	1.6367	2.34564	7	7	71	71	15235	1414	24634000	8	anatomical structure development;anatomical structure morphogenesis;androgen receptor signaling pathway;behavior;bile acid and bile salt transport;bile acid metabolic process;biological regulation;biosynthetic process;body fluid secretion;carbon catabolite activation of transcription;carbon catabolite activation of transcription from RNA polymerase II promoter;carbon catabolite regulation of tran…	acetyltransferase activity;androgen receptor binding;binding;catalytic activity;chromatin binding;DNA binding;enzyme binding;histone acetyltransferase activity;hormone receptor binding;ligand-dependent nuclear receptor binding;ligand-dependent nuclear receptor transcription coactivator activity;lysine N-acetyltransferase activity;molecular transducer activity;N-acetyltransferase activity;N-acyltr…	cell part;cell projection;chromatin;chromosomal part;cytoplasm;intracellular membrane-bounded organelle;intracellular organelle;intracellular organelle part;intracellular part;membrane-bounded organelle;neuron projection;nuclear chromatin;nuclear chromosome part;nuclear part;nucleoplasm;nucleus;organelle;organelle part	20.901	21.0259	21.3399	21.4033	23.5335	22.1485	23.2728	22.2621
D3DP46;P61009	Signal peptidase complex subunit 3	SPCS3	1.63576	0.945267	2	2	89	89	20312	37089	122110000	7	biological regulation;biosynthetic process;cellular biosynthetic process;cellular macromolecule biosynthetic process;cellular macromolecule metabolic process;cellular metabolic process;cellular process;cellular protein metabolic process;cotranslational protein targeting to membrane;establishment of localization;establishment of localization in cell;establishment of protein localization;establishm…	catalytic activity;hydrolase activity;peptidase activity	cell part;cytoplasmic part;endoplasmic reticulum;endoplasmic reticulum membrane;endoplasmic reticulum part;integral to membrane;intracellular membrane-bounded organelle;intracellular organelle;intracellular organelle part;intracellular part;intrinsic to membrane;macromolecular complex;membrane;membrane part;membrane-bounded organelle;organelle;organelle membrane;organelle part;protein complex;sig…	24.1876	24.4018	24.6591	21.0843	24.4174	25.2815	25.6196	25.5574
Q6NUN9;C9JNZ9	Zinc finger protein 746	ZNF746	1.63425	1.40405	2	2	65	65	69135	1329	19994000	5	biological regulation;negative regulation of biological process;negative regulation of biosynthetic process;negative regulation of cellular biosynthetic process;negative regulation of cellular macromolecule biosynthetic process;negative regulation of cellular metabolic process;negative regulation of cellular process;negative regulation of gene expression;negative regulation of macromolecule biosy…	binding;cation binding;core promoter proximal region DNA binding;core promoter proximal region sequence-specific DNA binding;DNA binding;enzyme binding;ion binding;metal ion binding;nucleic acid binding;nucleic acid binding transcription factor activity;protein binding;regulatory region DNA binding;regulatory region nucleic acid binding;RNA polymerase II core promoter proximal region sequence-spe…	cell part;cytoplasm;intracellular;intracellular membrane-bounded organelle;intracellular organelle;intracellular part;membrane-bounded organelle;nucleus;organelle	22.2229	21.6839	21.3185	20.7068	21.7375	23.0036	24.3168	23.4112
A0A142I7X2			1.63152	4.28874	1	1	15	15	86677	16875	8063100	3		binding;cation binding;ion binding;metal ion binding;transition metal ion binding;zinc ion binding		19.9589	20.3521	20.3945	20.4857	22.0471	21.6168	22.1086	21.9447
G9FP35;A0A024R240;P50148;B1AM21	Guanine nucleotide-binding protein G(q) subunit alpha	GNAQ	1.62938	0.761742	6	6	181	181	42111	14981	166310000	25	activation of adenylate cyclase activity;activation of adenylate cyclase activity by G-protein signaling pathway;activation of phospholipase C activity;activation of phospholipase C activity by dopamine receptor signaling pathway;activation of phospholipase C activity by G-protein coupled receptor protein signaling pathway coupled to IP3 second messenger;anatomical structure development;anatomica…	binding;catalytic activity;cation binding;enzyme activator activity;enzyme regulator activity;G-protein beta/gamma-subunit complex binding;G-protein-coupled receptor binding;GTP binding;GTPase activator activity;GTPase activity;GTPase regulator activity;guanyl nucleotide binding;guanyl ribonucleotide binding;hydrolase activity;hydrolase activity, acting on acid anhydrides;hydrolase activity, acti…	cell part;cytoplasm;cytoplasmic part;extracellular membrane-bounded organelle;extracellular organelle;extracellular region part;extracellular vesicular exosome;extrinsic to internal side of plasma membrane;extrinsic to membrane;extrinsic to plasma membrane;heterotrimeric G-protein complex;intracellular organelle part;intracellular part;lysosomal membrane;macromolecular complex;membrane;membrane p…	23.7905	22.6859	22.9939	23.1246	24.1312	23.37	23.7849	27.8264
Q8N1G1;Q05DB0	RNA exonuclease 1 homolog	REXO1	1.62831	1.61338	2	2	21	21	13151	15881	3827400	2		binding;catalytic activity;exonuclease activity;hydrolase activity;hydrolase activity, acting on ester bonds;nuclease activity;nucleic acid binding	cell part;intracellular organelle part;intracellular part;nuclear part;nucleoplasm;organelle part	19.7106	19.9179	20.1874	19.7903	20.0315	21.9938	22.5137	21.5805
E5RGS9;Q9NRG0	Chromatin accessibility complex protein 1	CHRAC1	1.6249	1.85595	3	3	304	304	62643	39864	19504000	11	biosynthetic process;cellular biosynthetic process;cellular component organization;cellular component organization at cellular level;cellular component organization or biogenesis;cellular component organization or biogenesis at cellular level;cellular macromolecule biosynthetic process;cellular macromolecule metabolic process;cellular metabolic process;cellular nitrogen compound metabolic process…	binding;catalytic activity;DNA binding;DNA polymerase activity;DNA-directed DNA polymerase activity;nucleic acid binding;nucleotidyltransferase activity;sequence-specific DNA binding;transferase activity;transferase activity, transferring phosphorus-containing groups	cell part;chromatin accessibility complex;chromatin remodeling complex;chromosomal part;DNA polymerase complex;epsilon DNA polymerase complex;intracellular;intracellular organelle part;intracellular part;macromolecular complex;nuclear chromosome part;nuclear part;organelle part;protein complex	20.6393	20.6811	21.5759	21.2758	21.5464	22.5383	23.2853	23.3017
Q969P0;C9J8Z4;Q8NF83	Immunoglobulin superfamily member 8	IGSF8;FLJ00271	1.62385	3.90726	8	8	157	157	65033	19509	74072000	16	anatomical structure development;biological regulation;cell proliferation;cellular component movement;cellular process;developmental process;fertilization;muscle tissue development;nervous system development;regulation of biological process;regulation of cell motility;regulation of cellular component movement;regulation of cellular process;regulation of localization;regulation of locomotion;repro…		axon;cell part;cell projection;extracellular membrane-bounded organelle;extracellular organelle;extracellular region part;extracellular vesicular exosome;integral to membrane;intrinsic to membrane;membrane;membrane part;membrane-bounded organelle;membrane-bounded vesicle;neuron projection;organelle;plasma membrane;synapse;vesicle	23.2561	23.2083	22.68	22.9424	24.3777	24.5909	24.9995	24.6141
I3L072;B7Z7E5;A0A024R8P4;Q9BSJ5;J3KT60;J3KTJ7	Uncharacterized protein C17orf80	C17orf80	1.61738	1.19762	3	3	68	68	60833	64061	25258000	4			cell part;extracellular membrane-bounded organelle;extracellular organelle;extracellular region part;extracellular vesicular exosome;integral to membrane;intrinsic to membrane;membrane part;membrane-bounded organelle;membrane-bounded vesicle;organelle;vesicle	20.7223	22.0873	21.3996	22.5552	23.6599	22.5308	22.2309	24.8123
A0A024RBB9;Q9Y2U8	Inner nuclear membrane protein Man1	LEMD3	1.61736	1.81994	18	18	291	291	99996	24069	364900000	66	biological regulation;blood vessel endothelial cell migration;blood vessel endothelial cell migration involved in intussusceptive angiogenesis;cell differentiation;cell migration;cell motility;cellular component movement;cellular component organization;cellular component organization at cellular level;cellular component organization or biogenesis;cellular component organization or biogenesis at c…	binding;DNA binding;nucleic acid binding;nucleotide binding	cell part;integral to membrane;integral to nuclear inner membrane;integral to organelle membrane;intracellular organelle part;intracellular part;intrinsic to membrane;intrinsic to nuclear inner membrane;intrinsic to organelle membrane;membrane;membrane part;nuclear inner membrane;nuclear membrane;nuclear membrane part;nuclear part;organelle inner membrane;organelle membrane;organelle part	25.7297	25.5455	24.9366	23.8047	27.2344	26.3466	26.4269	26.4779
Q5T8U5;Q5T8U7;O15260;B7Z605;B7Z8F3;B7Z7A8	Surfeit locus protein 4	SURF4	1.61661	1.37219	3	3	194	194	21127	44565	162840000	16	biological regulation;cellular component organization;cellular component organization at cellular level;cellular component organization or biogenesis;cellular component organization or biogenesis at cellular level;cellular process;Golgi organization;organelle organization;positive regulation of biological process;positive regulation of cellular component organization;positive regulation of cellul…		cell part;cytoplasmic part;endoplasmic reticulum membrane;endoplasmic reticulum part;endoplasmic reticulum-Golgi intermediate compartment;endoplasmic reticulum-Golgi intermediate compartment membrane;Golgi apparatus part;Golgi membrane;integral to membrane;intracellular membrane-bounded organelle;intracellular organelle;intracellular organelle part;intracellular part;intrinsic to membrane;membran…	25.1559	24.1914	22.2384	23.2212	25.4434	25.2208	25.2657	25.3433
B7Z4B1;A0A024QZ33;B7ZL27;B2R9Y2;Q9H0G5	Nuclear speckle splicing regulatory protein 1	CCDC55;NSRP1	1.61527	0.990243	3	3	69	69	58838	49069	5551700	5	biological regulation;cellular macromolecule metabolic process;cellular metabolic process;cellular nitrogen compound metabolic process;cellular process;developmental process;establishment of localization;establishment of localization in cell;intracellular transport;macromolecule metabolic process;metabolic process;mRNA metabolic process;mRNA processing;nitrogen compound metabolic process;nuclear …	binding;mRNA binding;nucleic acid binding;RNA binding	cell part;intracellular membrane-bounded organelle;intracellular organelle;intracellular organelle part;intracellular part;macromolecular complex;membrane-bounded organelle;nuclear body;nuclear part;nuclear speck;nucleoplasm part;nucleus;organelle;organelle part;ribonucleoprotein complex	19.737	21.5268	20.3052	18.8982	20.38	22.1492	23.2812	21.1179
Q5JQ44;P61225	Ras-related protein Rap-2b	DKFZp547A0616;RAP2B	1.61454	2.0731	2	1	149	88	20294	69481	19119000	2	biological adhesion;biological regulation;cell activation;cell adhesion;cell-cell adhesion;cellular process;cellular response to stimulus;homotypic cell-cell adhesion;intracellular signal transduction;negative regulation of biological process;negative regulation of cell migration;negative regulation of cell motility;negative regulation of cellular component movement;negative regulation of cellula…	binding;GDP binding;GTP binding;guanyl nucleotide binding;guanyl ribonucleotide binding;nucleotide binding;purine nucleotide binding;purine ribonucleoside triphosphate binding;purine ribonucleotide binding;ribonucleotide binding	cell junction;cell part;cell-cell contact zone;cell-cell junction;cytoplasmic part;cytosol;endosomal part;endosome membrane;extracellular membrane-bounded organelle;extracellular organelle;extracellular region part;extracellular vesicular exosome;intracellular organelle part;intracellular part;membrane;membrane part;membrane raft;membrane-bounded organelle;membrane-bounded vesicle;occluding junct…	20.3208	20.9239	21.0893	21.0355	22.7108	22.2585	23.3312	21.5273
A0A0S2Z3L2;P16615;H7C5W9	Sarcoplasmic/endoplasmic reticulum calcium ATPase 2	ATP2A2	1.60717	4.46139	27	18	296	213	11476	20711	2920100000	194	anatomical structure development;apoptosis;apoptosis in response to endoplasmic reticulum stress;apoptotic mitochondrial changes;biological adhesion;biological regulation;blood coagulation;calcium ion homeostasis;calcium ion import;calcium ion transmembrane transport;calcium ion transport;calcium-mediated signaling;cation homeostasis;cation transport;cell adhesion;cell death;cellular calcium ion …	active transmembrane transporter activity;adenyl nucleotide binding;adenyl ribonucleotide binding;ATP binding;ATPase activity;ATPase activity, coupled;ATPase activity, coupled to movement of substances;ATPase activity, coupled to transmembrane movement of ions;ATPase activity, coupled to transmembrane movement of ions, phosphorylative mechanism;ATPase activity, coupled to transmembrane movement o…	calcium channel complex;cation channel complex;cell part;contractile fiber part;cytoplasmic part;endoplasmic reticulum;endoplasmic reticulum membrane;endoplasmic reticulum part;endoplasmic reticulum-Golgi intermediate compartment;H zone;I band;integral to membrane;integral to plasma membrane;intracellular membrane-bounded organelle;intracellular organelle;intracellular organelle part;intracellula…	28.1907	28.2665	27.8796	28.2568	30.082	29.7532	29.5859	29.6014
F5H5N1;B7Z1U1;A8K0V6;Q8NAS7;Q7LD69;F5GXJ1;O75251;B7Z4P1;Q6ZQU6;Q9H3K5;A0A087WXF6;A0A087WTI3	NADH dehydrogenase [ubiquinone] iron-sulfur protein 7, mitochondrial	NDUFS7	1.60662	1.04135	2	2	126	126	1977	43852	154310000	14	cellular component assembly;cellular component assembly at cellular level;cellular component biogenesis;cellular component organization;cellular component organization at cellular level;cellular component organization or biogenesis;cellular component organization or biogenesis at cellular level;cellular macromolecular complex assembly;cellular macromolecular complex subunit organization;cellular …	4 iron, 4 sulfur cluster binding;binding;catalytic activity;cation binding;cofactor binding;ion binding;iron-sulfur cluster binding;metal cluster binding;metal ion binding;NADH dehydrogenase (quinone) activity;NADH dehydrogenase (ubiquinone) activity;NADH dehydrogenase activity;oxidoreductase activity;oxidoreductase activity, acting on NADH or NADPH;oxidoreductase activity, acting on NADH or NADP…	cell body;cell part;cell projection;cytoplasmic part;intracellular organelle part;intracellular part;macromolecular complex;membrane;membrane part;mitochondrial inner membrane;mitochondrial membrane;mitochondrial membrane part;mitochondrial part;mitochondrial respiratory chain complex I;NADH dehydrogenase complex;neuron projection;neuronal cell body;organelle inner membrane;organelle membrane;org…	25.0656	22.1928	24.6677	23.8847	24.8669	25.1179	25.2649	26.9876
Q9UNR6;Q5HYI4;Q14534;B4DHX0;E7EVQ6;B4DX34	Squalene monooxygenase	ERG1;DKFZp686B0215;SQLE	1.60519	3.88967	3	3	8	8	63922	71636	18133000	7	alcohol metabolic process;biosynthetic process;cellular aromatic compound metabolic process;cellular metabolic process;cellular process;cholesterol biosynthetic process;cholesterol metabolic process;lipid biosynthetic process;lipid metabolic process;metabolic process;primary metabolic process;response to chemical stimulus;response to organic substance;response to stimulus;small molecule metabolic…	binding;catalytic activity;coenzyme binding;cofactor binding;flavin adenine dinucleotide binding;monooxygenase activity;oxidoreductase activity;oxidoreductase activity, acting on paired donors, with incorporation or reduction of molecular oxygen;squalene monooxygenase activity	cell part;cytoplasmic part;endoplasmic reticulum membrane;endoplasmic reticulum part;integral to membrane;intracellular membrane-bounded organelle;intracellular organelle;intracellular organelle part;intracellular part;intrinsic to membrane;membrane;membrane part;membrane-bounded organelle;organelle;organelle membrane;organelle part	21.0416	21.0005	20.696	21.3434	22.2644	22.8231	22.7995	22.6152
A0A0A0PND4;A0A0A0PUW4;A0A0A0PWB3;A0A0A0PQM4;A0A0A0PQC8;A0A0A0PVC5;A0A0A0PQ79;A0A0A0PSC0;A0A0A0PVA5;A0A0A0PMH4;A0A0A0PMP8;A0A0N6YPC3;H9M4C5;A0A1L1ZDQ5;Q53ZV6;H9A7H1;D7P652;D7P639;D7P626;B8X5X6;B2XIN1;A0A1L1ZH79;A0A1J0Q3H4;A0A1J0PPE5;A0A023REG7;A0A023QG09;X5CNW6;X5CM76;X5CKG0;X5CI32;X5CF88;X5CBQ3;X5BYA7;X5BWL7;X5BWF0;X5BVZ3;X5BVA2;X5BV52;X5BPC3;X2JJ49;X2CH62;W8DRA6;W8DIL7;W8DCA6;W8DBU7;W8DBM7;W8DAS…	NADH-ubiquinone oxidoreductase chain 5	ND5;NADH5;nd5;ndh5;MT-ND5	1.60509	2.09646	2	2	41	41	41047	2283	47070000	6	ATP synthesis coupled electron transport;cellular metabolic process;cellular process;electron transport chain;generation of precursor metabolites and energy;metabolic process;mitochondrial electron transport, NADH to ubiquinone;oxidation-reduction process;respiratory electron transport chain;small molecule metabolic process	catalytic activity;NADH dehydrogenase (quinone) activity;NADH dehydrogenase (ubiquinone) activity;NADH dehydrogenase activity;oxidoreductase activity;oxidoreductase activity, acting on NADH or NADPH;oxidoreductase activity, acting on NADH or NADPH, quinone or similar compound as acceptor	cell part;cytoplasmic part;integral to membrane;intracellular membrane-bounded organelle;intracellular organelle;intracellular organelle part;intracellular part;intrinsic to membrane;macromolecular complex;membrane;membrane part;membrane-bounded organelle;mitochondrial inner membrane;mitochondrial membrane;mitochondrial membrane part;mitochondrial part;mitochondrial respiratory chain complex I;mi…	21.5837	22.2678	22.2458	22.375	23.8463	24.604	23.6394	22.8029
A0N4Z5;A0A075B6U8;A0N7E3;A2NZL4		Tcr-alpha;TRAJ12;V<alpha>1;TCR	1.60094	1.95594	1	1	421	421	21405	18171	23214000	4				20.9879	21.1119	20.8676	21.0479	23.1795	23.3435	22.4833	21.4128
Q9BZL4;B4DLW4;K7EL81;A0A024R4S2	Protein phosphatase 1 regulatory subunit 12C	PPP1R12C	1.60035	2.08714	5	5	92	92	8488	12497	8258300	11			cell part;cytoplasm;intracellular part	19.8326	19.9046	19.9727	20.0734	20.5131	21.2796	22.315	22.077
Q9Y6X8	Zinc fingers and homeoboxes protein 2	ZHX2	1.59474	1.61021	6	5	91	8	92306	12787	22845000	10	biological regulation;biosynthetic process;catabolic process;cellular biosynthetic process;cellular catabolic process;cellular macromolecule biosynthetic process;cellular macromolecule catabolic process;cellular macromolecule metabolic process;cellular metabolic process;cellular nitrogen compound metabolic process;cellular process;developmental process;macromolecule biosynthetic process;macromole…	binding;cation binding;DNA binding;identical protein binding;ion binding;metal ion binding;nucleic acid binding;nucleic acid binding transcription factor activity;protein binding;protein binding transcription factor activity;protein dimerization activity;protein heterodimerization activity;protein homodimerization activity;sequence-specific DNA binding transcription factor activity;transcription …	cell part;cytoplasm;intracellular membrane-bounded organelle;intracellular organelle;intracellular organelle part;intracellular part;membrane;membrane-bounded organelle;nuclear part;nucleoplasm;nucleus;organelle;organelle part;plasma membrane	21.6737	21.1586	20.2476	20.7645	23.3616	21.3064	22.8915	22.6638
Q2T9J0	Peroxisomal leader peptide-processing protease;Peroxisomal leader peptide-processing protease, 15 kDa form;Peroxisomal leader peptide-processing protease, 45 kDa form	TYSND1	1.5946	2.63663	4	4	118	118	59308	22575	40837000	5	biological regulation;cellular component assembly;cellular component organization;cellular component organization or biogenesis;macromolecular complex assembly;macromolecular complex subunit organization;macromolecule metabolic process;metabolic process;primary metabolic process;protein complex assembly;protein complex subunit organization;protein homooligomerization;protein maturation;protein me…	binding;catalytic activity;endopeptidase activity;enzyme binding;hydrolase activity;identical protein binding;peptidase activity;peptidase activity, acting on L-amino acid peptides;protease binding;protein binding;serine hydrolase activity;serine-type endopeptidase activity;serine-type peptidase activity	cell part;cytoplasmic part;intracellular membrane-bounded organelle;intracellular organelle;intracellular part;membrane;membrane-bounded organelle;microbody;organelle;peroxisome	21.3837	21.4422	22.2859	22.5209	23.1674	23.7317	23.6287	23.4835
C9JDI8;C9JYP5;E7ETP9;B4DZF5;B2R7Z2;Q9UQV4	Lysosome-associated membrane glycoprotein 3	LAMP3	1.59265	0.559839	2	2	231	231	14996	39939	10230000	4	cell proliferation;immune system process		cell part;cytoplasmic part;integral to membrane;intracellular organelle part;intracellular part;intrinsic to membrane;lysosomal membrane;membrane;membrane part;organelle membrane;organelle part;vacuolar membrane;vacuolar part	23.5186	21.3771	18.426	18.4164	21.1158	21.3255	22.9398	22.7277
A0A024RBY9;P53701;Q68D50	Cytochrome c-type heme lyase	HCCS;DKFZp779I1858	1.59233	2.71749	6	6	168	168	30601	17884	92176000	21	anatomical structure morphogenesis;developmental process;metabolic process;organ morphogenesis;oxidation-reduction process	binding;carbon-sulfur lyase activity;catalytic activity;cation binding;holocytochrome-c synthase activity;ion binding;lyase activity;metal ion binding	cell part;cytoplasmic part;intracellular membrane-bounded organelle;intracellular organelle;intracellular organelle part;intracellular part;membrane;membrane-bounded organelle;mitochondrial inner membrane;mitochondrial membrane;mitochondrial part;mitochondrion;organelle;organelle inner membrane;organelle membrane;organelle part	22.8026	23.456	23.2597	23.2287	24.1236	24.6539	25.4204	24.9184
F8WF48;A0JLN5;R9WWI7;Q99442;F8WCJ7;Q3KR08;D3DNQ1	Translocation protein SEC62	SEC62;TLOC1	1.58613	2.39797	5	5	459	459	98703	25774	350610000	11	biological regulation;cellular macromolecule metabolic process;cellular metabolic process;cellular process;cellular protein metabolic process;cellular response to chemical stimulus;cellular response to organic substance;cellular response to stimulus;cellular response to stress;cellular response to topologically incorrect protein;cellular response to unfolded protein;cotranslational protein target…	protein transporter activity;receptor activity;substrate-specific transporter activity;transporter activity	aggresome;cell part;cytoplasmic part;cytoskeleton;cytosol;endoplasmic reticulum;endoplasmic reticulum membrane;endoplasmic reticulum part;inclusion body;integral to membrane;intermediate filament cytoskeleton;intracellular membrane-bounded organelle;intracellular non-membrane-bounded organelle;intracellular organelle;intracellular organelle part;intracellular part;intrinsic to membrane;membrane;m…	24.9073	25.2709	25.1535	25.7111	25.9647	27.0262	27.3962	27.0001
A8K6Q9;A0A024RDV9;Q8N0X7;B4DXT5;B3KML8;B3KMI3	Spartin	SPG20	1.58354	1.78981	5	5	107	107	72831	15327	47494000	11	abscission;adipose tissue development;anatomical structure development;biological regulation;cell division;cellular chemical homeostasis;cellular component organization;cellular component organization at cellular level;cellular component organization or biogenesis;cellular component organization or biogenesis at cellular level;cellular homeostasis;cellular ion homeostasis;cellular process;chemica…	binding;enzyme binding;protein binding;ubiquitin protein ligase binding	cell part;cytoplasm;cytoplasmic part;intracellular organelle part;intracellular part;lipid particle;membrane;midbody;mitochondrial membrane;mitochondrial outer membrane;mitochondrial part;organelle membrane;organelle outer membrane;organelle part;outer membrane;plasma membrane;synapse	22.2837	22.5606	21.721	20.9193	24.3554	23.3697	22.9401	23.1534
B7ZKW8;Q6JBY9	CapZ-interacting protein	RCSD1	1.57891	4.59701	13	13	523	523	41261	12666	340860000	59	cellular hyperosmotic response;cellular process;cellular response to abiotic stimulus;cellular response to osmotic stress;cellular response to stimulus;cellular response to stress;hyperosmotic response;multicellular organismal process;muscle contraction;muscle system process;response to abiotic stimulus;response to osmotic stress;response to stimulus;response to stress;skeletal muscle contraction…	actin binding;actin filament binding;binding;cytoskeletal protein binding;protein binding	actin filament;cell part;cytoskeletal part;intracellular organelle part;intracellular part;macromolecular complex;organelle part;protein complex	24.9441	25.1866	25.2074	25.364	26.6258	26.9357	26.5243	26.932
C9JU48;D3YTC9;Q6NXT1	Ankyrin repeat domain-containing protein 54	ANKRD54	1.5753	1.98546	1	1	56	56	22608	39644	19092000	7	biological regulation;establishment of localization;establishment of localization in cell;intracellular transport;nuclear transport;nucleocytoplasmic transport;positive regulation of biological process;positive regulation of cell differentiation;positive regulation of cellular process;positive regulation of developmental process;positive regulation of erythrocyte differentiation;positive regulati…	enzyme regulator activity;kinase regulator activity;protein kinase regulator activity	cell part;cytoplasm;intracellular membrane-bounded organelle;intracellular organelle;intracellular part;membrane-bounded organelle;midbody;nucleus;organelle	20.5419	21.2009	21.0884	21.6437	21.7527	22.4898	23.2616	23.272
E9PPV9;E9PI08;Q9Y256	CAAX prenyl protease 2	RCE1	1.57508	1.89256	1	1	88	88	10894	19518	50922000	7	CAAX-box protein processing;macromolecule metabolic process;metabolic process;primary metabolic process;protein maturation;protein metabolic process;protein processing;proteolysis	catalytic activity;cysteine-type endopeptidase activity;cysteine-type peptidase activity;endopeptidase activity;hydrolase activity;metalloendopeptidase activity;metallopeptidase activity;peptidase activity;peptidase activity, acting on L-amino acid peptides	cell part;cytoplasmic part;endoplasmic reticulum membrane;endoplasmic reticulum part;integral to membrane;integral to plasma membrane;intracellular organelle part;intracellular part;intrinsic to membrane;intrinsic to plasma membrane;membrane;membrane part;organelle membrane;organelle part;plasma membrane part	22.0454	22.8134	22.3894	22.9267	22.9471	24.3759	24.7756	24.3768
Q9P0K8	Forkhead box protein J2	FOXJ2	1.56564	2.60501	3	3	45	45	62394	46173	16505000	8	anatomical structure morphogenesis;biological regulation;cell differentiation;cellular developmental process;cellular process;developmental process;positive regulation of biological process;positive regulation of biosynthetic process;positive regulation of cellular biosynthetic process;positive regulation of cellular metabolic process;positive regulation of cellular process;positive regulation of…	binding;core promoter proximal region DNA binding;core promoter proximal region sequence-specific DNA binding;DNA binding;nucleic acid binding;nucleic acid binding transcription factor activity;regulatory region DNA binding;regulatory region nucleic acid binding;RNA polymerase II core promoter proximal region sequence-specific DNA binding;RNA polymerase II core promoter proximal region sequence-s…	cell part;intracellular membrane-bounded organelle;intracellular non-membrane-bounded organelle;intracellular organelle;intracellular organelle part;intracellular part;membrane-bounded organelle;non-membrane-bounded organelle;nuclear part;nucleolus;nucleus;organelle;organelle part	20.7167	20.8137	20.9169	21.3386	21.7107	22.5198	22.9039	22.9141
Q8NFV4;H7C396;C9J7Q4;H7BZ58;D3DXF2	Alpha/beta hydrolase domain-containing protein 11	ABHD11	1.56467	0.746288	2	2	54	54	3469	19308	8234200	1		catalytic activity;hydrolase activity	cell part;cytoplasmic part;intracellular membrane-bounded organelle;intracellular organelle;intracellular part;membrane-bounded organelle;mitochondrion;organelle	20.4748	20.9001	20.7857	20.2759	20.9991	21.177	21.292	25.227
Q14TF0;P48506;B4E2I4;E1CEI4;A0A0C4DGB2	Glutamate--cysteine ligase catalytic subunit	GCLC	1.56078	4.42663	13	12	235	224	72765	51757	312830000	37	amine biosynthetic process;amine metabolic process;apoptotic mitochondrial changes;biological regulation;biosynthetic process;carboxylic acid biosynthetic process;carboxylic acid metabolic process;cell redox homeostasis;cellular amine metabolic process;cellular amino acid biosynthetic process;cellular amino acid metabolic process;cellular biosynthetic process;cellular component organization;cellu…	acid-amino acid ligase activity;adenyl nucleotide binding;adenyl ribonucleotide binding;ADP binding;amine binding;amino acid binding;ATP binding;binding;carboxylic acid binding;catalytic activity;cation binding;coenzyme binding;cofactor binding;glutamate binding;glutamate-cysteine ligase activity;ion binding;ligase activity;ligase activity, forming carbon-nitrogen bonds;magnesium ion binding;meta…	cell part;cytoplasmic part;cytosol;glutamate-cysteine ligase complex;intracellular part;macromolecular complex;protein complex	24.6796	25.0481	24.8752	24.7827	26.5259	26.5951	26.4554	26.0524
E9PSE5;E9PIA8;P50897	Palmitoyl-protein thioesterase 1	PPT1	1.55635	0.639161	1	1	172	172	10016	17091	56243000	9	adult behavior;adult locomotory behavior;anatomical structure development;associative learning;behavior;biological regulation;brain development;catabolic process;cation homeostasis;cell development;cellular catabolic process;cellular cation homeostasis;cellular chemical homeostasis;cellular component organization;cellular component organization or biogenesis;cellular developmental process;cellula…	acyl-CoA thioesterase activity;catalytic activity;CoA hydrolase activity;hydrolase activity;hydrolase activity, acting on ester bonds;palmitoyl-(protein) hydrolase activity;palmitoyl-CoA hydrolase activity;thiolester hydrolase activity	axon;cell body;cell part;cell projection;clathrin-coated vesicle;coated vesicle;cytoplasmic membrane-bounded vesicle;cytoplasmic part;cytoplasmic vesicle;cytosol;dendrite;extracellular membrane-bounded organelle;extracellular organelle;extracellular region;extracellular region part;extracellular space;extracellular vesicular exosome;Golgi apparatus;intracellular membrane-bounded organelle;intrace…	23.2654	21.8101	21.5898	21.0587	23.244	21.9957	22.1428	26.5669
Q9BVC5;C9J4K0	Ashwin	C2orf49	1.55044	1.02083	3	3	159	159	25858	77811	50615000	12	anatomical structure morphogenesis;developmental process;embryonic morphogenesis		cell part;intracellular part;macromolecular complex;protein complex;tRNA-splicing ligase complex	22.7658	21.5833	21.2488	22.7854	23.3632	24.5737	24.7942	21.854
Q69YM4;E9PRM7;A0A0J9YWM3;A0A024RCG2;Q96BI1	Solute carrier family 22 member 18	DKFZp667A184;SLC22A18	1.54429	2.23341	1	1	109	109	11609	40688	23830000	3	cation transport;cellular process;drug transmembrane transport;drug transport;establishment of localization;excretion;ion transport;multicellular organismal process;organic cation transport;secretion;system process;transmembrane transport;transport	active transmembrane transporter activity;binding;drug transmembrane transporter activity;enzyme binding;protein binding;secondary active transmembrane transporter activity;symporter activity;transmembrane transporter activity;transporter activity;ubiquitin protein ligase binding	apical plasma membrane;cell part;cytoplasm;envelope;integral to membrane;intracellular organelle part;intracellular part;intrinsic to membrane;membrane;membrane part;nuclear envelope;nuclear part;organelle envelope;organelle part;plasma membrane;plasma membrane part	20.9888	21.1999	21.3831	21.8164	22.5789	23.2767	23.5694	22.1404
A0AVK6	Transcription factor E2F8	E2F8	1.5433	1.38161	2	2	32	32	94165	24779	3776200	3	anatomical structure development;anatomical structure formation involved in morphogenesis;angiogenesis;biological regulation;cell cycle;cell cycle comprising mitosis without cytokinesis;cell differentiation;cell differentiation involved in embryonic placenta development;cell proliferation;cellular developmental process;cellular process;chorionic trophoblast cell differentiation;developmental proc…	binding;core promoter binding;core promoter proximal region DNA binding;core promoter proximal region sequence-specific DNA binding;DNA binding;nucleic acid binding;nucleic acid binding transcription factor activity;protein binding transcription factor activity;regulatory region DNA binding;regulatory region nucleic acid binding;RNA polymerase II core promoter proximal region sequence-specific DN…	cell part;intracellular membrane-bounded organelle;intracellular organelle;intracellular organelle part;intracellular part;macromolecular complex;membrane-bounded organelle;nuclear part;nucleoplasm part;nucleus;organelle;organelle part;protein complex;transcription factor complex	19.714	19.7642	19.8283	20.188	19.9884	21.6171	21.2229	22.8393
A8K7A0;P49643;A0A024RD43;A0A024RD63	DNA primase large subunit	PRIM2;PRIM2A	1.54131	2.15128	4	4	84	84	58833	32379	87177000	6	anatomical structure homeostasis;biological regulation;biosynthetic process;cell cycle;cell cycle process;cellular biosynthetic process;cellular component organization;cellular component organization at cellular level;cellular component organization or biogenesis;cellular component organization or biogenesis at cellular level;cellular macromolecule biosynthetic process;cellular macromolecule meta…	4 iron, 4 sulfur cluster binding;binding;catalytic activity;cation binding;DNA binding;DNA primase activity;DNA-directed RNA polymerase activity;ion binding;iron-sulfur cluster binding;metal cluster binding;metal ion binding;nucleic acid binding;nucleotidyltransferase activity;RNA polymerase activity;transferase activity;transferase activity, transferring phosphorus-containing groups	cell part;intracellular organelle part;intracellular part;nuclear part;nucleoplasm;organelle part	23.3821	22.9544	23.7364	22.4634	25.3576	24.6005	24.6981	24.0453
H0Y449;P67809;A0JLU4;Q6PKI6;Q7KZ24	Nuclease-sensitive element-binding protein 1	YBX1	1.54094	3.52395	7	6	291	291	41905	92115	137370000	36	biological regulation;biosynthetic process;cellular biosynthetic process;cellular macromolecule biosynthetic process;cellular macromolecule metabolic process;cellular metabolic process;cellular nitrogen compound metabolic process;cellular process;chordate embryonic development;CRD-mediated mRNA stabilization;developmental process;embryo development;embryo development ending in birth or egg hatchi…	binding;core promoter proximal region DNA binding;core promoter proximal region sequence-specific DNA binding;DNA binding;double-stranded DNA binding;enzyme binding;GTPase binding;nucleic acid binding;nucleic acid binding transcription factor activity;protein binding;regulatory region DNA binding;regulatory region nucleic acid binding;RNA binding;RNA polymerase II core promoter proximal region se…	cell part;CRD-mediated mRNA stability complex;cytoplasm;cytoplasmic part;extracellular membrane-bounded organelle;extracellular organelle;extracellular region part;extracellular vesicular exosome;histone pre-mRNA 3'end processing complex;intracellular membrane-bounded organelle;intracellular non-membrane-bounded organelle;intracellular organelle;intracellular organelle part;intracellular part;mac…	23.3979	24.0198	24.2133	23.984	25.3238	25.6668	25.583	25.2052
B4E042;A2RRL5;B4DZT7;P15812;B4E057	T-cell surface glycoprotein CD1e, membrane-associated;T-cell surface glycoprotein CD1e, soluble	CD1E	1.54071	0.956334	3	3	181	181	26965	12654	80875000	5	antigen processing and presentation;antigen processing and presentation of exogenous antigen;antigen processing and presentation of lipid antigen via MHC class Ib;antigen processing and presentation via MHC class Ib;antigen processing and presentation, exogenous lipid antigen via MHC class Ib;immune response;immune system process;response to stimulus	antigen binding;beta-2-microglobulin binding;binding;endogenous lipid antigen binding;exogenous lipid antigen binding;lipid antigen binding;lipid binding;lipopeptide binding;peptide binding;protein binding	cell part;cytoplasmic part;early endosome;endosome;Golgi apparatus part;Golgi membrane;integral to membrane;integral to plasma membrane;intracellular membrane-bounded organelle;intracellular organelle;intracellular organelle lumen;intracellular organelle part;intracellular part;intrinsic to membrane;intrinsic to plasma membrane;late endosome;lysosomal lumen;membrane;membrane part;membrane-bounded…	23.3063	22.6601	21.2552	22.2696	26.0085	23.0948	23.1125	23.4383
F8WAY9;C9JTZ9;Q14188	Transcription factor Dp-2	TFDP2	1.5401	1.5402	1	1	171	171	75155	40335	14423000	3	anatomical structure development;biological regulation;biosynthetic process;cell cycle;cell surface receptor linked signaling pathway;cellular biosynthetic process;cellular macromolecule biosynthetic process;cellular macromolecule metabolic process;cellular metabolic process;cellular nitrogen compound metabolic process;cellular process;cellular response to stimulus;developmental process;enzyme li…	binding;DNA binding;nucleic acid binding;nucleic acid binding transcription factor activity;protein binding;protein binding transcription factor activity;protein domain specific binding;sequence-specific DNA binding RNA polymerase II transcription factor activity;sequence-specific DNA binding transcription factor activity;transcription cofactor activity;transcription factor binding;transcription …	cell part;intracellular membrane-bounded organelle;intracellular organelle;intracellular organelle part;intracellular part;macromolecular complex;membrane-bounded organelle;nuclear part;nucleoplasm;nucleoplasm part;nucleus;organelle;organelle part;protein complex;transcription factor complex	19.97	20.4451	20.925	20.5965	21.3645	22.9821	22.7727	20.9776
G3V3G9;B7Z2P6;B7Z8C9;Q5TAQ9	DDB1- and CUL4-associated factor 8	DCAF8	1.53963	1.65832	5	3	73	36	84752	16427	36347000	13	cellular macromolecule metabolic process;cellular metabolic process;cellular process;cellular protein metabolic process;macromolecule metabolic process;macromolecule modification;metabolic process;primary metabolic process;protein metabolic process;protein modification by small protein conjugation;protein modification by small protein conjugation or removal;protein modification process;protein ub…		cell part;CUL4 RING ubiquitin ligase complex;cullin-RING ubiquitin ligase complex;cytoplasm;cytoplasmic part;intracellular membrane-bounded organelle;intracellular organelle;intracellular part;macromolecular complex;membrane-bounded organelle;microbody;nucleus;organelle;peroxisome;protein complex;ubiquitin ligase complex	21.0651	22.0426	21.9139	22.8001	22.6726	24.2518	23.8835	23.1723
Q6PJG6	BRCA1-associated ATM activator 1	BRAT1	1.53597	2.80047	7	7	105	105	88118	15905	153460000	35	response to abiotic stimulus;response to ionizing radiation;response to radiation;response to stimulus		cell part;intracellular membrane-bounded organelle;intracellular organelle;intracellular part;membrane;membrane-bounded organelle;nucleus;organelle	23.4989	23.8797	23.9142	24.0736	24.7306	25.4386	25.9706	25.3705
Q9H398;O95219	Sorting nexin-4	SNX4	1.53593	1.0492	1	1	78	78	20724	29187	2194400	2	cellular component organization;cellular component organization at cellular level;cellular component organization or biogenesis;cellular component organization or biogenesis at cellular level;cellular process;endocytic recycling;endosome transport;establishment of localization;establishment of localization in cell;establishment of protein localization;intracellular transport;organelle organizatio…	binding;epidermal growth factor receptor binding;growth factor receptor binding;insulin receptor binding;lipid binding;phosphatidylinositol binding;phospholipid binding;protein binding;protein complex binding;receptor binding	cell part;cytoplasm;cytoplasmic dynein complex;cytoplasmic part;cytoskeletal part;dynein complex;early endosome membrane;endosomal part;endosome membrane;extrinsic to membrane;intracellular organelle part;intracellular part;macromolecular complex;membrane;membrane part;microtubule associated complex;organelle membrane;organelle part;plasma membrane;protein complex;SNARE complex	19.1887	19.7047	18.9737	21.2791	19.6711	21.9741	21.8137	21.8311
O14524	Transmembrane protein 194A	TMEM194A	1.52643	2.5644	1	1	18	18	50639	17271	31300000	4			cell part;integral to membrane;intrinsic to membrane;membrane part	21.409	21.4998	22.1017	22.1915	22.8313	23.6677	23.7956	23.0131
P83111;H0YNN5	Serine beta-lactamase-like protein LACTB, mitochondrial	LACTB	1.52494	3.12256	2	2	42	42	60693	63576	22246000	6		catalytic activity;hydrolase activity	cell part;cytoplasm;cytoplasmic part;intracellular membrane-bounded organelle;intracellular organelle;intracellular part;membrane-bounded organelle;mitochondrion;organelle	21.2035	21.359	20.9169	21.7294	22.4079	22.8229	23.2588	22.8188
Q9BTG3;Q5SYW2;A0A024R885;B7Z3U7;F5H2X7;Q9ULV3;H0Y5D5;B4E0A3;Q96KB7	Cip1-interacting zinc finger protein	CIZ1	1.52403	2.96049	12	12	215	215	92787	40167	110450000	25	biological regulation;cellular process;maintenance of location;maintenance of location in cell;maintenance of protein localization to organelle;maintenance of protein location;maintenance of protein location in cell;maintenance of protein location in nucleus;positive regulation of biological process;positive regulation of biosynthetic process;positive regulation of cellular biosynthetic process;p…	binding;cation binding;ion binding;metal ion binding;nucleic acid binding;transition metal ion binding;zinc ion binding	cell part;intracellular membrane-bounded organelle;intracellular organelle;intracellular part;membrane-bounded organelle;nucleus;organelle	23.3952	23.6681	24.1518	23.0483	25.2651	24.8777	25.3151	24.9015
Q8N806;B2RDC9;E9PCJ7;Q05DA8	Putative E3 ubiquitin-protein ligase UBR7	UBR7	1.52306	3.31806	5	5	184	184	47998	19292	150360000	13	cellular macromolecule metabolic process;cellular metabolic process;cellular process;cellular protein metabolic process;macromolecule metabolic process;macromolecule modification;metabolic process;primary metabolic process;protein metabolic process;protein modification by small protein conjugation;protein modification by small protein conjugation or removal;protein modification process;protein ub…	binding;catalytic activity;cation binding;ion binding;ligase activity;metal ion binding;transition metal ion binding;zinc ion binding	cell part;cytoplasm;intracellular part	23.7792	24.1037	23.9989	24.2604	25.0499	25.9495	25.7826	25.4524
Q15203;Q7KZ52;B8ZZQ6;V9HVW6;Q15202;Q8TBK9;Q86YS2;Q53S24;Q15204;P06454	Prothymosin alpha;Prothymosin alpha, N-terminally processed;Thymosin alpha-1	PTMA;PTMAP7	1.51881	1.12171	1	1	192	192	81611	86171	46574000	5	biosynthetic process;cellular biosynthetic process;cellular macromolecule biosynthetic process;cellular macromolecule metabolic process;cellular metabolic process;cellular nitrogen compound metabolic process;cellular process;macromolecule biosynthetic process;macromolecule metabolic process;metabolic process;nitrogen compound metabolic process;nucleic acid metabolic process;nucleobase-containing …		cell part;cytoplasm;extracellular membrane-bounded organelle;extracellular organelle;extracellular region part;extracellular vesicular exosome;intracellular membrane-bounded organelle;intracellular organelle;intracellular organelle part;intracellular part;membrane-bounded organelle;membrane-bounded vesicle;nuclear part;nucleoplasm;nucleus;organelle;organelle part;vesicle	21.5947	22.6391	22.7286	22.9563	22.5739	23.895	23.8386	25.6865
A0A024R4C8;B4DZS0;O76075	DNA fragmentation factor subunit beta	DFFB	1.51461	1.43518	2	2	65	65	39081	6009	18749000	2	anatomical structure development;apoptosis;apoptotic chromosome condensation;brain development;catabolic process;cell death;cellular catabolic process;cellular component disassembly;cellular component disassembly at cellular level;cellular component disassembly involved in apoptosis;cellular component organization;cellular component organization at cellular level;cellular component organization o…	binding;catalytic activity;deoxyribonuclease activity;DNA binding;enzyme binding;hydrolase activity;hydrolase activity, acting on ester bonds;nuclease activity;nucleic acid binding;protein binding	cell part;chromatin;chromosomal part;cytoplasm;cytoplasmic part;cytosol;intracellular membrane-bounded organelle;intracellular non-membrane-bounded organelle;intracellular organelle;intracellular organelle part;intracellular part;membrane-bounded organelle;non-membrane-bounded organelle;nuclear chromatin;nuclear chromosome part;nuclear part;nucleolus;nucleoplasm;nucleus;organelle;organelle part	20.2708	20.6049	20.5164	20.5373	22.5474	23.2954	21.274	20.8711
Q6IAA8;H0YFI1;F5H479;F5GX19;F5H3Y3	Ragulator complex protein LAMTOR1	LAMTOR1	1.5112	1.24384	4	4	335	335	17745	19514	76922000	10	biological regulation;cell growth;cellular component organization;cellular component organization at cellular level;cellular component organization or biogenesis;cellular component organization or biogenesis at cellular level;cellular localization;cellular macromolecule localization;cellular process;cellular protein localization;cellular response to acid;cellular response to amine stimulus;cellul…		cell part;cytoplasmic part;endosomal part;endosome membrane;extracellular membrane-bounded organelle;extracellular organelle;extracellular region part;extracellular vesicular exosome;Golgi apparatus;intracellular membrane-bounded organelle;intracellular organelle;intracellular organelle part;intracellular part;late endosome membrane;lysosomal membrane;lysosome;lytic vacuole;macromolecular complex…	23.7412	22.4495	22.0223	21.9326	25.3989	23.22	23.4502	24.1213
P52735	Guanine nucleotide exchange factor VAV2	VAV2	1.50281	1.45684	2	2	34	34	10129	51445	9442600	2	anatomical structure formation involved in morphogenesis;angiogenesis;axon guidance;biological regulation;blood coagulation;cell activation;cell migration;cell motility;cell projection assembly;cell projection organization;cell surface receptor linked signaling pathway;cellular component assembly;cellular component assembly at cellular level;cellular component movement;cellular component organiza…	binding;cation binding;enzyme regulator activity;GTPase regulator activity;guanyl-nucleotide exchange factor activity;ion binding;metal ion binding;nucleoside-triphosphatase regulator activity;Ras guanyl-nucleotide exchange factor activity;Rho guanyl-nucleotide exchange factor activity;small GTPase regulator activity	cell part;cytoplasmic part;cytosol;intracellular part;membrane;plasma membrane	21.6065	21.5925	20.8125	20.9222	21.3998	22.6029	23.1148	23.8274
A8K4Q6;O14867	Transcription regulator protein BACH1	BACH1	1.49114	1.32361	5	5	86	86	81856	17518	23385000	12	biological regulation;biosynthetic process;cell cycle process;cellular biosynthetic process;cellular macromolecule biosynthetic process;cellular macromolecule metabolic process;cellular metabolic process;cellular nitrogen compound metabolic process;cellular process;cellular response to stimulus;cellular response to stress;DNA metabolic process;DNA repair;macromolecule biosynthetic process;macromo…	binding;cation binding;DNA binding;enhancer binding;enhancer sequence-specific DNA binding;heme binding;ion binding;iron ion binding;metal ion binding;nucleic acid binding;nucleic acid binding transcription factor activity;regulatory region DNA binding;regulatory region nucleic acid binding;RNA polymerase II core promoter proximal region sequence-specific DNA binding transcription factor activity…	cell part;cytoplasm;intracellular membrane-bounded organelle;intracellular organelle;intracellular organelle part;intracellular part;membrane-bounded organelle;nuclear part;nucleoplasm;nucleus;organelle;organelle part	22.6181	21.2276	22.0784	20.4336	22.8892	23.7505	23.5326	22.1499
A0A1U9X8E3;A0A1U9X8E2;A0A1U9X8D7;P28065;A2ACR0;A0A0G2JJQ0;B4DZW2;A0A0G2JJ13;A0A0G2JHI2;A2ACR1;A0A0G2JJA7	Proteasome subunit beta type-9;Proteasome subunit beta type	PSMB9;PSM9	1.48682	1.59876	2	2	91	91	23278	48963	29816000	7	activation of immune response;activation of innate immune response;anaphase-promoting complex-dependent proteasomal ubiquitin-dependent protein catabolic process;antigen processing and presentation;antigen processing and presentation of exogenous antigen;antigen processing and presentation of exogenous peptide antigen;antigen processing and presentation of exogenous peptide antigen via MHC class …	catalytic activity;endopeptidase activity;hydrolase activity;peptidase activity;peptidase activity, acting on L-amino acid peptides;threonine-type endopeptidase activity;threonine-type peptidase activity	cell part;cytoplasm;cytoplasmic part;cytosol;extracellular membrane-bounded organelle;extracellular organelle;extracellular region part;extracellular vesicular exosome;intracellular membrane-bounded organelle;intracellular organelle;intracellular organelle part;intracellular part;macromolecular complex;membrane-bounded organelle;membrane-bounded vesicle;nuclear part;nucleoplasm;nucleus;organelle;…	22.2854	22.7441	21.0851	21.1987	22.4498	23.4768	23.7058	23.6282
B2RA91;F8VXG7;Q99590;Q05BS8;A0A0A0MTP7;B4DZM2	Protein SCAF11	SCAF11;SFRS2IP	1.481	2.16503	10	10	125	125	12892	2545	93779000	15	cellular component assembly;cellular component assembly at cellular level;cellular component organization;cellular component organization at cellular level;cellular component organization or biogenesis;cellular component organization or biogenesis at cellular level;cellular macromolecular complex assembly;cellular macromolecular complex subunit organization;cellular macromolecule metabolic proces…	binding;cation binding;ion binding;metal ion binding;transition metal ion binding;zinc ion binding	cell part;intracellular membrane-bounded organelle;intracellular non-membrane-bounded organelle;intracellular organelle;intracellular organelle part;intracellular part;membrane-bounded organelle;non-membrane-bounded organelle;nuclear part;nucleolus;nucleoplasm;nucleus;organelle;organelle part	22.8401	23.5744	23.2489	23.2648	24.5009	25.6689	24.1078	24.5746
Q75MP1;B3KY43;Q6DHZ2;A0A024R712;P31323	cAMP-dependent protein kinase type II-beta regulatory subunit	PRKAR2B	1.4802	1.17645	1	1	52	52	34118	3272	6019500	2	activation of phospholipase C activity;activation of protein kinase A activity;activation of protein kinase activity;behavior;biological regulation;blood coagulation;carboxylic acid metabolic process;cell cycle;cell cycle process;cell surface receptor linked signaling pathway;cellular component organization;cellular component organization at cellular level;cellular component organization or bioge…	adenyl nucleotide binding;adenyl ribonucleotide binding;AMP binding;binding;cAMP binding;cAMP-dependent protein kinase inhibitor activity;cAMP-dependent protein kinase regulator activity;catalytic activity;cyclic nucleotide binding;enzyme binding;enzyme inhibitor activity;enzyme regulator activity;kinase activity;kinase binding;kinase inhibitor activity;kinase regulator activity;nucleotide bindin…	cAMP-dependent protein kinase complex;cell part;cell projection;cell projection part;centrosome;cytoplasm;cytoplasmic part;cytoskeletal part;cytosol;dendritic shaft;dendritic spine;extracellular membrane-bounded organelle;extracellular organelle;extracellular region part;extracellular vesicular exosome;intracellular non-membrane-bounded organelle;intracellular organelle;intracellular organelle pa…	20.6798	21.2148	20.271	19.4356	20.7224	21.2036	22.5961	23
Q9NXX6	Non-structural maintenance of chromosomes element 4 homolog A	NSMCE4A	1.48013	0.915951	1	1	36	36	44301	29583	8528200	4	biological regulation;cellular macromolecule metabolic process;cellular metabolic process;cellular nitrogen compound metabolic process;cellular process;cellular protein metabolic process;cellular response to stimulus;cellular response to stress;DNA metabolic process;DNA recombination;DNA repair;macromolecule metabolic process;macromolecule modification;metabolic process;nitrogen compound metaboli…		cell part;chromosomal part;chromosome, telomeric region;intracellular organelle part;intracellular part;macromolecular complex;nuclear part;nucleoplasm;organelle part;protein complex;Smc5-Smc6 complex	21.4119	19.3537	22.7103	19.6545	21.6765	22.7527	22.1277	22.494
B3KU55;H0Y2M0;A2VDJ0;B3KMA3	Transmembrane protein 131-like	KIAA0922	1.4788	2.88708	6	6	68	68	99526	80323	28461000	9	biological regulation;cell surface receptor linked signaling pathway;cellular process;cellular response to stimulus;negative regulation of biological process;negative regulation of canonical Wnt receptor signaling pathway;negative regulation of cell activation;negative regulation of cell communication;negative regulation of cell proliferation;negative regulation of cellular process;negative regul…		cell part;cytoplasm;cytoplasmic part;endoplasmic reticulum;integral to membrane;intracellular membrane-bounded organelle;intracellular organelle;intracellular part;intrinsic to membrane;membrane;membrane part;membrane-bounded organelle;organelle;plasma membrane	21.2521	21.3515	22.0395	21.8909	22.8275	23.3363	23.4799	22.8054
E5RGX5;B7Z4N6;Q93045	Stathmin;Stathmin-2	STMN2	1.4783	2.43194	1	1	6	6	19574	42557	151560000	6	biological regulation;negative regulation of biological process;negative regulation of cell projection organization;negative regulation of cellular component organization;negative regulation of cellular process;negative regulation of cytoskeleton organization;negative regulation of microtubule depolymerization;negative regulation of microtubule polymerization;negative regulation of microtubule po…	binding;calcium-dependent protein binding;cytoskeletal protein binding;protein binding;tubulin binding	axon;cell body;cell part;cell projection;cell projection part;cytoplasm;cytoplasmic part;endosome;Golgi apparatus;growth cone;intracellular membrane-bounded organelle;intracellular organelle;intracellular part;lamellipodium;membrane;membrane-bounded organelle;neuron projection;neuronal cell body;organelle;perinuclear region of cytoplasm;site of polarized growth;vesicle	24.0965	24.0914	24.3515	24.2565	24.7762	25.7096	26.1372	26.0861
E7EP87;A0A088AWN8;Q9UHQ1;B3KSJ1	Nuclear prelamin A recognition factor	NARF	1.47778	0.633461	6	5	177	155	56073	28537	32380000	9		binding;lamin binding;protein binding	cell part;cytoskeletal part;intermediate filament;intracellular membrane-bounded organelle;intracellular non-membrane-bounded organelle;intracellular organelle;intracellular organelle lumen;intracellular organelle part;intracellular part;lamin filament;macromolecular complex;membrane-bounded organelle;membrane-enclosed lumen;non-membrane-bounded organelle;nuclear lamina;nuclear lumen;nuclear part…	20.3468	19.6872	22.133	22.074	24.6875	20.1818	22.8657	22.4172
Q8IV50	LysM and putative peptidoglycan-binding domain-containing protein 2	LYSMD2	1.47507	2.5455	2	2	93	93	23463	29468	20604000	6				20.8767	20.8227	21.454	21.2679	21.9579	22.3379	23.0796	22.9461
A0A0R4J2G3;A0A0A0MTJ9;Q6PIU2;H7C046	Neutral cholesterol ester hydrolase 1	NCEH1	1.47306	2.95615	7	7	20	20	49062	23442	185730000	29	biological regulation;catabolic process;cellular macromolecule metabolic process;cellular metabolic process;cellular process;cellular protein metabolic process;cellular response to stimulus;dephosphorylation;lipid catabolic process;lipid metabolic process;macromolecule metabolic process;macromolecule modification;metabolic process;phosphate-containing compound metabolic process;phosphorus metabol…	anion binding;binding;carboxylic ester hydrolase activity;catalytic activity;hydrolase activity;hydrolase activity, acting on ester bonds;ion binding;phosphate ion binding;serine hydrolase activity	cell part;cytoplasmic part;endoplasmic reticulum;integral to membrane;intracellular membrane-bounded organelle;intracellular organelle;intracellular part;intrinsic to membrane;membrane;membrane part;membrane-bounded organelle;organelle	23.9456	23.937	24.566	23.7844	25.8582	25.8133	25.3496	25.104
F5H4N4;Q9NR77	Peroxisomal membrane protein 2	PXMP2	1.47226	0.91836	2	2	75	75	17555	40561	8448900	2			cell part;cytoplasm;cytoplasmic part;integral to membrane;intracellular membrane-bounded organelle;intracellular organelle;intracellular organelle part;intracellular part;intrinsic to membrane;macromolecular complex;membrane;membrane part;membrane-bounded organelle;microbody;microbody membrane;microbody part;mitochondrion;organelle;organelle membrane;organelle part;peroxisomal membrane;peroxisoma…	18.7539	21.9852	19.3633	19.6791	21.6885	22.0214	20.222	21.7387
B2RAQ8;A0A024R5F4;P50416	Carnitine O-palmitoyltransferase 1, liver isoform	CPT1A	1.4704	2.40722	9	9	145	145	88339	81677	1187900000	87	acylglycerol metabolic process;alcohol metabolic process;amine metabolic process;amine transport;amino acid transmembrane transport;amino acid transport;behavior;betaine metabolic process;betaine transport;biological regulation;carbohydrate metabolic process;carboxylic acid catabolic process;carboxylic acid metabolic process;carboxylic acid transport;carnitine metabolic process;carnitine shuttle;…	carnitine O-acyltransferase activity;carnitine O-palmitoyltransferase activity;catalytic activity;O-acyltransferase activity;O-palmitoyltransferase activity;palmitoyltransferase activity;transferase activity;transferase activity, transferring acyl groups;transferase activity, transferring acyl groups other than amino-acyl groups	cell part;cytoplasmic part;integral to membrane;integral to mitochondrial membrane;integral to mitochondrial outer membrane;integral to organelle membrane;intracellular membrane-bounded organelle;intracellular organelle;intracellular organelle part;intracellular part;intrinsic to membrane;intrinsic to mitochondrial outer membrane;intrinsic to organelle membrane;membrane;membrane part;membrane-bou…	26.4214	27.0761	27.0361	27.15	28.5319	28.8757	28.5622	27.5954
H3BSM7;A0A024QZE6;Q96GQ5;B4E381;H3BR29;H3BTA0;H3BS97;B4DKB6	RUS1 family protein C16orf58	C16orf58	1.46818	1.78614	4	4	105	105	50783	86824	161580000	19			cell part;integral to membrane;intrinsic to membrane;membrane;membrane part	24.438	24.3399	23.7096	24.0245	26.0866	26.274	25.5876	24.4363
B4DXN3;F8VUA2;F8VVT7;Q9HD42	Charged multivesicular body protein 1a	CHMP1A	1.46447	1.49816	2	2	124	124	15301	465	64518000	6	biological regulation;biosynthetic process;carbon catabolite regulation of transcription;carbon catabolite repression of transcription;cell communication;cell cycle process;cell division;cellular biosynthetic process;cellular component organization;cellular component organization at cellular level;cellular component organization or biogenesis;cellular component organization or biogenesis at cellu…	binding;catalytic activity;cation binding;hydrolase activity;identical protein binding;ion binding;metal ion binding;metallopeptidase activity;peptidase activity;peptidase activity, acting on L-amino acid peptides;protein binding;protein dimerization activity;protein domain specific binding;protein homodimerization activity;transition metal ion binding;zinc ion binding	cell part;chromosome;condensed chromosome;condensed nuclear chromosome;cytoplasmic part;cytoskeletal part;early endosome;endomembrane system;endosomal part;endosome;ESCRT III complex;extracellular membrane-bounded organelle;extracellular organelle;extracellular region part;extracellular vesicular exosome;intracellular membrane-bounded organelle;intracellular non-membrane-bounded organelle;intrace…	22.2779	22.6741	23.19	23.5875	23.1	24.5945	24.9253	24.9676
Q6P2S0;Q659G3;E9PE20;A0A024R3P3;P49458	Signal recognition particle 9 kDa protein	SRP9;DKFZp564M2223	1.4629	0.491392	2	2	388	388	57685	1725	177910000	12	biological regulation;biosynthetic process;cellular biosynthetic process;cellular macromolecule biosynthetic process;cellular macromolecule metabolic process;cellular metabolic process;cellular process;cellular protein metabolic process;cotranslational protein targeting to membrane;establishment of localization;establishment of localization in cell;establishment of protein localization;establishm…	7S RNA binding;binding;nucleic acid binding;ribonucleoprotein binding;RNA binding;signal recognition particle binding	cell part;cytoplasmic part;cytosol;endoplasmic reticulum part;extracellular membrane-bounded organelle;extracellular organelle;extracellular region part;extracellular vesicular exosome;intracellular organelle part;intracellular part;macromolecular complex;membrane part;membrane-bounded organelle;membrane-bounded vesicle;organelle;organelle part;protein complex;receptor complex;ribonucleoprotein c…	25.0943	24.0504	22.7774	22.4052	25.2607	23.2039	23.3258	28.3885
Q5JRA6	Melanoma inhibitory activity protein 3	MIA3	1.46142	1.80506	7	7	48	48	2137	16636	66890000	6	anatomical structure development;biological regulation;cell development;cellular component organization;cellular component organization at cellular level;cellular component organization or biogenesis;cellular component organization or biogenesis at cellular level;cellular developmental process;cellular process;chondrocyte development;collagen fibril organization;developmental process;establishmen…		cell part;cytoplasmic part;endoplasmic reticulum membrane;endoplasmic reticulum part;integral to membrane;intracellular membrane-bounded organelle;intracellular organelle;intracellular organelle part;intracellular part;intrinsic to membrane;membrane;membrane part;membrane-bounded organelle;organelle;organelle membrane;organelle part	22.7684	22.6459	22.3759	22.7397	23.7252	25.0381	24.5176	23.0948
Q53SS8;Q15365	Poly(rC)-binding protein 1	PCBP1	1.46036	5.11747	13	10	632	522	37497	13903	4324200000	131	biological regulation;cellular macromolecule metabolic process;cellular metabolic process;cellular nitrogen compound metabolic process;cellular process;gene expression;macromolecule metabolic process;metabolic process;mRNA metabolic process;mRNA processing;negative regulation of biological process;negative regulation of cellular metabolic process;negative regulation of cellular process;negative r…	binding;DNA binding;nucleic acid binding;RNA binding;single-stranded DNA binding;structure-specific DNA binding	cell part;cytoplasm;extracellular membrane-bounded organelle;extracellular organelle;extracellular region part;extracellular vesicular exosome;intracellular membrane-bounded organelle;intracellular organelle;intracellular organelle part;intracellular part;macromolecular complex;membrane;membrane-bounded organelle;membrane-bounded vesicle;nuclear part;nucleoplasm;organelle;organelle part;ribonucle…	28.9172	28.9233	29.0691	28.9593	30.3273	30.2169	30.5148	30.6512
B7Z829;B7ZLA9;Q9C0E8;B7Z7F5	Protein lunapark	KIAA1715;LNP	1.4541	0.527282	3	3	114	114	39457	75785	35523000	8	anatomical structure development;anatomical structure morphogenesis;appendage development;appendage morphogenesis;biological regulation;blood coagulation;cellular component organization;cellular component organization at cellular level;cellular component organization or biogenesis;cellular component organization or biogenesis at cellular level;cellular process;coagulation;developmental process;em…	binding;cation binding;ion binding;metal ion binding	cell part;cytoplasmic part;endoplasmic reticulum membrane;endoplasmic reticulum part;endoplasmic reticulum tubular network;integral to membrane;intracellular organelle part;intracellular part;intrinsic to membrane;membrane;membrane part;organelle membrane;organelle part	21.8393	19.4995	22.164	22.4877	22.7686	21.2455	21.7525	26.0403
Q13433;B4DWH6	Zinc transporter ZIP6	SLC39A6	1.45257	2.64802	5	5	97	97	85046	17867	43448000	9	biological regulation;cation homeostasis;cation transport;cellular cation homeostasis;cellular chemical homeostasis;cellular divalent inorganic cation homeostasis;cellular homeostasis;cellular ion homeostasis;cellular process;cellular zinc ion homeostasis;chemical homeostasis;divalent inorganic cation homeostasis;divalent inorganic cation transport;divalent metal ion transport;establishment of lo…	cation transmembrane transporter activity;divalent inorganic cation transmembrane transporter activity;inorganic cation transmembrane transporter activity;ion transmembrane transporter activity;metal ion transmembrane transporter activity;substrate-specific transmembrane transporter activity;substrate-specific transporter activity;transition metal ion transmembrane transporter activity;transmembr…	cell part;cell projection membrane;cell projection part;cell surface;cytoplasmic part;endoplasmic reticulum;integral to membrane;integral to plasma membrane;intracellular membrane-bounded organelle;intracellular organelle;intracellular part;intrinsic to membrane;intrinsic to plasma membrane;lamellipodium membrane;leading edge membrane;membrane;membrane part;membrane-bounded organelle;organelle;pl…	22.1176	22.304	22.0542	21.8236	23.8065	23.8543	23.7205	22.7284
Q549C5;Q53GB0;Q9NS69	Mitochondrial import receptor subunit TOM22 homolog	MST065;TOMM22	1.45196	1.09759	2	2	261	261	15521	70715	5400400	2	cellular component organization;cellular component organization at cellular level;cellular component organization or biogenesis;cellular component organization or biogenesis at cellular level;cellular macromolecule metabolic process;cellular membrane organization;cellular metabolic process;cellular process;cellular protein metabolic process;establishment of localization;establishment of localizat…	macromolecule transmembrane transporter activity;protein transmembrane transporter activity;protein transporter activity;substrate-specific transmembrane transporter activity;substrate-specific transporter activity;transmembrane transporter activity;transporter activity	cell part;cytoplasmic part;integral to membrane;intracellular membrane-bounded organelle;intracellular organelle;intracellular organelle part;intracellular part;intrinsic to membrane;macromolecular complex;membrane;membrane part;membrane-bounded organelle;mitochondrial inner membrane;mitochondrial membrane;mitochondrial membrane part;mitochondrial outer membrane;mitochondrial outer membrane trans…	19.3763	19.5839	19.4777	19.9055	20.158	21.2357	19.8782	22.8793
B4DYP5;Q3ZTS7;Q8IZ07	Ankyrin repeat domain-containing protein 13A	ANKRD13;ANKRD13A	1.44937	1.83742	2	2	32	32	67475	2375	5976500	3			cell part;cytoplasmic part;endosome;intracellular membrane-bounded organelle;intracellular organelle;intracellular part;late endosome;membrane;membrane-bounded organelle;organelle;plasma membrane	20.4761	21.1058	21.0204	21.0931	21.8181	22.002	22.1161	23.5565
A0A0S2Z4G4;A0A087WWU8;B2RDE1;Q5HYB6;A0A0S2Z4I4;A0A0S2Z4G8;Q5VU61;D6R904;B4DWT5;Q8NAG3		TPM3;DKFZp686J1372	1.44669	4.07664	21	8	617	165	29032	13647	1949000000	128	actin cytoskeleton organization;actin filament-based movement;actin filament-based process;actin-mediated cell contraction;actin-myosin filament sliding;actomyosin structure organization;anatomical structure morphogenesis;biological regulation;cardiac muscle contraction;cardiac muscle tissue morphogenesis;cell projection organization;cellular component movement;cellular component organization;cel…	actin binding;binding;cytoskeletal protein binding;protein binding;structural constituent of cytoskeleton;structural constituent of muscle;structural molecule activity	actin filament bundle;actomyosin;bleb;cell part;cell projection;cell projection membrane;cell projection part;contractile fiber;contractile fiber part;cytoplasmic part;cytoskeletal part;cytoskeleton;cytosol;filamentous actin;intracellular non-membrane-bounded organelle;intracellular organelle;intracellular organelle part;intracellular part;leading edge membrane;macromolecular complex;membrane par…	27.6347	27.627	27.7233	27.7155	28.9867	29.358	29.3868	28.7559
Q66K91;Q5XPV6;B4DVS0;Q15182;P14678;J3QLE5	Small nuclear ribonucleoprotein-associated protein;Small nuclear ribonucleoprotein-associated proteins B and B	SNRPB;SNRPN	1.44637	1.16807	5	1	281	61	23656	14938	63832000	14	biological regulation;biosynthetic process;cellular biosynthetic process;cellular component assembly;cellular component assembly at cellular level;cellular component organization;cellular component organization at cellular level;cellular component organization or biogenesis;cellular component organization or biogenesis at cellular level;cellular macromolecular complex assembly;cellular macromolec…	binding;histone pre-mRNA DCP binding;nucleic acid binding;RNA binding	catalytic step 2 spliceosome;cell part;cytoplasmic part;cytosol;extracellular membrane-bounded organelle;extracellular organelle;extracellular region part;extracellular vesicular exosome;histone pre-mRNA 3'end processing complex;intracellular membrane-bounded organelle;intracellular organelle;intracellular organelle part;intracellular part;macromolecular complex;membrane-bounded organelle;membran…	22.8457	22.4591	21.5107	23.6153	23.0287	23.4773	24.6153	25.0949
Q96AG4	Leucine-rich repeat-containing protein 59	LRRC59	1.44334	2.66787	2	2	59	59	3493	2485	17439000	6			cell part;cytoplasmic part;endoplasmic reticulum;endoplasmic reticulum membrane;endoplasmic reticulum part;envelope;integral to membrane;intracellular membrane-bounded organelle;intracellular non-membrane-bounded organelle;intracellular organelle;intracellular organelle part;intracellular part;intrinsic to membrane;membrane;membrane part;membrane-bounded organelle;mitochondrial nucleoid;mitochond…	20.6031	21.2104	21.2169	21.0238	21.8047	22.5201	22.9716	22.5313
Q9Y6C9;Q53G34	Mitochondrial carrier homolog 2	MTCH2	1.44058	2.06409	9	3	37	116	33331	239	1565600000	51	cellular localization;cellular macromolecule localization;cellular process;cellular protein localization;establishment of localization;localization;macromolecule localization;protein localization;protein localization in mitochondrion;protein localization to organelle;transport		cell part;cytoplasmic part;extracellular membrane-bounded organelle;extracellular organelle;extracellular region part;extracellular vesicular exosome;integral to membrane;intracellular membrane-bounded organelle;intracellular organelle;intracellular organelle part;intracellular part;intrinsic to membrane;membrane;membrane part;membrane-bounded organelle;membrane-bounded vesicle;mitochondrial inne…	26.9418	27.5491	27.8612	27.6148	28.686	28.6947	28.466	29.8826
A0A024R8T9;O43760;K7ELD9;K7ENG9;K7EJ35	Synaptogyrin;Synaptogyrin-2	SYNGR2	1.43845	3.14588	2	2	89	89	2481	40551	74871000	8	establishment of localization;establishment of localization in cell;establishment of protein localization;intracellular protein transport;intracellular transport;protein targeting;protein transport;transport		cell part;clathrin coated vesicle membrane;clathrin-coated vesicle;coated vesicle;coated vesicle membrane;cytoplasmic membrane-bounded vesicle;cytoplasmic part;cytoplasmic vesicle;cytoplasmic vesicle membrane;cytoplasmic vesicle part;extracellular membrane-bounded organelle;extracellular organelle;extracellular region part;extracellular vesicular exosome;integral to membrane;intracellular membran…	23.2072	23.125	23.1542	23.3831	24.0503	24.6181	24.9585	24.9963
B4DGC1;Q49AQ3;H0YI10;F8VXY1		LASS5;CERS5	1.4326	0.609899	2	1	133	97	2224	42403	8126200	3		binding;DNA binding;nucleic acid binding	cell part;cytoplasmic part;endoplasmic reticulum;integral to membrane;intracellular membrane-bounded organelle;intracellular organelle;intracellular part;intrinsic to membrane;membrane part;membrane-bounded organelle;nucleus;organelle	19.3395	19.15	22.39	20.1593	19.254	22.8055	22.6555	22.0542
P51157	Ras-related protein Rab-28	RAB28	1.4311	1.83743	1	1	59	59	24841	25185	6959700	2	biological regulation;cellular process;cellular response to stimulus;intracellular signal transduction;metabolic process;regulation of biological process;regulation of cellular process;response to stimulus;signal transduction;small GTPase mediated signal transduction	binding;catalytic activity;GDP binding;GTP binding;GTPase activity;guanyl nucleotide binding;guanyl ribonucleotide binding;hydrolase activity;hydrolase activity, acting on acid anhydrides;hydrolase activity, acting on acid anhydrides, in phosphorus-containing anhydrides;nucleoside-triphosphatase activity;nucleotide binding;purine nucleotide binding;purine ribonucleoside triphosphate binding;purin…	cell part;cell projection part;ciliary rootlet;cilium part;cytoplasm;cytoskeletal part;intracellular organelle part;intracellular part;membrane;organelle part;plasma membrane	20.5147	20.8308	21.2041	20.0706	21.2736	22.3179	22.9024	21.8508
Q9NQS1	Cell death regulator Aven	AVEN	1.42508	0.855577	3	3	169	169	38506	15313	22521000	6	apoptosis;biological regulation;cell death;cellular process;death;negative regulation of apoptosis;negative regulation of biological process;negative regulation of cell death;negative regulation of cellular process;negative regulation of programmed cell death;programmed cell death;regulation of apoptosis;regulation of biological process;regulation of cell death;regulation of cellular process;regu…		cell part;endomembrane system;intracellular;membrane	19.9649	20.3737	20.6957	20.9784	23.8118	20.3418	22.7083	20.8511
Q5U091;P01111	GTPase NRas	NRAS	1.4224	1.05274	4	2	27	148	21229	76031	214720000	20	actin cytoskeleton organization;actin filament-based process;activation of immune response;activation of innate immune response;activation of MAPKK activity;activation of protein kinase activity;anatomical structure morphogenesis;associative learning;axon guidance;behavior;biological regulation;blood coagulation;branching morphogenesis of a tube;cell differentiation;cell migration;cell motility;c…	binding;GTP binding;guanyl nucleotide binding;guanyl ribonucleotide binding;nucleotide binding;protein binding;protein complex binding;purine nucleotide binding;purine ribonucleoside triphosphate binding;purine ribonucleotide binding;ribonucleotide binding	cell part;cytoplasmic part;extracellular membrane-bounded organelle;extracellular organelle;extracellular region part;extracellular vesicular exosome;Golgi apparatus;Golgi apparatus part;Golgi membrane;intracellular membrane-bounded organelle;intracellular organelle;intracellular organelle part;intracellular part;membrane;membrane-bounded organelle;membrane-bounded vesicle;organelle;organelle mem…	23.8245	23.9766	24.1831	24.8185	26.7532	26.4739	25.4543	23.811
Q6P2H3;Q9NTB2;H7BZW2	Centrosomal protein of 85 kDa	CEP85;DKFZp434P232	1.41793	2.23935	6	6	11	11	85638	23283	45610000	9			cell part;centrosome;cytoplasm;cytoplasmic part;cytoskeletal part;Golgi apparatus;intracellular membrane-bounded organelle;intracellular non-membrane-bounded organelle;intracellular organelle;intracellular organelle part;intracellular part;membrane-bounded organelle;microtubule organizing center;non-membrane-bounded organelle;nuclear part;nucleolus;organelle;organelle part;spindle pole	21.719	22.1297	21.9193	22.1945	24.2775	22.8098	23.4805	23.0663
Q9BUH6	Protein PAXX	C9orf142	1.4144	2.69647	2	2	113	113	21639	50062	11825000	5	cellular macromolecule metabolic process;cellular metabolic process;cellular nitrogen compound metabolic process;cellular process;cellular response to stimulus;cellular response to stress;DNA ligation;DNA ligation involved in DNA repair;DNA metabolic process;DNA repair;double-strand break repair;double-strand break repair via nonhomologous end joining;macromolecule metabolic process;metabolic pro…	binding;identical protein binding;protein binding;protein dimerization activity;protein homodimerization activity	cell part;extracellular membrane-bounded organelle;extracellular organelle;extracellular region part;extracellular vesicular exosome;intracellular membrane-bounded organelle;intracellular organelle;intracellular part;membrane-bounded organelle;membrane-bounded vesicle;nucleus;organelle;vesicle	20.5305	20.6115	20.5233	20.6295	21.2717	22.1246	22.5766	21.9796
A0A087WTU3;Q53GI2;Q9Y6I9	Testis-expressed sequence 264 protein	TEX264	1.41404	2.10653	3	3	151	151	25966	10644	126840000	14			extracellular membrane-bounded organelle;extracellular organelle;extracellular region part;extracellular vesicular exosome;membrane-bounded organelle;membrane-bounded vesicle;organelle;vesicle	23.4302	24.0187	23.8372	24.2862	24.4386	25.3208	25.5674	25.9017
M0R353;Q6NSJ2	Pleckstrin homology-like domain family B member 3	PHLDB3	1.41402	1.30455	3	3	134	134	26107	51521	17264000	4		binding;enzyme binding;protein binding		20.9013	21.0743	20.7184	21.0329	20.6566	22.6428	23.0294	23.0542
P78345;Q5VUC3;Q5VUC9	Ribonuclease P protein subunit p38	RPP38	1.41343	0.2761	4	4	124	124	31834	53698	1256100000	6	cellular macromolecule metabolic process;cellular metabolic process;cellular nitrogen compound metabolic process;cellular process;macromolecule metabolic process;metabolic process;ncRNA metabolic process;ncRNA processing;nitrogen compound metabolic process;nucleic acid metabolic process;nucleobase-containing compound metabolic process;primary metabolic process;RNA metabolic process;RNA processing…	catalytic activity;endonuclease activity;endonuclease activity, active with either ribo- or deoxyribonucleic acids and producing 5'-phosphomonoesters;endoribonuclease activity;endoribonuclease activity, producing 5'-phosphomonoesters;hydrolase activity;hydrolase activity, acting on ester bonds;nuclease activity;ribonuclease activity;ribonuclease P activity;tRNA-specific ribonuclease activity	cell part;intracellular membrane-bounded organelle;intracellular organelle;intracellular organelle part;intracellular part;macromolecular complex;membrane-bounded organelle;multimeric ribonuclease P complex;nuclear part;nucleolar part;nucleolar ribonuclease P complex;nucleus;organelle;organelle part;ribonuclease P complex;ribonucleoprotein complex	28.0792	27.4679	23.6234	21.1291	26.5084	28.1592	22.7079	28.5778
B4DW13;Q6YP21;A0A0A0MRN7	Kynurenine--oxoglutarate transaminase 3	hCG_23341;CCBL2	1.41336	0.533993	5	5	167	167	514	33869	103260000	12	2-oxoglutarate metabolic process;amine catabolic process;amine metabolic process;aromatic amino acid family catabolic process;aromatic amino acid family metabolic process;aromatic compound catabolic process;biosynthetic process;carboxylic acid catabolic process;carboxylic acid metabolic process;catabolic process;cellular amine metabolic process;cellular amino acid catabolic process;cellular amino…	binding;carbon-sulfur lyase activity;catalytic activity;cofactor binding;cysteine-S-conjugate beta-lyase activity;kynurenine-glyoxylate transaminase activity;kynurenine-oxoglutarate transaminase activity;lyase activity;pyridoxal phosphate binding;transaminase activity;transferase activity;transferase activity, transferring nitrogenous groups;vitamin B6 binding;vitamin binding	cell part;cytoplasmic part;intracellular membrane-bounded organelle;intracellular organelle;intracellular part;membrane-bounded organelle;mitochondrion;organelle	23.3834	22.6096	22.0741	21.7743	23.8583	21.7507	22.7389	27.1469
A0A140VK94;P43487;C9JXG8;D3DX26;C9JJ34;B7Z6U1;B4DE76;C9JGV6	Ran-specific GTPase-activating protein	RANBP1	1.40963	1.27687	6	1	388	169	2331	20062	235070000	24	biological regulation;cellular process;cellular response to stimulus;establishment of localization;establishment of localization in cell;intracellular transport;regulation of biological process;regulation of catalytic activity;regulation of cellular process;regulation of metabolic process;regulation of molecular function;response to stimulus;signal transduction;transport;viral reproduction	binding;enzyme activator activity;enzyme binding;enzyme regulator activity;GDP-dissociation inhibitor activity;GTPase activator activity;GTPase binding;GTPase regulator activity;nucleoside-triphosphatase regulator activity;protein binding;Ran GTPase binding;Ras GTPase binding;small GTPase binding;small GTPase regulator activity	cell part;cytoplasm;envelope;intracellular membrane-bounded organelle;intracellular organelle;intracellular organelle part;intracellular part;membrane-bounded organelle;nuclear envelope;nuclear part;nucleus;organelle;organelle envelope;organelle part	25.5538	24.5252	23.8315	23.2901	26.0393	25.1939	25.1454	26.4606
B4DXT3;A8K7A2;Q53HL2	Borealin	CDCA8	1.40918	2.63133	1	1	66	66	16743	28993	17484000	4	biological regulation;cell cycle;cell cycle process;cell division;cellular component organization;cellular component organization at cellular level;cellular component organization or biogenesis;cellular component organization or biogenesis at cellular level;cellular process;cellular response to stimulus;chromosome organization;establishment of chromosome localization;establishment of localization…		cell part;chromocenter;chromosomal part;chromosome passenger complex;chromosome, centromeric region;cytoplasmic part;cytoskeletal part;cytosol;extracellular region part;intercellular bridge;intracellular membrane-bounded organelle;intracellular non-membrane-bounded organelle;intracellular organelle;intracellular organelle part;intracellular part;macromolecular complex;membrane-bounded organelle;m…	21.4586	21.7533	22.121	22.1668	22.9331	23.0046	23.2825	23.9163
Q2KHT3	Protein CLEC16A	CLEC16A	1.4077	0.551099	2	2	28	28	11771	2421	43430000	4	autophagy;catabolic process;cellular catabolic process;cellular metabolic process;cellular process;metabolic process		cell part;cytoplasmic part;endosomal part;endosome membrane;intracellular organelle part;intracellular part;lysosomal membrane;membrane;organelle membrane;organelle part;vacuolar membrane;vacuolar part	20.1927	19.8339	22.8108	24.2122	23.8271	24.3678	22.4531	22.0324
Q9H0X4;C9J1M4;C9J8V3;C9JJN3;C9JR71;C9JTF7;C9JP72;H7C2U8;C9J3Y6;C9IYB9;C9K0C5;B4DGG1	Protein ITFG3	ITFG3	1.40602	0.556961	2	2	54	54	59659	5812	8971500	5			cell part;cell surface;extracellular membrane-bounded organelle;extracellular organelle;extracellular region part;extracellular vesicular exosome;integral to membrane;intrinsic to membrane;membrane part;membrane-bounded organelle;membrane-bounded vesicle;organelle;vesicle	18.1627	19.0556	22.9313	22.1173	21.3272	22.0974	22.2398	22.2266
A0A024QZH6;Q9H7N4	Splicing factor, arginine/serine-rich 19	SR-A1;SCAF1	1.40181	0.586375	3	3	34	34	13926	49315	17608000	4	biosynthetic process;cellular biosynthetic process;cellular macromolecule biosynthetic process;cellular macromolecule metabolic process;cellular metabolic process;cellular nitrogen compound metabolic process;cellular process;macromolecule biosynthetic process;macromolecule metabolic process;metabolic process;mRNA metabolic process;mRNA processing;nitrogen compound metabolic process;nucleic acid m…	binding;nucleic acid binding;RNA binding	cell part;intracellular membrane-bounded organelle;intracellular organelle;intracellular part;membrane-bounded organelle;nucleus;organelle	19.8797	20.122	20.4148	20.4764	21.684	23.0138	23.3485	18.4539
Q9H8G2	Caspase activity and apoptosis inhibitor 1	CAAP1	1.39786	1.32134	1	1	44	44	38367	87837	10795000	7	apoptosis;cell death;cellular process;death;programmed cell death			19.2862	20.7883	20.8011	20.7672	20.6938	21.6817	22.6439	22.2147
Q96AQ6;B4DV94;B4E1J0;B4E0K4	Pre-B-cell leukemia transcription factor-interacting protein 1	PBXIP1	1.39654	1.41173	3	3	67	67	80642	6648	27295000	6	biological regulation;cell differentiation;cellular developmental process;cellular process;developmental process;multicellular organismal development;multicellular organismal process;negative regulation of biological process;negative regulation of biosynthetic process;negative regulation of cellular biosynthetic process;negative regulation of cellular macromolecule biosynthetic process;negative r…	protein binding transcription factor activity;transcription cofactor activity;transcription corepressor activity;transcription factor binding transcription factor activity	cell part;cytoplasmic part;cytoskeletal part;cytosol;intracellular membrane-bounded organelle;intracellular organelle;intracellular organelle part;intracellular part;macromolecular complex;membrane-bounded organelle;microtubule;nucleus;organelle;organelle part;protein complex	21.3028	21.2753	22.368	21.4742	23.0557	23.3313	23.9015	21.718
Q658N3;Q53F47;Q01658	Protein Dr1	DKFZp666G145;DR1	1.39651	2.17805	4	4	273	273	19443	60757	62635000	10	biological regulation;biosynthetic process;cellular biosynthetic process;cellular component organization;cellular component organization at cellular level;cellular component organization or biogenesis;cellular component organization or biogenesis at cellular level;cellular macromolecule biosynthetic process;cellular macromolecule metabolic process;cellular metabolic process;cellular nitrogen comp…	binding;DNA binding;nucleic acid binding;protein binding;protein binding transcription factor activity;sequence-specific DNA binding;TBP-class protein binding;transcription cofactor activity;transcription corepressor activity;transcription factor binding;transcription factor binding transcription factor activity	Ada2/Gcn5/Ada3 transcription activator complex;cell part;histone acetyltransferase complex;intracellular membrane-bounded organelle;intracellular organelle;intracellular organelle part;intracellular part;macromolecular complex;membrane-bounded organelle;nuclear part;nucleoplasm part;nucleus;organelle;organelle part;protein complex	22.5233	22.9593	23.0681	23.2185	23.6511	23.9869	24.9406	24.7765
F2Z3A9;F2Z2E5;F2Z2T3;F2Z3J7;E7EWW3;B7ZBD4;B7ZBD5;A8MXF6;A0AUY0;A0A0S2SW46;Q6IC14;Q9UNT1;Q9UBK7	Rab-like protein 2B;Rab-like protein 2A	RABL2B;RABL2A	1.39314	1.15773	1	1	282	282	42356	19284	3810900	2	biological regulation;cellular process;cellular response to stimulus;establishment of localization;establishment of localization in cell;establishment of protein localization;intracellular protein transport;intracellular signal transduction;intracellular transport;metabolic process;protein transport;Rab protein signal transduction;Ras protein signal transduction;regulation of biological process;r…	binding;catalytic activity;GTP binding;GTPase activity;guanyl nucleotide binding;guanyl ribonucleotide binding;hydrolase activity;hydrolase activity, acting on acid anhydrides;hydrolase activity, acting on acid anhydrides, in phosphorus-containing anhydrides;nucleoside-triphosphatase activity;nucleotide binding;purine nucleotide binding;purine ribonucleoside triphosphate binding;purine ribonucleo…	cell part;endomembrane system	20.2326	19.8252	19.9366	20.0867	19.6727	21.4483	22.5873	21.9453
Q53HN4;O00273;A0A024R4H5	DNA fragmentation factor subunit alpha	DFFA	1.39077	2.99379	7	7	284	284	36594	21167	109020000	22	apoptosis;biological regulation;catabolic process;cell death;cellular catabolic process;cellular component disassembly;cellular component disassembly at cellular level;cellular component disassembly involved in apoptosis;cellular component organization;cellular component organization at cellular level;cellular component organization or biogenesis;cellular component organization or biogenesis at c…		cell part;chromatin;chromosomal part;cytoplasm;cytoplasmic part;cytosol;intracellular;intracellular membrane-bounded organelle;intracellular organelle;intracellular organelle part;intracellular part;membrane-bounded organelle;nuclear chromatin;nuclear chromosome part;nuclear part;nucleoplasm;nucleus;organelle;organelle part	23.1148	23.642	23.6138	23.8871	24.5656	25.0284	25.3736	24.8531
B7ZMF1;B2RTQ2;Q9UPU7;B9A6J8	TBC1 domain family member 2B	TBC1D2B	1.39008	1.41509	3	3	39	39	96867	32416	9688800	3		enzyme activator activity;enzyme regulator activity;GTPase activator activity;GTPase regulator activity;nucleoside-triphosphatase regulator activity		20.5346	19.8441	20.9553	21.0551	21.2792	22.0432	21.3926	23.2345
V9GYB2;U3KPY3;A0A024R7K9;Q9BWG4	Single-stranded DNA-binding protein 4	SSBP4	1.38939	1.5376	1	1	239	239	70839	40041	5023600	3		binding;DNA binding;nucleic acid binding;single-stranded DNA binding;structure-specific DNA binding	cell part;intracellular membrane-bounded organelle;intracellular organelle;intracellular part;membrane-bounded organelle;nucleus;organelle	20.3864	20.6504	20.4323	20.4146	20.9248	21.184	22.3774	22.955
A8K6P5;A0A024RC06;Q13496;C9J2A2;B7Z499	Myotubularin	MTM1	1.38735	0.607587	2	2	5	5	69904	29812	29265000	5	anatomical structure homeostasis;anatomical structure morphogenesis;biological regulation;biosynthetic process;cell part morphogenesis;cellular biosynthetic process;cellular component morphogenesis;cellular component organization;cellular component organization at cellular level;cellular component organization or biogenesis;cellular component organization or biogenesis at cellular level;cellular …	binding;catalytic activity;hydrolase activity;hydrolase activity, acting on ester bonds;inositol or phosphatidylinositol phosphatase activity;intermediate filament binding;lipid binding;lipid phosphatase activity;phosphatase activity;phosphatidylinositol binding;phosphatidylinositol bisphosphate phosphatase activity;phosphatidylinositol monophosphate phosphatase activity;phosphatidylinositol-3,5-…	cell part;cell projection;contractile fiber part;cytoplasm;cytoplasmic part;cytosol;endosome;extracellular membrane-bounded organelle;extracellular organelle;extracellular region part;extracellular vesicular exosome;filopodium;I band;intracellular membrane-bounded organelle;intracellular organelle;intracellular part;late endosome;membrane;membrane-bounded organelle;membrane-bounded vesicle;organe…	18.4721	22.2303	22.748	22.852	22.4992	23.3104	23.5805	22.4619
P42166	Lamina-associated polypeptide 2, isoform alpha;Thymopoietin;Thymopentin	TMPO	1.38543	4.0955	30	17	533	354	75491	27764	2549100000	157	biological regulation;regulation of biological process;regulation of biosynthetic process;regulation of cellular biosynthetic process;regulation of cellular macromolecule biosynthetic process;regulation of cellular metabolic process;regulation of cellular process;regulation of gene expression;regulation of macromolecule biosynthetic process;regulation of macromolecule metabolic process;regulation…	binding;DNA binding;lamin binding;nucleic acid binding;protein binding	cell part;chromatin;chromosomal part;envelope;intracellular membrane-bounded organelle;intracellular organelle;intracellular organelle part;intracellular part;membrane;membrane-bounded organelle;nuclear envelope;nuclear inner membrane;nuclear membrane;nuclear part;nucleus;organelle;organelle envelope;organelle inner membrane;organelle membrane;organelle part	28.3243	28.0683	27.9767	27.9598	29.7895	29.2823	29.2851	29.5139
P16401	Histone H1.5	HIST1H1B	1.38482	1.95036	4	4	19	19	2258	11572	60710000	10	biological regulation;cellular component assembly;cellular component assembly at cellular level;cellular component organization;cellular component organization at cellular level;cellular component organization or biogenesis;cellular component organization or biogenesis at cellular level;cellular macromolecular complex assembly;cellular macromolecular complex subunit organization;cellular process;…	binding;chromatin binding;chromatin DNA binding;DNA binding;enzyme binding;histone deacetylase binding;nucleic acid binding;protein binding;structure-specific DNA binding	cell part;chromatin;chromosomal part;extracellular membrane-bounded organelle;extracellular organelle;extracellular region part;extracellular vesicular exosome;heterochromatin;intracellular organelle part;intracellular part;macromolecular complex;membrane-bounded organelle;membrane-bounded vesicle;nuclear chromatin;nuclear chromosome part;nuclear heterochromatin;nuclear part;nucleosome;organelle;…	21.9088	23.4423	22.6868	22.7591	23.6287	24.3873	23.7908	24.5296
J3KS54		FLII	1.3806	0.918082	1	1	34	34	78086	10399	55652000	11			cell part;cytoplasm;cytoplasmic part;cytoskeletal part;intracellular organelle part;intracellular part;microtubule organizing center;nuclear part;nucleoplasm;organelle part	23.3848	21.0632	21.6398	24.0375	23.1679	23.9959	23.8687	24.6152
F8VUY8;A8K6H9;A0A024R0W3;Q96QD8	Sodium-coupled neutral amino acid transporter 2	SLC38A2	1.36962	1.76267	2	2	523	523	10027	33374	116210000	16	amine transport;amino acid transmembrane transport;amino acid transport;biological regulation;carboxylic acid transport;cation transport;cell communication;cell-cell signaling;cellular process;establishment of localization;establishment of localization in cell;glutamate secretion;ion transport;metal ion transport;monovalent inorganic cation transport;neurotransmitter secretion;neurotransmitter tr…	active transmembrane transporter activity;amine transmembrane transporter activity;amino acid transmembrane transporter activity;carboxylic acid transmembrane transporter activity;organic acid transmembrane transporter activity;secondary active transmembrane transporter activity;substrate-specific transmembrane transporter activity;substrate-specific transporter activity;symporter activity;transm…	cell part;integral to membrane;integral to plasma membrane;intrinsic to membrane;intrinsic to plasma membrane;membrane;membrane part;plasma membrane;plasma membrane part	22.6757	23.6667	23.8031	24.3475	24.9704	24.3533	25.4543	25.1934
Q9H840	Gem-associated protein 7	GEMIN7	1.36889	2.2575	1	1	99	99	14536	20254	133630000	8	cellular component assembly;cellular component assembly at cellular level;cellular component organization;cellular component organization at cellular level;cellular component organization or biogenesis;cellular component organization or biogenesis at cellular level;cellular macromolecular complex assembly;cellular macromolecular complex subunit organization;cellular macromolecule metabolic proces…		cell part;cytoplasm;cytoplasmic part;cytosol;intracellular membrane-bounded organelle;intracellular organelle;intracellular organelle part;intracellular part;macromolecular complex;membrane-bounded organelle;nuclear body;nuclear part;nucleoplasm;nucleoplasm part;nucleus;organelle;organelle part;protein complex;SMN complex;SMN-Sm protein complex	23.7863	23.8681	24.4111	24.1984	24.5899	25.5632	25.6978	25.8884
A0A024R9D7;Q16698;E5RJD2;E5RJG7;Q7LDK6;E5RFV2	2,4-dienoyl-CoA reductase, mitochondrial	DECR1;DECR	1.36499	0.94506	4	4	158	158	36067	11831	71733000	10	carboxylic acid catabolic process;carboxylic acid metabolic process;catabolic process;cellular catabolic process;cellular component assembly;cellular component organization;cellular component organization or biogenesis;cellular ketone metabolic process;cellular lipid catabolic process;cellular lipid metabolic process;cellular metabolic process;cellular process;fatty acid beta-oxidation;fatty acid…	2,4-dienoyl-CoA reductase (NADPH) activity;binding;catalytic activity;coenzyme binding;cofactor binding;NADP binding;NADPH binding;nucleotide binding;oxidoreductase activity;oxidoreductase activity, acting on NADH or NADPH;oxidoreductase activity, acting on the CH-CH group of donors;oxidoreductase activity, acting on the CH-CH group of donors, NAD or NADP as acceptor	cell part;cytoplasm;cytoplasmic part;extracellular membrane-bounded organelle;extracellular organelle;extracellular region part;extracellular vesicular exosome;intracellular membrane-bounded organelle;intracellular organelle;intracellular organelle lumen;intracellular organelle part;intracellular part;membrane-bounded organelle;membrane-bounded vesicle;membrane-enclosed lumen;mitochondrial matrix…	23.1057	22.9616	22.0142	22.6844	23.7439	23.9545	22.5872	25.9403
Q9C0C9	E2/E3 hybrid ubiquitin-protein ligase UBE2O	UBE2O	1.36076	3.69013	6	6	62	62	14129	1405	95709000	13	biological regulation;cellular macromolecule metabolic process;cellular metabolic process;cellular process;cellular protein metabolic process;endosome transport;establishment of localization;establishment of localization in cell;intracellular transport;macromolecule metabolic process;macromolecule modification;metabolic process;positive regulation of biological process;positive regulation of BMP …	acid-amino acid ligase activity;adenyl nucleotide binding;adenyl ribonucleotide binding;ATP binding;binding;catalytic activity;enzyme binding;ligase activity;ligase activity, forming carbon-nitrogen bonds;nucleotide binding;protein binding;purine nucleotide binding;purine ribonucleoside triphosphate binding;purine ribonucleotide binding;ribonucleotide binding;small conjugating protein ligase acti…	cell part;cytoplasm;intracellular membrane-bounded organelle;intracellular organelle;intracellular organelle part;intracellular part;membrane-bounded organelle;nuclear part;nucleoplasm;nucleus;organelle;organelle part	23.3518	23.2333	23.0376	23.1755	24.9247	24.3321	24.7184	24.266
Q9NQT5;Q9NYS3	Exosome complex component RRP40	EXOSC3;PNAS-3	1.35646	0.686499	2	2	135	135	29572	93526	112950000	7	B cell activation;B cell activation involved in immune response;biological regulation;catabolic process;cell activation;cell activation involved in immune response;cellular catabolic process;cellular localization;cellular macromolecule catabolic process;cellular macromolecule localization;cellular macromolecule metabolic process;cellular metabolic process;cellular nitrogen compound metabolic proc…	3'-5' exonuclease activity;3'-5'-exoribonuclease activity;binding;catalytic activity;exonuclease activity;exonuclease activity, active with either ribo- or deoxyribonucleic acids and producing 5'-phosphomonoesters;exoribonuclease activity;exoribonuclease activity, producing 5'-phosphomonoesters;hydrolase activity;hydrolase activity, acting on ester bonds;nuclease activity;nucleic acid binding;rib…	cell part;chromatin;chromosomal part;cytoplasm;cytoplasmic exosome (RNase complex);cytoplasmic part;cytosol;exosome (RNase complex);intracellular membrane-bounded organelle;intracellular non-membrane-bounded organelle;intracellular organelle;intracellular organelle part;intracellular part;macromolecular complex;membrane-bounded organelle;non-membrane-bounded organelle;nuclear exosome (RNase compl…	20.9108	24.5166	24.6141	24.6847	24.3143	25.3994	25.2528	25.1856
A0A024R9N0;O43482	Protein Mis18-beta	OIP5	1.35549	0.975469	1	1	61	61	24691	14244	3967300	2	ATP-dependent chromatin remodeling;cell communication;cell cycle phase;cell cycle process;cell division;cellular component assembly;cellular component assembly at cellular level;cellular component organization;cellular component organization at cellular level;cellular component organization or biogenesis;cellular component organization or biogenesis at cellular level;cellular macromolecular compl…		Cajal body;cell part;chromatin;chromocenter;chromosomal part;chromosome, centromeric region;cytoplasm;intracellular membrane-bounded organelle;intracellular organelle;intracellular organelle part;intracellular part;membrane-bounded organelle;nuclear body;nuclear part;nucleoplasm;nucleoplasm part;nucleus;organelle;organelle part	19.4928	19.9649	20.7168	20.4262	19.7939	22.9271	21.3077	21.994
Q6N028;E7EQ67;H7BY63;A0A087X2A7;Q6P9G8;Q8NB25	Protein FAM184A	DKFZp686I01262;FAM184A	1.35263	1.20244	2	2	36	36	61467	19312	5498200	2			extracellular region part;extracellular space	20.2144	20.1677	20.7282	20.4903	20.1264	22.2576	21.8196	22.8075
A0A024RAV4;A0A024RAQ1;P16989;Q96GD7	Y-box-binding protein 3	CSDA;YBX3	1.35129	1.13058	2	2	168	168	31947	60889	9898300	5	3'-UTR-mediated mRNA stabilization;anatomical structure development;biological regulation;cellular hyperosmotic response;cellular macromolecule metabolic process;cellular metabolic process;cellular nitrogen compound metabolic process;cellular process;cellular response to abiotic stimulus;cellular response to chemical stimulus;cellular response to cytokine stimulus;cellular response to organic sub…	binding;DNA binding;double-stranded DNA binding;enzyme binding;GTPase binding;mRNA 3'-UTR binding;mRNA binding;nucleic acid binding;nucleic acid binding transcription factor activity;protein binding;protein binding transcription factor activity;Ras GTPase binding;regulatory region DNA binding;regulatory region nucleic acid binding;Rho GTPase binding;RNA binding;RNA polymerase II regulatory region…	cell junction;cell part;cell-cell junction;cytoplasm;cytoplasmic part;intracellular membrane-bounded organelle;intracellular organelle;intracellular part;macromolecular complex;membrane-bounded organelle;nucleus;occluding junction;organelle;perinuclear region of cytoplasm;polysome;ribonucleoprotein complex;tight junction	19.6542	22.2203	20.7591	20.5067	21.2729	22.7841	22.4553	22.033
A8K3S1;P46926;D6RAY7;B3KMV2;D6R9P4;D6RFF8	Glucosamine-6-phosphate isomerase;Glucosamine-6-phosphate isomerase 1	GNPDA1	1.35042	0.531694	4	4	163	163	32678	13204	35982000	11	alcohol catabolic process;alcohol metabolic process;amino sugar catabolic process;amino sugar metabolic process;carbohydrate catabolic process;carbohydrate metabolic process;catabolic process;cellular carbohydrate catabolic process;cellular carbohydrate metabolic process;cellular metabolic process;cellular process;fertilization;generation of precursor metabolites and energy;glucosamine catabolic …	catalytic activity;deaminase activity;glucosamine-6-phosphate deaminase activity;hydrolase activity;intramolecular oxidoreductase activity;intramolecular oxidoreductase activity, interconverting aldoses and ketoses;isomerase activity	cell part;cytoplasm;extracellular membrane-bounded organelle;extracellular organelle;extracellular region part;extracellular vesicular exosome;intracellular membrane-bounded organelle;intracellular organelle;intracellular part;membrane-bounded organelle;membrane-bounded vesicle;nucleus;organelle;vesicle	24.2059	19.3544	20.3418	21.1212	23.9612	21.4028	22.3252	22.7359
G3V2C9;P59768	Guanine nucleotide-binding protein subunit gamma;Guanine nucleotide-binding protein G(I)/G(S)/G(O) subunit gamma-2	GNG2	1.34841	3.01793	1	1	231	231	5904	3384	66023000	4	activation of adenylate cyclase activity;activation of adenylate cyclase activity by dopamine receptor signaling pathway;activation of adenylate cyclase activity by G-protein signaling pathway;biological regulation;blood coagulation;cAMP-mediated signaling;cell activation;cell communication;cell proliferation;cell surface receptor linked signaling pathway;cell-cell signaling;cellular metabolic pr…	binding;G-protein beta-subunit binding;molecular transducer activity;protein binding;signal transducer activity	cell part;extracellular membrane-bounded organelle;extracellular organelle;extracellular region part;extracellular vesicular exosome;extrinsic to internal side of plasma membrane;extrinsic to membrane;extrinsic to plasma membrane;heterotrimeric G-protein complex;intracellular part;macromolecular complex;membrane;membrane part;membrane-bounded organelle;membrane-bounded vesicle;organelle;plasma me…	22.7635	23.0854	23.1158	23.119	23.7711	24.5331	24.4511	24.7221
P55263;Q86U79;A0A140VJE0	Adenosine kinase	ADK	1.3472	1.07049	2	2	61	61	40545	41178	10195000	5	2'-deoxyribonucleotide biosynthetic process;2'-deoxyribonucleotide metabolic process;adenosine metabolic process;AMP biosynthetic process;AMP metabolic process;AMP salvage;biological regulation;biosynthetic process;cell proliferation;cellular aromatic compound metabolic process;cellular biosynthetic process;cellular metabolic compound salvage;cellular metabolic process;cellular nitrogen compound …	adenosine kinase activity;adenyl nucleotide binding;adenyl ribonucleotide binding;ATP binding;binding;catalytic activity;cation binding;ion binding;kinase activity;metal ion binding;nucleobase-containing compound kinase activity;nucleoside kinase activity;nucleotide binding;phosphotransferase activity, alcohol group as acceptor;purine nucleotide binding;purine ribonucleoside triphosphate binding;…	cell part;cytoplasm;cytoplasmic part;cytosol;intracellular organelle part;intracellular part;nuclear part;nucleoplasm;organelle part	21.151	21.3778	19.416	20.7022	21.1674	22.4955	23.1396	21.2333
B1AQP2;Q9UHV9	Prefoldin subunit 2	PFDN2	1.34408	2.5294	3	3	221	221	16648	32846	178200000	21	biological regulation;cellular macromolecule metabolic process;cellular metabolic process;cellular process;cellular protein metabolic process;'de novo' posttranslational protein folding;'de novo' protein folding;macromolecule metabolic process;metabolic process;positive regulation of biological process;positive regulation of cellular component organization;positive regulation of cellular process;…	binding;protein binding;protein binding involved in protein folding;unfolded protein binding	cell part;cytoplasm;cytoplasmic part;cytosolic part;extracellular membrane-bounded organelle;extracellular organelle;extracellular region part;extracellular vesicular exosome;intracellular membrane-bounded organelle;intracellular non-membrane-bounded organelle;intracellular organelle;intracellular organelle part;intracellular part;macromolecular complex;membrane-bounded organelle;membrane-bounded…	24.8313	24.2605	23.7148	24.6126	25.6346	26.0972	25.5793	25.4844
J3KTC1		MSI2	1.3422	1.12063	2	1	229	121	1546	50298	43696000	5		binding;nucleic acid binding;nucleotide binding		21.4852	22.8083	22.5884	22.3112	22.0556	24.3146	23.6976	24.4941
Q9Y6H1;Q5T1J5	Coiled-coil-helix-coiled-coil-helix domain-containing protein 2;Putative coiled-coil-helix-coiled-coil-helix domain-containing protein CHCHD2P9, mitochondrial	CHCHD2;CHCHD2P9	1.34127	0.828434	1	1	185	185	15512	6042	16996000	5	biological regulation;biosynthetic process;cellular biosynthetic process;cellular macromolecule biosynthetic process;cellular macromolecule metabolic process;cellular metabolic process;cellular nitrogen compound metabolic process;cellular process;macromolecule biosynthetic process;macromolecule metabolic process;metabolic process;nitrogen compound metabolic process;nucleic acid metabolic process;…	binding;DNA binding;nucleic acid binding;protein binding;sequence-specific DNA binding;transcription factor binding	cell part;cytoplasmic part;intracellular membrane-bounded organelle;intracellular organelle;intracellular part;membrane-bounded organelle;mitochondrion;nucleus;organelle	20.1555	21.1728	21.7329	21.1371	23.0428	20.9032	21.4711	24.1465
A0A024R856;H9KVB4;O15417	Trinucleotide repeat-containing gene 18 protein	hCG_96198;TNRC18	1.34063	1.51617	3	3	13	13	28731	22647	8349500	3	biological regulation;cellular component assembly;cellular component assembly at cellular level;cellular component organization;cellular component organization at cellular level;cellular component organization or biogenesis;cellular component organization or biogenesis at cellular level;cellular process;chromatin assembly;chromatin assembly or disassembly;chromatin modification;chromatin organiza…	binding;chromatin binding;DNA binding;nucleic acid binding;regulatory region DNA binding;regulatory region nucleic acid binding;sequence-specific DNA binding;transcription regulatory region DNA binding;transcription regulatory region sequence-specific DNA binding	cell part;chromatin;chromatin remodeling complex;chromatin silencing complex;chromosomal part;cytoplasm;cytoplasmic part;intracellular membrane-bounded organelle;intracellular organelle;intracellular organelle part;intracellular part;macromolecular complex;membrane;membrane-bounded organelle;mitochondrion;nuclear membrane;nuclear part;nucleoplasm;nucleus;organelle;organelle membrane;organelle par…	20.8106	19.6447	20.0874	21.6398	21.4827	21.8558	21.8112	22.3953
A0A1U9X8L5;A0A0G2JKZ1;A0A024RCT1;A2AB90;A0A0G2JH37;A0A0A0MSV9;O15533;Q6P1N7;C9JA35;B7Z4V3	Tapasin	TAPBP	1.3399	1.92556	5	5	121	121	47625	12488	180520000	18	amide transport;antigen processing and presentation;antigen processing and presentation of endogenous antigen;antigen processing and presentation of endogenous peptide antigen;antigen processing and presentation of endogenous peptide antigen via MHC class I;antigen processing and presentation of exogenous antigen;antigen processing and presentation of exogenous peptide antigen;antigen processing …	active transmembrane transporter activity;antigen binding;ATPase activity;ATPase activity, coupled;ATPase activity, coupled to movement of substances;ATPase activity, coupled to transmembrane movement of substances;binding;catalytic activity;hydrolase activity;hydrolase activity, acting on acid anhydrides;hydrolase activity, acting on acid anhydrides, catalyzing transmembrane movement of substanc…	cell part;cytoplasmic part;endoplasmic reticulum;endoplasmic reticulum membrane;endoplasmic reticulum part;Golgi apparatus part;Golgi membrane;integral to endoplasmic reticulum membrane;integral to lumenal side of endoplasmic reticulum membrane;integral to membrane;integral to organelle membrane;intracellular membrane-bounded organelle;intracellular organelle;intracellular organelle part;intracel…	23.7432	23.9372	24.6609	24.205	25.8432	25.9566	24.5539	25.5523
A0A024R7J7;Q9BW61	DET1- and DDB1-associated protein 1	DDA1	1.33778	2.05006	2	2	225	225	11835	54581	21283000	12				21.0527	21.5377	21.8442	21.38	21.9087	22.8047	23.2247	23.2275
Q86V81;E9PB61	THO complex subunit 4	ALYREF	1.33183	2.48484	5	5	30	30	26888	4774	120400000	18	biological regulation;biosynthetic process;cell differentiation;cellular biosynthetic process;cellular developmental process;cellular macromolecule biosynthetic process;cellular macromolecule metabolic process;cellular metabolic process;cellular nitrogen compound metabolic process;cellular process;cellular response to stimulus;cellular response to stress;developmental process;DNA metabolic proces…	binding;nucleic acid binding;nucleotide binding	catalytic step 2 spliceosome;cell part;cytoplasmic part;cytosol;extracellular membrane-bounded organelle;extracellular organelle;extracellular region part;extracellular vesicular exosome;intracellular membrane-bounded organelle;intracellular organelle;intracellular organelle part;intracellular part;macromolecular complex;membrane;membrane-bounded organelle;membrane-bounded vesicle;nuclear body;nu…	23.9319	23.8865	24.0026	22.8909	24.9596	24.8569	24.9138	25.3089
E9PGE5;Q9NUY8;B3KS68	TBC1 domain family member 23	TBC1D23	1.32696	0.58627	2	2	5	5	63286	28053	5936100	3	biological regulation;positive regulation of biological process;positive regulation of cytokine production;positive regulation of interleukin-6 production;positive regulation of multicellular organismal process;regulation of biological process;regulation of cytokine production;regulation of defense response;regulation of inflammatory response;regulation of interleukin-6 production;regulation of m…			18.3385	19.2713	21.2889	21.2714	19.6881	21.1609	21.2203	23.4087
Q9Y3Y2;A0A087X1B7;X6R700	Chromatin target of PRMT1 protein	CHTOP	1.32632	1.86838	3	3	145	145	26396	20633	6965900	3	biological regulation;biosynthetic process;cellular biosynthetic process;cellular macromolecule biosynthetic process;cellular macromolecule metabolic process;cellular metabolic process;cellular nitrogen compound metabolic process;cellular process;establishment of localization;establishment of localization in cell;establishment of RNA localization;intracellular transport;macromolecule biosynthetic…		cell part;intracellular membrane-bounded organelle;intracellular non-membrane-bounded organelle;intracellular organelle;intracellular organelle part;intracellular part;macromolecular complex;membrane-bounded organelle;non-membrane-bounded organelle;nuclear body;nuclear part;nuclear speck;nucleolus;nucleoplasm;nucleoplasm part;organelle;organelle part;protein complex;transcription export complex	19.301	19.6999	19.8314	20.0559	20.3525	20.5495	21.7453	21.5462
B7Z5N5;Q53XR6;Q15796	Mothers against decapentaplegic homolog;Mothers against decapentaplegic homolog 2	SMAD2	1.32348	2.39892	5	2	151	79	48669	13494	127020000	19	activin receptor signaling pathway;anatomical structure development;anatomical structure formation involved in morphogenesis;anatomical structure morphogenesis;anterior/posterior pattern specification;axis specification;biological regulation;biosynthetic process;cell fate commitment;cell surface receptor linked signaling pathway;cellular biosynthetic process;cellular component assembly;cellular c…	activating transcription factor binding;binding;cation binding;chromatin binding;core promoter proximal region DNA binding;core promoter proximal region sequence-specific DNA binding;co-SMAD binding;cytokine receptor binding;DNA binding;double-stranded DNA binding;enhancer binding;enzyme binding;ion binding;I-SMAD binding;metal ion binding;molecular transducer activity;nucleic acid binding;nuclei…	activin responsive factor complex;cell part;chromatin;chromosomal part;cytoplasm;cytoplasmic part;cytosol;intracellular membrane-bounded organelle;intracellular organelle;intracellular organelle part;intracellular part;macromolecular complex;membrane-bounded organelle;nuclear chromatin;nuclear chromosome part;nuclear part;nucleoplasm;nucleoplasm part;nucleus;organelle;organelle part;protein compl…	24.1404	23.4338	23.8408	23.558	25.6975	24.5307	24.8797	25.1589
H0YK61;A0A024R9N3;Q5J8M3;S4R329;H0YNK0;H0YNK8;A0A0S2Z598;H0YLP8	ER membrane protein complex subunit 4	EMC4;TMEM85	1.32058	1.80177	6	6	782	782	83403	23554	217810000	20	apoptosis;cell death;cellular process;death;programmed cell death		cell part;ER membrane protein complex;integral to membrane;intrinsic to membrane;macromolecular complex;membrane part;protein complex	24.3009	24.6222	24.8275	25.1989	25.0973	25.9863	26.5841	26.5641
B3KWQ9			1.31895	3.78977	15	1	314	22	63569	88095	587370000	76				26.0802	26.1336	25.7957	25.9585	27.211	27.3956	27.6472	26.99
A0A024R883;O75348	V-type proton ATPase subunit G 1	ATP6V1G1	1.31859	1.95274	6	6	449	449	13757	68254	168630000	25	biological regulation;cation homeostasis;cation transport;cell surface receptor linked signaling pathway;cellular cation homeostasis;cellular chemical homeostasis;cellular component organization;cellular component organization at cellular level;cellular component organization or biogenesis;cellular component organization or biogenesis at cellular level;cellular homeostasis;cellular ion homeostasi…	active transmembrane transporter activity;ATPase activity;ATPase activity, coupled;ATPase activity, coupled to movement of substances;ATPase activity, coupled to transmembrane movement of ions;ATPase activity, coupled to transmembrane movement of ions, phosphorylative mechanism;ATPase activity, coupled to transmembrane movement of substances;ATPase binding;binding;catalytic activity;cation transm…	cell part;cytoplasmic membrane-bounded vesicle;cytoplasmic part;cytoplasmic vesicle;cytoplasmic vesicle part;cytosol;extracellular membrane-bounded organelle;extracellular organelle;extracellular region part;extracellular vesicular exosome;integral to membrane;integral to organelle membrane;integral to synaptic vesicle membrane;intracellular membrane-bounded organelle;intracellular organelle;intr…	24.0632	24.689	23.6797	24.6328	24.9867	25.6308	26.2996	25.4219
Q9Y5B0;A0A0A0MR03;K7EJD2;A0A0J9YWB6	RNA polymerase II subunit A C-terminal domain phosphatase	CTDP1	1.31793	1.29417	9	9	163	163	1044	27621	57135000	18	biological regulation;biosynthetic process;cell cycle process;cell division;cellular biosynthetic process;cellular macromolecule biosynthetic process;cellular macromolecule metabolic process;cellular metabolic process;cellular nitrogen compound metabolic process;cellular process;cellular protein metabolic process;dephosphorylation;exit from mitosis;gene expression;macromolecule biosynthetic proce…	catalytic activity;CTD phosphatase activity;DNA-directed RNA polymerase activity;hydrolase activity;hydrolase activity, acting on ester bonds;nucleotidyltransferase activity;phosphatase activity;phosphoprotein phosphatase activity;phosphoric ester hydrolase activity;protein serine/threonine phosphatase activity;RNA polymerase activity;transferase activity;transferase activity, transferring phosph…	actin cytoskeleton;cell part;centrosome;cytoplasm;cytoplasmic part;cytoskeletal part;cytoskeleton;intracellular membrane-bounded organelle;intracellular non-membrane-bounded organelle;intracellular organelle;intracellular organelle part;intracellular part;membrane-bounded organelle;microtubule organizing center;midbody;non-membrane-bounded organelle;nuclear part;nucleoplasm;nucleus;organelle;orga…	23.4333	22.9168	22.0016	21.4968	24.416	23.9088	23.9014	22.894
Q5MD87;W6JM27;Q95HA7;Q8MGY9;Q8HWQ3;Q861D6;Q861D5;Q861D4;Q861D3;Q861D2;Q861D1;Q861D0;Q861C9;Q861C8;Q861C7;Q7YP17;Q7YNX2;Q70HJ6;Q709M5;Q6ZXT6;Q5QR47;Q5F311;F8T958;C9E311;B9VWB1;B6VAW4;B4XKD1;A5LIC1;A0A128DYW3;Q9MY26;Q7JGS1;Q7JGS0;Q7JGR9;Q8MHM7;Q5QR60;Q5QR59;Q5QR58;Q5QR57;Q5QR56;Q5QR55;Q5QR54;Q5QR53;Q5QR52;Q5QR51;Q5QR50;Q5QR49;Q5QR48;Q5QR46;Q5QR45;Q5QR44;Q5QR43;Q5QR41;Q5QR40;Q5QR39;Q5QR38;Q5QR37;Q5Q…	HLA class I histocompatibility antigen, B-38 alpha chain;HLA class I histocompatibility antigen, B-59 alpha chain;HLA class I histocompatibility antigen, B-67 alpha chain;HLA class I histocompatibility antigen, B-82 alpha chain;HLA class I histocompatibility antigen, B-40 alpha chain;HLA class I histocompatibility antigen, B-35 alpha chain;HLA class I histocompatibility antigen, B-78 alpha chain;…	HLA-B;HLA-B*;HLA-A;HLA;HLA B;B*56;HLA-B*27;HLA-B41;B-1510;B-3501;HLA-C;HLA-Bw62.4;HLA-Bw62.1;HLA-Bw62.5;HLA-Bw62.3;HEL-S-83;HLA-B57;DKFZp686N10220;HLA-B*1513;HLA-B35;HLA-B*3512	1.31412	1.39852	1	0	73	0	31705	74991	7324400	2	antigen processing and presentation;antigen processing and presentation of endogenous antigen;antigen processing and presentation of endogenous peptide antigen;antigen processing and presentation of endogenous peptide antigen via MHC class I;antigen processing and presentation of endogenous peptide antigen via MHC class I via ER pathway;antigen processing and presentation of endogenous peptide an…	antigen binding;binding;chaperone binding;peptide antigen binding;peptide binding;protein binding;receptor binding;TAP binding	cell part;cell surface;coated vesicle membrane;cytoplasmic part;cytoplasmic vesicle membrane;cytoplasmic vesicle part;early endosome membrane;endocytic vesicle membrane;endoplasmic reticulum;endoplasmic reticulum part;endosomal part;endosome membrane;ER to Golgi transport vesicle membrane;extracellular membrane-bounded organelle;extracellular organelle;extracellular region part;extracellular vesi…	20.624	20.82	20.5282	22.2033	21.9121	23.2683	21.9487	22.3028
Q68CR8;Q5T949;Q5T948;A6PVN5;B4DZF8;B4DLX5;Q15257	Serine/threonine-protein phosphatase 2A activator	DKFZp781M17165;PPP2R4	1.3137	0.618079	3	3	356	356	11738	10826	119560000	18	biological regulation;cell cycle process;cellular component organization;cellular component organization at cellular level;cellular component organization or biogenesis;cellular component organization or biogenesis at cellular level;cellular macromolecule metabolic process;cellular metabolic process;cellular process;cellular protein metabolic process;cytoskeleton organization;macromolecule metabo…	adenyl nucleotide binding;adenyl ribonucleotide binding;ATP binding;binding;catalytic activity;cis-trans isomerase activity;enzyme activator activity;enzyme binding;enzyme regulator activity;identical protein binding;isomerase activity;nucleotide binding;peptidyl-prolyl cis-trans isomerase activity;phosphatase activator activity;phosphatase binding;phosphatase regulator activity;protein binding;p…	calcium channel complex;cation channel complex;cell part;cytoplasm;extracellular membrane-bounded organelle;extracellular organelle;extracellular region part;extracellular vesicular exosome;intracellular membrane-bounded organelle;intracellular organelle;intracellular organelle part;intracellular part;ion channel complex;macromolecular complex;membrane part;membrane-bounded organelle;membrane-bou…	23.5907	23.394	23.1176	22.6616	23.9299	23.0604	23.6048	27.4237
P16403	Histone H1.2	HIST1H1C	1.31079	0.915831	3	3	99	99	21364	12013	102550000	13	cellular component assembly;cellular component assembly at cellular level;cellular component organization;cellular component organization at cellular level;cellular component organization or biogenesis;cellular component organization or biogenesis at cellular level;cellular macromolecular complex assembly;cellular macromolecular complex subunit organization;cellular process;chromatin assembly;chr…	binding;chromatin binding;chromatin DNA binding;DNA binding;nucleic acid binding;structure-specific DNA binding	cell part;chromatin;chromosomal part;euchromatin;intracellular membrane-bounded organelle;intracellular organelle;intracellular organelle part;intracellular part;macromolecular complex;membrane-bounded organelle;nuclear chromatin;nuclear chromosome part;nuclear euchromatin;nuclear part;nucleosome;nucleus;organelle;organelle part;protein-DNA complex	22.9794	23.5663	23.9906	22.4881	24.7012	23.428	23.8006	26.3377
A0A1B0GVY6;B4DWS6;B3KQJ0;Q53GQ0;E9PI21;A0A1B0GV93;D3DR22	Very-long-chain 3-oxoacyl-CoA reductase	HSD17B12	1.30903	2.5633	2	2	135	135	19481	26121	52785000	5	acyl-CoA biosynthetic process;acyl-CoA metabolic process;acylglycerol biosynthetic process;acylglycerol metabolic process;biological regulation;biosynthetic process;carboxylic acid biosynthetic process;carboxylic acid metabolic process;cellular biosynthetic process;cellular component organization;cellular component organization at cellular level;cellular component organization or biogenesis;cellu…	binding;carbohydrate binding;catalytic activity;estradiol 17-beta-dehydrogenase activity;glycosaminoglycan binding;heparin binding;oxidoreductase activity;oxidoreductase activity, acting on CH-OH group of donors;oxidoreductase activity, acting on the CH-OH group of donors, NAD or NADP as acceptor;pattern binding;polysaccharide binding;steroid dehydrogenase activity;steroid dehydrogenase activity,…	cell part;cytoplasmic part;endoplasmic reticulum membrane;endoplasmic reticulum part;extracellular matrix;extracellular region part;integral to membrane;intracellular organelle part;intracellular part;intrinsic to membrane;membrane;membrane part;organelle membrane;organelle part	22.481	22.8164	22.7167	23.0166	23.3789	24.1354	24.5197	24.2329
M0QZM1		HNRNPM	1.30597	0.314042	1	1	37	37	39933	75457	308880000	12	cellular macromolecule metabolic process;cellular metabolic process;cellular nitrogen compound metabolic process;cellular process;macromolecule metabolic process;metabolic process;mRNA metabolic process;mRNA processing;nitrogen compound metabolic process;nuclear mRNA splicing, via spliceosome;nucleic acid metabolic process;nucleobase-containing compound metabolic process;primary metabolic process…	binding;nucleic acid binding;nucleotide binding;RNA binding		25.6427	26.0579	19.4149	26.6668	25.7298	26.5962	26.2604	24.42
F8W8Z9;Q8N4H5	Mitochondrial import receptor subunit TOM5 homolog	TOMM5	1.30493	0.88826	2	2	153	153	10976	17736	8886800	3	cellular macromolecule metabolic process;cellular metabolic process;cellular process;cellular protein metabolic process;establishment of localization;establishment of localization in cell;establishment of protein localization;establishment of protein localization in mitochondrion;establishment of protein localization to organelle;intracellular protein transport;intracellular transport;macromolecu…		cell part;cytoplasmic part;integral to membrane;intracellular membrane-bounded organelle;intracellular organelle;intracellular organelle part;intracellular part;intrinsic to membrane;macromolecular complex;membrane part;membrane-bounded organelle;mitochondrial membrane part;mitochondrial outer membrane translocase complex;mitochondrial part;mitochondrion;organelle;organelle part;protein complex	19.1474	20.4416	22.0184	21.6974	22.3343	22.6052	21.0947	22.4903
Q5RKV6	Exosome complex component MTR3	EXOSC6	1.30488	2.39234	6	6	265	265	28235	34936	141280000	23	B cell activation;B cell activation involved in immune response;catabolic process;cell activation;cell activation involved in immune response;cellular catabolic process;cellular macromolecule catabolic process;cellular macromolecule metabolic process;cellular metabolic process;cellular nitrogen compound metabolic process;cellular process;DNA deamination;DNA metabolic process;DNA modification;DNA …		cell part;cytoplasmic exosome (RNase complex);cytoplasmic part;cytosol;exosome (RNase complex);intracellular non-membrane-bounded organelle;intracellular organelle;intracellular organelle part;intracellular part;macromolecular complex;non-membrane-bounded organelle;nuclear exosome (RNase complex);nuclear part;nucleolus;organelle;organelle part;protein complex	23.5404	24.1922	24.0772	24.3949	24.6904	25.4841	25.6206	25.629
A8K7A4			1.30486	0.943865	1	1	56	56	36429	66347	93100000	15	amine biosynthetic process;amine metabolic process;biosynthetic process;carboxylic acid biosynthetic process;carboxylic acid metabolic process;cellular amine metabolic process;cellular amino acid biosynthetic process;cellular amino acid metabolic process;cellular biosynthetic process;cellular ketone metabolic process;cellular metabolic process;cellular modified amino acid biosynthetic process;cel…	catalytic activity;enzyme regulator activity;methionine adenosyltransferase regulator activity;transferase activity	cell part;intracellular part;macromolecular complex;methionine adenosyltransferase complex;protein complex	24.6531	22.0575	22.4196	23.1059	24.8211	23.9547	23.435	25.2446
A0A0A0MRJ9;Q7Z6I6;A0A0A0MRJ8	Rho GTPase-activating protein 30	ARHGAP30	1.30007	2.02211	6	6	104	104	95527	23836	53701000	18	biological regulation;cellular process;cellular response to stimulus;intracellular signal transduction;regulation of biological process;regulation of cellular process;regulation of response to stimulus;regulation of signal transduction;regulation of signaling;regulation of small GTPase mediated signal transduction;response to stimulus;signal transduction;small GTPase mediated signal transduction	enzyme activator activity;enzyme regulator activity;GTPase activator activity;GTPase regulator activity;nucleoside-triphosphatase regulator activity	cell part;cytoplasmic membrane-bounded vesicle;cytoplasmic part;cytoplasmic vesicle;cytosol;intracellular;intracellular membrane-bounded organelle;intracellular organelle;intracellular part;membrane-bounded organelle;membrane-bounded vesicle;organelle;vesicle	22.6058	22.9214	21.8358	22.1866	24.4292	23.5648	23.3166	23.4394
B3KTD5;B4E240;Q92575	UBX domain-containing protein 4	UBXN4	1.29846	3.95512	5	5	266	266	31277	19032	93305000	19	catabolic process;cellular catabolic process;cellular macromolecule catabolic process;cellular macromolecule metabolic process;cellular metabolic process;cellular process;ER-associated protein catabolic process;macromolecule catabolic process;macromolecule metabolic process;metabolic process;modification-dependent macromolecule catabolic process;modification-dependent protein catabolic process;pr…		cell part;cytoplasm;cytoplasmic part;endoplasmic reticulum;endoplasmic reticulum membrane;endoplasmic reticulum part;envelope;intracellular membrane-bounded organelle;intracellular organelle;intracellular organelle part;intracellular part;membrane;membrane part;membrane-bounded organelle;nuclear envelope;nuclear part;organelle;organelle envelope;organelle membrane;organelle part	23.3351	23.3915	23.7316	23.4289	24.781	25.0509	24.4855	24.7635
Q9Y4A0	Jerky protein homolog-like	JRKL	1.29836	0.79334	2	2	48	48	59911	55191	8789000	5	anatomical structure development;central nervous system development;developmental process;system development	binding;DNA binding;nucleic acid binding	cell part;intracellular membrane-bounded organelle;intracellular organelle;intracellular part;membrane-bounded organelle;nucleus;organelle	19.8287	20.1373	21.8359	21.9781	20.8358	23.5712	22.7332	21.8334
O95721	Synaptosomal-associated protein 29	SNAP29	1.29836	1.34436	3	3	143	143	2897	68472	16856000	3	autophagic vacuole fusion;cellular component assembly;cellular component assembly at cellular level;cellular component organization;cellular component organization at cellular level;cellular component organization or biogenesis;cellular component organization or biogenesis at cellular level;cellular macromolecular complex assembly;cellular macromolecular complex subunit organization;cellular memb…	binding;protein binding;SNAP receptor activity;SNARE binding;syntaxin binding	cell junction;cell part;cell projection;centrosome;cytoplasm;cytoplasmic part;cytoskeletal part;intracellular non-membrane-bounded organelle;intracellular organelle;intracellular organelle part;intracellular part;macromolecular complex;membrane;membrane part;microtubule organizing center;neuron projection;non-membrane-bounded organelle;organelle;organelle part;plasma membrane;protein complex;SNAR…	20.5517	21.0352	22.8469	21.2038	22.5677	22.942	22.4151	22.9063
A0A024R0Q0;Q9H0W8;M0R2N0;M0QZC7;M0QYR7	Protein SMG9	FLJ12886;SMG9	1.29549	3.68887	7	7	233	233	5765	23752	55764000	13	catabolic process;cellular catabolic process;cellular macromolecule catabolic process;cellular macromolecule metabolic process;cellular metabolic process;cellular nitrogen compound metabolic process;cellular process;gene expression;macromolecule catabolic process;macromolecule metabolic process;metabolic process;mRNA catabolic process;mRNA metabolic process;nitrogen compound metabolic process;nuc…	binding;identical protein binding;protein binding	cell part;cytoplasmic part;cytosol;intracellular;intracellular part	22.535	22.2598	22.3473	22.6194	24.0351	23.3611	23.7844	23.763
Q92945;A0A087WTP3;B4DV73	Far upstream element-binding protein 2	KHSRP	1.29442	2.81774	36	32	646	61	73114	32331	5352400000	337	biological regulation;biosynthetic process;catabolic process;cellular biosynthetic process;cellular catabolic process;cellular macromolecule biosynthetic process;cellular macromolecule catabolic process;cellular macromolecule metabolic process;cellular metabolic process;cellular nitrogen compound metabolic process;cellular process;establishment of localization;establishment of RNA localization;ge…	binding;DNA binding;mRNA binding;nucleic acid binding;RNA binding	cell part;cytoplasmic part;cytosol;intracellular non-membrane-bounded organelle;intracellular organelle;intracellular organelle part;intracellular part;macromolecular complex;membrane;non-membrane-bounded organelle;nuclear part;nucleoplasm;organelle;organelle part;ribonucleoprotein complex;RNA granule;stress granule	29.2749	29.4324	29.4272	28.9013	31.1527	30.3513	30.365	30.3444
K7EIX2;Q6AI08;K7EKW7;K7ESP5;K7ELR8;Q0VD96;A0A087WXZ7	HEAT repeat-containing protein 6	HEATR6	1.2935	1.19732	2	2	24	24	11659	24664	30196000	4				21.4656	22.034	21.7935	20.728	22.923	22.3228	24.1185	21.8307
E7ESG2;Q1RMC5;Q9HAW4;Q05D30	Claspin	CLSPN	1.29167	0.725858	3	3	33	33	14531	6444	10163000	6	activation of protein kinase activity;apoptosis;biological regulation;biosynthetic process;cell cycle checkpoint;cell death;cellular biosynthetic process;cellular component disassembly;cellular component disassembly at cellular level;cellular component disassembly involved in apoptosis;cellular component organization;cellular component organization at cellular level;cellular component organizatio…	anaphase-promoting complex binding;binding;DNA binding;nucleic acid binding;protein binding;protein complex binding	cell part;intracellular organelle part;intracellular part;nuclear part;nucleoplasm;organelle part	21.7262	19.2718	22.3326	19.4957	20.8188	22.396	22.4643	22.3138
Q8N108	Mesoderm induction early response protein 1	MIER1	1.28987	3.39759	4	4	86	86	57983	11178	55215000	11	biological regulation;biosynthetic process;cellular biosynthetic process;cellular macromolecule biosynthetic process;cellular macromolecule metabolic process;cellular metabolic process;cellular nitrogen compound metabolic process;cellular process;cellular response to stimulus;macromolecule biosynthetic process;macromolecule metabolic process;metabolic process;nitrogen compound metabolic process;n…	binding;chromatin binding;DNA binding;molecular transducer activity;nucleic acid binding;signal transducer activity	cell part;cytoplasm;intracellular organelle part;intracellular part;macromolecular complex;nuclear part;nucleoplasm;nucleoplasm part;organelle part;protein complex;transcriptional repressor complex	22.9296	22.5745	22.654	23.0092	24.0496	23.7203	24.4482	24.1088
A0A0B4J211;A0A024R9G7;Q6PL18	ATPase family AAA domain-containing protein 2	ATAD2	1.28971	1.551	1	1	18	18	80608	18125	3757400	1	biological regulation;biosynthetic process;cellular biosynthetic process;cellular macromolecule biosynthetic process;cellular macromolecule metabolic process;cellular metabolic process;cellular nitrogen compound metabolic process;cellular process;macromolecule biosynthetic process;macromolecule metabolic process;metabolic process;negative regulation of biological process;negative regulation of ce…	adenyl nucleotide binding;adenyl ribonucleotide binding;ATP binding;ATPase activity;binding;catalytic activity;chromatin binding;histone binding;hydrolase activity;hydrolase activity, acting on acid anhydrides;hydrolase activity, acting on acid anhydrides, in phosphorus-containing anhydrides;nucleoside-triphosphatase activity;nucleotide binding;protein binding;purine nucleotide binding;purine rib…	cell part;extracellular membrane-bounded organelle;extracellular organelle;extracellular region part;extracellular vesicular exosome;intracellular organelle part;intracellular part;membrane-bounded organelle;membrane-bounded vesicle;nuclear part;nucleoplasm;organelle;organelle part;vesicle	20.053	20.122	19.7956	19.6326	19.9686	21.7476	21.8619	21.184
C9JE12;C9JCW7;A0A090N8Q3;Q9BVT8	Transmembrane and ubiquitin-like domain-containing protein 1	TMUB1;C7orf21	1.28969	2.48874	3	3	336	336	1612	93922	86922000	8			cell part;cytoplasm;integral to membrane;intracellular organelle part;intracellular part;intrinsic to membrane;membrane part;nuclear part;nucleoplasm;organelle part	23.4788	23.2172	23.4696	23.631	24.392	25.2398	25.1218	24.2018
A8K883;Q9BTT6	Leucine-rich repeat-containing protein 1	LRRC1	1.28965	2.22673	1	1	27	27	59227	41342	21167000	5			cell part;cytoplasm;intracellular part;membrane	21.1762	21.134	21.6744	21.6008	21.9882	22.8715	23.3051	22.5792
Q96HR8	H/ACA ribonucleoprotein complex non-core subunit NAF1	NAF1	1.28775	0.791784	2	2	51	51	53716	47402	49224000	4	cellular component biogenesis;cellular component biogenesis at cellular level;cellular component organization or biogenesis;cellular component organization or biogenesis at cellular level;cellular macromolecule metabolic process;cellular metabolic process;cellular nitrogen compound metabolic process;cellular process;macromolecule metabolic process;macromolecule modification;metabolic process;ncRN…	binding;nucleic acid binding;RNA binding	cell part;cytoplasm;intracellular membrane-bounded organelle;intracellular organelle;intracellular part;macromolecular complex;membrane-bounded organelle;nucleus;organelle;ribonucleoprotein complex;small nucleolar ribonucleoprotein complex	21.4307	23.6407	21.731	23.6655	23.4539	24.0061	22.8157	25.3433
J3KSH8;J3KT51;Q9UK76	Hematological and neurological expressed 1 protein;Hematological and neurological expressed 1 protein, N-terminally processed	HN1	1.2871	2.09632	1	1	161	161	95162	33886	5270000	2	developmental process		cell part;intracellular membrane-bounded organelle;intracellular organelle;intracellular part;membrane-bounded organelle;nucleus;organelle	19.3468	20.1	19.7726	19.5528	20.6668	20.6218	20.7938	21.8382
V9HWD1;B3KNK0;Q4W5G0	Tigger transposable element-derived protein 2	HEL106;TIGD2	1.28664	1.80787	2	2	57	57	59623	74976	9661100	4		binding;DNA binding;nucleic acid binding	cell part;intracellular membrane-bounded organelle;intracellular organelle;intracellular part;membrane-bounded organelle;nucleus;organelle	20.2101	20.4594	20.366	19.9111	22.4044	21.1174	20.7608	21.8107
B7Z4Q0;B7Z6L2;A0A024R4U0;Q9NP61;H0Y6A0	ADP-ribosylation factor GTPase-activating protein 3	ARFGAP3	1.28638	2.85312	12	12	279	279	48969	33442	227500000	47	biological regulation;cellular process;establishment of localization;establishment of localization in cell;establishment of protein localization;intracellular protein transport;intracellular transport;positive regulation of catalytic activity;positive regulation of GTPase activity;positive regulation of hydrolase activity;positive regulation of molecular function;protein secretion;protein transpo…	binding;cation binding;enzyme activator activity;enzyme regulator activity;GTPase activator activity;GTPase regulator activity;ion binding;metal ion binding;nucleoside-triphosphatase regulator activity;protein transporter activity;substrate-specific transporter activity;transition metal ion binding;transporter activity;zinc ion binding	cell part;cytoplasm;cytoplasmic part;cytosol;Golgi apparatus;Golgi apparatus part;Golgi membrane;intracellular membrane-bounded organelle;intracellular organelle;intracellular organelle part;intracellular part;membrane;membrane-bounded organelle;organelle;organelle membrane;organelle part	24.2131	24.6976	24.9657	24.9449	25.6027	26.1762	26.2717	25.9162
Q8WY22	BRI3-binding protein	BRI3BP	1.28602	2.42111	3	3	12	12	27835	87648	56745000	12			cell part;cytoplasmic part;integral to membrane;intracellular membrane-bounded organelle;intracellular organelle;intracellular organelle part;intracellular part;intrinsic to membrane;membrane;membrane part;membrane-bounded organelle;mitochondrial membrane;mitochondrial outer membrane;mitochondrial part;mitochondrion;organelle;organelle membrane;organelle outer membrane;organelle part;outer membra…	22.3354	22.5732	22.8481	23.2068	23.4116	24.1927	24.3518	24.1514
A9QQ21;A9QQ16;A9QQ15;A9QQ13;A9QQ12;Q7Z3N4;C4AMC7;Q6VEQ5;A8K0Z3;B4DTD2;B4DJQ2;B4DG24;Q86WN0;Q9NSV7;A9QQ19;A9QQ20;A9QQ18;A9QQ17;A9QQ14;A9QQ23;A9QQ22;Q9NQA3;A8MWX3	Putative WAS protein family homolog 3;WAS protein family homolog 2;WAS protein family homolog 1;WAS protein family homolog 6;Putative WAS protein family homolog 4	WASH;DKFZp686C24272;WASH3P;WASH2P;WASH1;DKFZp434K1323;WASH6P;WASH4P	1.28461	1.63612	2	2	86	86	43645	10629	20668000	8	actin cytoskeleton organization;actin filament organization;actin filament-based process;actin nucleation;Arp2/3 complex-mediated actin nucleation;biological regulation;cellular component disassembly;cellular component disassembly at cellular level;cellular component organization;cellular component organization at cellular level;cellular component organization or biogenesis;cellular component org…	alpha-tubulin binding;binding;cytoskeletal protein binding;enzyme binding;protein binding;tubulin binding;ubiquitin protein ligase binding	autophagic vacuole;cell part;cell projection;centriole;cytoplasmic part;cytoplasmic vesicle;cytoskeletal part;early endosome;early endosome membrane;endosomal part;endosome;endosome membrane;filopodium;intracellular membrane-bounded organelle;intracellular non-membrane-bounded organelle;intracellular organelle;intracellular organelle part;intracellular part;invadopodium;lamellipodium;late endosom…	20.7201	21.4799	21.6093	21.7128	21.6747	22.6528	22.9867	23.3465
V9HW45;Q53FP0;Q9NVS9	Pyridoxine-5-phosphate oxidase	HEL-S-302;PNPO	1.28323	2.94226	2	2	10	10	29988	14173	8940400	2	biological regulation;biosynthetic process;cellular biosynthetic process;cellular metabolic process;cellular process;coenzyme biosynthetic process;coenzyme metabolic process;cofactor biosynthetic process;cofactor metabolic process;heterocycle metabolic process;metabolic process;positive regulation of defense response to virus by host;pyridoxal phosphate biosynthetic process;pyridoxal phosphate me…	binding;catalytic activity;coenzyme binding;cofactor binding;FMN binding;nucleotide binding;oxidoreductase activity;oxidoreductase activity, acting on the CH-NH2 group of donors;oxidoreductase activity, acting on the CH-NH2 group of donors, oxygen as acceptor;pyridoxamine-phosphate oxidase activity	cell part;cytoplasm;cytoplasmic part;cytosol;extracellular membrane-bounded organelle;extracellular organelle;extracellular region part;extracellular vesicular exosome;intracellular organelle part;intracellular part;membrane-bounded organelle;membrane-bounded vesicle;nuclear part;nucleoplasm;organelle;organelle part;vesicle	20.7972	20.891	20.8357	20.7976	21.5426	22.195	22.6106	22.1062
Q96T58	Msx2-interacting protein	SPEN	1.27904	1.27824	3	3	14	14	40224	92127	7975500	4	biological regulation;cell surface receptor linked signaling pathway;cellular process;cellular response to stimulus;negative regulation of biological process;negative regulation of biosynthetic process;negative regulation of cellular biosynthetic process;negative regulation of cellular macromolecule biosynthetic process;negative regulation of cellular metabolic process;negative regulation of cell…	binding;DNA binding;nucleic acid binding;nucleic acid binding transcription factor activity;nucleotide binding;protein binding;protein binding transcription factor activity;RNA polymerase II transcription factor binding;RNA polymerase II transcription factor binding transcription factor activity;RNA polymerase II transcription factor binding transcription factor activity involved in negative regu…	cell part;extracellular membrane-bounded organelle;extracellular organelle;extracellular region part;extracellular vesicular exosome;intracellular organelle part;intracellular part;macromolecular complex;membrane-bounded organelle;membrane-bounded vesicle;nuclear part;nucleoplasm;nucleoplasm part;organelle;organelle part;protein complex;transcriptional repressor complex;vesicle	20.9628	20.9488	19.5739	21.4693	21.9316	22.9682	21.8259	21.3453
A0A0S2Z4N8;A0A024R0V4;P50552;A0A0S2Z4I9;A0A0S2Z4I7;K7EM16	Vasodilator-stimulated phosphoprotein	VASP	1.27682	1.70717	6	6	265	265	35427	19819	63497000	20	actin cytoskeleton organization;actin filament organization;actin filament-based process;actin polymerization or depolymerization;activation of immune response;anatomical structure formation involved in morphogenesis;antigen receptor-mediated signaling pathway;axon guidance;biological regulation;cell junction assembly;cell junction organization;cell surface receptor linked signaling pathway;cellu…	binding;profilin binding;protein binding	actin cytoskeleton;adherens junction;anchoring junction;cell junction;cell part;cell projection;cell projection membrane;cell projection part;cell-cell junction;cell-substrate adherens junction;cell-substrate junction;cytoplasm;cytoplasmic part;cytoskeleton;cytosol;extracellular membrane-bounded organelle;extracellular organelle;extracellular region part;extracellular vesicular exosome;filopodium…	22.4873	22.8809	23.0083	23.2191	23.4386	25.2001	24.1803	23.8839
Q9NPJ3	Acyl-coenzyme A thioesterase 13;Acyl-coenzyme A thioesterase 13, N-terminally processed	ACOT13	1.27626	1.12802	3	3	286	286	1496	70907	32085000	7	cellular component assembly;cellular component organization;cellular component organization or biogenesis;macromolecular complex assembly;macromolecular complex subunit organization;metabolic process;protein complex assembly;protein complex subunit organization;protein homooligomerization;protein homotetramerization;protein oligomerization;protein tetramerization	acyl-CoA hydrolase activity;catalytic activity;CoA hydrolase activity;hydrolase activity;hydrolase activity, acting on ester bonds;thiolester hydrolase activity	cell part;cytoplasmic part;cytoskeletal part;cytosol;extracellular membrane-bounded organelle;extracellular organelle;extracellular region part;extracellular vesicular exosome;intracellular membrane-bounded organelle;intracellular non-membrane-bounded organelle;intracellular organelle;intracellular organelle part;intracellular part;membrane-bounded organelle;membrane-bounded vesicle;mitochondrion…	23.3585	20.7259	21.9812	21.381	22.8918	22.8432	23.6681	23.1486
B4DZZ0;B3KQB4;A0A024R371;O75915	PRA1 family protein 3	ARL6IP5	1.27583	4.02672	3	3	212	212	19206	12299	87276000	10	acidic amino acid transport;amine transport;amino acid transport;anion transport;biological regulation;carboxylic acid transport;cellular chemical homeostasis;cellular homeostasis;cellular ion homeostasis;cellular process;chemical homeostasis;establishment of localization;homeostatic process;induction of apoptosis;induction of apoptosis by intracellular signals;induction of apoptosis by oxidative…		cell part;cytoplasm;cytoplasmic part;endoplasmic reticulum;endoplasmic reticulum membrane;endoplasmic reticulum part;extracellular membrane-bounded organelle;extracellular organelle;extracellular region part;extracellular vesicular exosome;integral to membrane;intracellular membrane-bounded organelle;intracellular organelle;intracellular organelle part;intracellular part;intrinsic to membrane;mem…	23.5223	23.3843	23.5193	23.2137	24.3403	24.7341	24.8675	24.801
Q7L0Y3;C9JVB6	Mitochondrial ribonuclease P protein 1	TRMT10C	1.27416	1.17143	7	7	208	208	47346	20027	133080000	20	cellular component organization;cellular component organization at cellular level;cellular component organization or biogenesis;cellular component organization or biogenesis at cellular level;cellular macromolecule metabolic process;cellular metabolic process;cellular nitrogen compound metabolic process;cellular process;macromolecule metabolic process;metabolic process;mitochondrial RNA 5'-end pr…	catalytic activity;methyltransferase activity;transferase activity;transferase activity, transferring one-carbon groups	cell part;cytoplasmic part;intracellular membrane-bounded organelle;intracellular non-membrane-bounded organelle;intracellular organelle;intracellular organelle part;intracellular part;membrane-bounded organelle;mitochondrial nucleoid;mitochondrial part;mitochondrion;non-membrane-bounded organelle;nuclear part;nucleoid;nucleoplasm;organelle;organelle part	25.3854	22.8059	23.3226	23.9707	25.1573	24.9657	24.9672	25.4911
A6NG10;K7EMC9;A0A024R8L1;Q969T9;K7EIJ0;B4DFG2;K7ENL2;Q7Z511;K7EIN1;K7ESN4;K7EIK1;B4DFL8	WW domain-binding protein 2	WBP2	1.27234	2.61675	4	4	293	293	25807	91736	66773000	13	biological regulation;cellular process;cellular response to chemical stimulus;cellular response to endogenous stimulus;cellular response to estrogen stimulus;cellular response to hormone stimulus;cellular response to organic substance;cellular response to steroid hormone stimulus;cellular response to stimulus;establishment of localization;establishment of protein localization;positive regulation …	binding;chromatin binding;chromatin DNA binding;core promoter binding;core promoter sequence-specific DNA binding;DNA binding;nucleic acid binding;protein binding transcription factor activity;regulatory region DNA binding;regulatory region nucleic acid binding;RNA polymerase II core promoter sequence-specific DNA binding;RNA polymerase II regulatory region DNA binding;RNA polymerase II regulator…	cell part;chromatin;chromosomal part;intracellular organelle part;intracellular part;nuclear chromatin;nuclear chromosome part;nuclear part;organelle part	22.6995	23.08	22.8793	23.4103	23.9547	24.7138	24.5597	23.9303
Q6IQ49	Protein SDE2 homolog	SDE2	1.26867	1.77932	10	10	231	231	49741	24147	259080000	26				24.8483	26.0833	24.6539	24.4483	26.0737	26.3554	26.5732	26.1062
A0A024R7G2;O95716;B2R8W8	Ras-related protein Rab-3D	RAB3D	1.26834	1.49576	2	2	105	105	24267	37165	7856100	3	biological regulation;cellular macromolecule metabolic process;cellular metabolic process;cellular process;cellular protein metabolic process;cellular response to stimulus;establishment of localization;establishment of localization in cell;establishment of protein localization;exocytosis;intracellular protein transport;intracellular signal transduction;intracellular transport;macromolecule metabo…	binding;catalytic activity;cytoskeletal protein binding;GTP binding;GTPase activity;guanyl nucleotide binding;guanyl ribonucleotide binding;hydrolase activity;hydrolase activity, acting on acid anhydrides;hydrolase activity, acting on acid anhydrides, in phosphorus-containing anhydrides;myosin binding;myosin V binding;nucleoside-triphosphatase activity;nucleotide binding;protein binding;purine nu…	cell part;clathrin-coated vesicle;coated vesicle;cytoplasmic membrane-bounded vesicle;cytoplasmic part;cytoplasmic vesicle;cytoplasmic vesicle membrane;cytoplasmic vesicle part;endosome;extracellular membrane-bounded organelle;extracellular organelle;extracellular region part;extracellular vesicular exosome;intracellular membrane-bounded organelle;intracellular organelle;intracellular organelle p…	20.848	21.2243	20.5604	20.4441	20.8454	22.1222	22.3782	22.8044
B2R9Y1;Q8WWV3;G3V1R2;Q96RL8	Reticulon-4-interacting protein 1, mitochondrial	RTN4IP1;NIMP	1.25721	2.6727	5	5	158	158	38763	97254	22855000	9		binding;catalytic activity;cation binding;ion binding;metal ion binding;oxidoreductase activity;transition metal ion binding;zinc ion binding	cell part;cytoplasmic part;intracellular membrane-bounded organelle;intracellular organelle;intracellular part;membrane-bounded organelle;mitochondrion;organelle	21.3097	21.3455	21.7766	21.8251	22.6012	22.7429	23.4132	22.5286
Q8IYL3	UPF0688 protein C1orf174	C1orf174	1.25072	3.08451	3	3	95	95	25977	48259	38615000	3			cell part;intracellular membrane-bounded organelle;intracellular organelle;intracellular part;membrane-bounded organelle;nucleus;organelle	22.1608	22.4176	22.4113	22.7877	23.2367	23.916	23.7704	23.8571
Q6NUM7;A0A024R640;Q9NUQ2	1-acyl-sn-glycerol-3-phosphate acyltransferase epsilon	AGPAT5	1.25066	0.663256	2	2	9	9	41165	27905	89672000	4	acylglycerol biosynthetic process;acylglycerol metabolic process;biosynthetic process;carboxylic acid biosynthetic process;carboxylic acid metabolic process;CDP-diacylglycerol biosynthetic process;CDP-diacylglycerol metabolic process;cell differentiation;cellular biosynthetic process;cellular developmental process;cellular ketone metabolic process;cellular lipid metabolic process;cellular metabol…	1-acylglycerol-3-phosphate O-acyltransferase activity;acylglycerol O-acyltransferase activity;catalytic activity;O-acyltransferase activity;transferase activity;transferase activity, transferring acyl groups;transferase activity, transferring acyl groups other than amino-acyl groups	cell part;cytoplasmic part;endoplasmic reticulum membrane;endoplasmic reticulum part;envelope;integral to membrane;intracellular membrane-bounded organelle;intracellular organelle;intracellular organelle part;intracellular part;intrinsic to membrane;membrane;membrane part;membrane-bounded organelle;mitochondrial membrane;mitochondrial outer membrane;mitochondrial part;mitochondrion;nuclear envelo…	23.0113	23.6738	20.6479	24.5922	24.6925	24.8543	23.9793	23.4017
A8K2G0;O15126;B4DP10;B4E2V7;A0A087WXB0;A0A087WZA6	Secretory carrier-associated membrane protein 1	SCAMP1	1.25034	1.56777	8	8	358	358	37833	72595	440560000	38	cellular component organization;cellular component organization or biogenesis;cellular membrane organization;cellular process;endocytosis;establishment of localization;establishment of localization in cell;establishment of protein localization;exocytosis;Golgi vesicle transport;intracellular transport;membrane invagination;membrane organization;post-Golgi vesicle-mediated transport;protein transp…		cell part;clathrin coated vesicle membrane;clathrin-coated vesicle;coated vesicle;coated vesicle membrane;cytoplasmic membrane-bounded vesicle;cytoplasmic part;cytoplasmic vesicle;cytoplasmic vesicle membrane;cytoplasmic vesicle part;endosomal part;endosome membrane;Golgi apparatus part;integral to membrane;intracellular membrane-bounded organelle;intracellular organelle;intracellular organelle p…	24.9878	25.2352	25.7274	25.9287	26.5578	27.3509	27.2343	25.7375
H3BQQ9;A8K503;Q7KZS0;B0QYN7;P63279;H3BPC4	SUMO-conjugating enzyme UBC9	UBE2I	1.24921	0.9762	3	3	219	219	15516	51924	202240000	8	biological regulation;catabolic process;cell cycle phase;cell cycle process;cell division;cellular catabolic process;cellular component organization;cellular component organization at cellular level;cellular component organization or biogenesis;cellular component organization or biogenesis at cellular level;cellular macromolecule catabolic process;cellular macromolecule metabolic process;cellular…	acid-amino acid ligase activity;adenyl nucleotide binding;adenyl ribonucleotide binding;ATP binding;binding;catalytic activity;enzyme binding;ligase activity;ligase activity, forming carbon-nitrogen bonds;nucleotide binding;protein binding;protein domain specific binding;purine nucleotide binding;purine ribonucleoside triphosphate binding;purine ribonucleotide binding;ribonucleotide binding;RING-…	cell part;cell projection;chromosomal part;cytoplasm;dendrite;fibrillar center;intracellular membrane-bounded organelle;intracellular organelle;intracellular organelle part;intracellular part;membrane-bounded organelle;neuron projection;nuclear body;nuclear chromosome part;nuclear part;nucleolar part;nucleoplasm;nucleoplasm part;nucleus;organelle;organelle part;PML body;synapse;synaptonemal compl…	25.1884	24.9075	22.9869	25.52	24.9771	25.909	26.2581	26.4555
Q9HCH0;A0A024R107;H7C1V4	Nck-associated protein 5-like	NCKAP5L;hCG_1640179	1.24526	0.686008	5	5	5	5	13901	53973	15185000	7				22.3414	19.399	22.9867	20.415	22.5777	23.0043	22.8049	21.7362
A0A024RD84;Q15035	Translocating chain-associated membrane protein;Translocating chain-associated membrane protein 2	TRAM2	1.24323	0.467063	1	1	3	3	43327	39034	8889100	4	biosynthetic process;collagen biosynthetic process;collagen metabolic process;establishment of localization;establishment of protein localization;macromolecule biosynthetic process;macromolecule metabolic process;metabolic process;multicellular organismal macromolecule metabolic process;multicellular organismal metabolic process;multicellular organismal process;protein transport;transport		cell part;integral to membrane;intrinsic to membrane;membrane part	23.5584	18.8959	19.3701	22.5093	22.7249	23.0644	21.5024	22.015
E7EV99;E7ENY0;P35611;Q4TT76;H0Y9H2;Q96D30;A0A0A0MSR2	Alpha-adducin	ADD1;LA04NC01-25A3.2-001	1.24286	2.29217	13	13	231	231	70055	40235	249030000	43	actin cytoskeleton organization;actin filament bundle assembly;actin filament capping;actin filament organization;actin filament-based process;anatomical structure homeostasis;anatomical structure morphogenesis;apoptosis;barbed-end actin filament capping;biological regulation;cell communication;cell death;cell differentiation;cell morphogenesis;cell volume homeostasis;cellular component assembly;…	actin binding;actin filament binding;binding;calmodulin binding;cytoskeletal protein binding;identical protein binding;protein binding;protein dimerization activity;protein heterodimerization activity;protein homodimerization activity;spectrin binding;structural molecule activity;transcription factor binding	adherens junction;anchoring junction;cell junction;cell part;cell projection;cell projection part;cell-substrate adherens junction;cell-substrate junction;cytoplasmic part;cytoskeletal part;cytoskeleton;cytosol;dendritic spine;F-actin capping protein complex;focal adhesion;intermediate filament cytoskeleton;intracellular membrane-bounded organelle;intracellular non-membrane-bounded organelle;intr…	24.974	25.027	24.706	24.2673	26.1248	26.1039	25.3219	26.3951
P08754	Guanine nucleotide-binding protein G(k) subunit alpha	GNAI3	1.24103	0.853179	3	3	96	96	40532	24417	72840000	15	biological regulation;blood coagulation;cAMP-mediated signaling;cell activation;cell communication;cell cycle;cell division;cell surface receptor linked signaling pathway;cell-cell signaling;cellular component organization;cellular component organization at cellular level;cellular component organization or biogenesis;cellular component organization or biogenesis at cellular level;cellular membran…	binding;catalytic activity;cation binding;G-protein beta/gamma-subunit complex binding;G-protein-coupled receptor binding;GTP binding;GTPase activity;guanyl nucleotide binding;guanyl ribonucleotide binding;hydrolase activity;hydrolase activity, acting on acid anhydrides;hydrolase activity, acting on acid anhydrides, in phosphorus-containing anhydrides;ion binding;metabotropic serotonin receptor b…	cell part;centrosome;cytoplasm;cytoplasmic membrane-bounded vesicle;cytoplasmic part;cytoplasmic vesicle;cytoskeletal part;extracellular membrane-bounded organelle;extracellular organelle;extracellular region part;extracellular vesicular exosome;extrinsic to internal side of plasma membrane;extrinsic to membrane;extrinsic to plasma membrane;Golgi apparatus;heterotrimeric G-protein complex;intrace…	24.0198	22.3296	22.2325	21.564	25.0269	22.6279	23.3859	24.0695
A0A024R7V6;P61019;A0A0A1HAW1	Ras-related protein Rab-2A	RAB2;RAB2A	1.2389	0.676952	7	5	382	264	23545	32786	138530000	35	biological regulation;cell cycle;cellular component organization;cellular component organization at cellular level;cellular component organization or biogenesis;cellular component organization or biogenesis at cellular level;cellular process;cellular response to stimulus;ER to Golgi vesicle-mediated transport;establishment of localization;establishment of localization in cell;establishment of pro…	binding;catalytic activity;GDP binding;GTP binding;GTPase activity;guanyl nucleotide binding;guanyl ribonucleotide binding;hydrolase activity;hydrolase activity, acting on acid anhydrides;hydrolase activity, acting on acid anhydrides, in phosphorus-containing anhydrides;nucleoside-triphosphatase activity;nucleotide binding;purine nucleotide binding;purine ribonucleoside triphosphate binding;purin…	cell part;cytoplasmic membrane-bounded vesicle;cytoplasmic part;cytoplasmic vesicle;endoplasmic reticulum membrane;endoplasmic reticulum part;endoplasmic reticulum-Golgi intermediate compartment membrane;extracellular membrane-bounded organelle;extracellular organelle;extracellular region part;extracellular vesicular exosome;Golgi apparatus;Golgi apparatus part;Golgi membrane;intracellular;intrac…	24.3474	23.6779	23.2477	22.9113	24.4378	23.796	23.6889	27.2172
H3BT22;B3KMP9;A0A024R6R3;Q9Y5N6	Origin recognition complex subunit 6	ORC6;ORC6L	1.23777	1.89599	2	2	54	54	22791	2897	35851000	5	biosynthetic process;cell cycle;cell cycle process;cellular biosynthetic process;cellular macromolecule biosynthetic process;cellular macromolecule metabolic process;cellular metabolic process;cellular nitrogen compound metabolic process;cellular process;DNA metabolic process;DNA replication;DNA-dependent DNA replication;G1/S transition of mitotic cell cycle;macromolecule biosynthetic process;mac…	binding;DNA binding;nucleic acid binding	cell part;chromosomal part;intracellular membrane-bounded organelle;intracellular organelle;intracellular organelle part;intracellular part;macromolecular complex;membrane;membrane-bounded organelle;nuclear chromosome part;nuclear origin of replication recognition complex;nuclear part;nucleoplasm;nucleus;organelle;organelle part;origin recognition complex;plasma membrane;protein complex	21.7075	22.0628	22.3907	22.7067	22.7294	23.3361	23.7269	24.0262
Q5M8S8;Q6P051;O95475	Homeobox protein SIX6	SIX6	1.23748	2.0402	3	3	161	161	33024	12327	69386000	10	anatomical structure development;anatomical structure morphogenesis;anterior/posterior pattern specification;axis specification;behavior;biological regulation;brain development;cell communication;cell differentiation;cell maturation;cell proliferation;cell proliferation in forebrain;cell-cell signaling;cell-cell signaling involved in cell fate commitment;cellular developmental process;cellular pr…	binding;DNA binding;enhancer binding;enhancer sequence-specific DNA binding;nucleic acid binding;nucleic acid binding transcription factor activity;protein binding transcription factor activity;regulatory region DNA binding;regulatory region nucleic acid binding;RNA polymerase II distal enhancer sequence-specific DNA binding;RNA polymerase II regulatory region DNA binding;RNA polymerase II regula…	cell part;intracellular membrane-bounded organelle;intracellular organelle;intracellular part;membrane-bounded organelle;nucleus;organelle	22.6919	23.1464	23.3772	23.4099	23.6014	24.4548	24.9238	24.5954
E5RHI1;Q8IYU2	E3 ubiquitin-protein ligase HACE1	HACE1	1.23691	0.751177	1	1	43	43	22798	20602	5993100	1	biological regulation;biosynthetic process;cell cycle;cellular biosynthetic process;cellular component organization;cellular component organization at cellular level;cellular component organization or biogenesis;cellular component organization or biogenesis at cellular level;cellular macromolecule biosynthetic process;cellular macromolecule metabolic process;cellular metabolic process;cellular ni…	acid-amino acid ligase activity;binding;catalytic activity;enzyme binding;GTPase binding;ligase activity;ligase activity, forming carbon-nitrogen bonds;protein binding;Rab GTPase binding;Rac GTPase binding;Ras GTPase binding;Rho GTPase binding;small conjugating protein ligase activity;small GTPase binding;ubiquitin-protein ligase activity	cell part;cytoplasmic part;endoplasmic reticulum;Golgi apparatus part;Golgi cisterna membrane;Golgi membrane;intracellular membrane-bounded organelle;intracellular organelle;intracellular organelle part;intracellular part;membrane;membrane-bounded organelle;nucleus;organelle;organelle membrane;organelle part	20.3589	20.0607	19.1997	22.5411	21.8292	20.8455	21.696	22.7372
Q6FI77;Q5RL73	RNA-binding protein 48	DKFZP564O0523;RBM48	1.23606	1.37192	1	1	28	28	41125	24496	9172500	2		binding;nucleic acid binding;RNA binding	cell part;intracellular organelle part;intracellular part;nuclear part;nucleoplasm;organelle part	20.1188	20.1915	20.3663	20.8069	20.2692	21.9756	22.3153	21.8676
O43681;A0A087WXS7;B4DEE5	ATPase ASNA1	ASNA1	1.23431	0.810029	6	6	27	27	38792	49286	296130000	22	anion transport;biological regulation;cellular localization;cellular macromolecule localization;cellular macromolecule metabolic process;cellular metabolic process;cellular process;cellular protein localization;cellular protein metabolic process;cellular response to chemical stimulus;cellular response to organic substance;cellular response to stimulus;cellular response to stress;cellular response…	adenyl nucleotide binding;adenyl ribonucleotide binding;anion transmembrane transporter activity;arsenite transmembrane transporter activity;ATP binding;ATPase activity;binding;catalytic activity;cation binding;hydrolase activity;hydrolase activity, acting on acid anhydrides;hydrolase activity, acting on acid anhydrides, in phosphorus-containing anhydrides;inorganic anion transmembrane transporte…	cell part;cytoplasm;cytoplasmic part;endoplasmic reticulum;endoplasmic reticulum membrane;endoplasmic reticulum part;extracellular membrane-bounded organelle;extracellular organelle;extracellular region part;extracellular vesicular exosome;intracellular membrane-bounded organelle;intracellular non-membrane-bounded organelle;intracellular organelle;intracellular organelle part;intracellular part;m…	23.7056	24.6646	25.9106	25.9863	25.0992	26.7452	25.8415	27.5183
O75396	Vesicle-trafficking protein SEC22b	SEC22B	1.23394	2.27097	10	10	391	391	24593	10789	413680000	54	biological regulation;cellular process;ER to Golgi vesicle-mediated transport;establishment of localization;establishment of localization in cell;establishment of protein localization;Golgi vesicle transport;intracellular transport;positive regulation of biological process;positive regulation of catabolic process;positive regulation of macromolecule metabolic process;positive regulation of metabo…		cell part;cytoplasmic membrane-bounded vesicle;cytoplasmic part;cytoplasmic vesicle;endoplasmic reticulum membrane;endoplasmic reticulum part;endoplasmic reticulum-Golgi intermediate compartment;endoplasmic reticulum-Golgi intermediate compartment membrane;Golgi apparatus part;Golgi membrane;integral to membrane;intracellular membrane-bounded organelle;intracellular organelle;intracellular organe…	25.8102	25.5494	25.9021	26.1881	26.9109	26.6259	27.0179	27.8309
A0A140VJN8;O60664;K7EL96;K7ERZ3	Perilipin-3	PLIN3	1.23199	4.91081	11	11	395	395	46946	91673	317540000	45	cellular process;establishment of localization;transport;vesicle-mediated transport		cell part;cytoplasm;cytoplasmic part;endosomal part;endosome;endosome membrane;Golgi apparatus;intracellular membrane-bounded organelle;intracellular organelle;intracellular organelle part;intracellular part;lipid particle;membrane;membrane-bounded organelle;organelle;organelle membrane;organelle part	25.1643	25.2465	25.216	25.3308	26.4805	26.224	26.5583	26.6228
Q9Y5X3;Q5QPE4;Q53FH8;Q6P5V6;Q5QPE5;B7Z476	Sorting nexin-5	SNX5	1.23148	1.7186	7	7	188	188	46816	16829	117460000	23	cellular component organization;cellular component organization at cellular level;cellular component organization or biogenesis;cellular component organization or biogenesis at cellular level;cellular membrane organization;cellular process;endocytosis;endosome transport;establishment of localization;establishment of localization in cell;establishment of protein localization;intracellular protein …	binding;cytoskeletal protein binding;dynactin binding;lipid binding;phosphatidylinositol binding;phospholipid binding;protein binding	cell part;cell projection;cytoplasmic part;cytoplasmic vesicle membrane;cytoplasmic vesicle part;early endosome membrane;endosomal part;endosome membrane;extrinsic to endosome membrane;extrinsic to internal side of plasma membrane;extrinsic to membrane;extrinsic to organelle membrane;extrinsic to plasma membrane;intracellular organelle part;intracellular part;macromolecular complex;macropinocytic…	24.1433	23.7784	24.1172	23.5078	24.556	25.5686	25.8819	24.4661
Q6P4F7;H3BQ41	Rho GTPase-activating protein 11A	ARHGAP11A	1.23102	1.52829	3	3	39	39	11386	78098	8068900	5	biological regulation;cellular process;cellular response to stimulus;intracellular signal transduction;regulation of biological process;regulation of cellular process;regulation of response to stimulus;regulation of signal transduction;regulation of signaling;regulation of small GTPase mediated signal transduction;response to stimulus;signal transduction;small GTPase mediated signal transduction	enzyme activator activity;enzyme regulator activity;GTPase activator activity;GTPase regulator activity;nucleoside-triphosphatase regulator activity	cell part;cytoplasmic part;cytosol;intracellular;intracellular part	20.2992	20.3466	21.0849	20.6993	20.8757	22.3952	22.5603	21.5228
H0Y512;Q9HDC9	Adipocyte plasma membrane-associated protein	APMAP	1.23101	0.340389	4	4	81	81	45294	1258	103660000	11	biosynthetic process;metabolic process	amine-lyase activity;arylesterase activity;carbon-nitrogen lyase activity;carboxylic ester hydrolase activity;catalytic activity;hydrolase activity;hydrolase activity, acting on ester bonds;lyase activity;strictosidine synthase activity	cell part;cell surface;extracellular membrane-bounded organelle;extracellular organelle;extracellular region part;extracellular vesicular exosome;integral to membrane;intrinsic to membrane;membrane;membrane part;membrane-bounded organelle;membrane-bounded vesicle;organelle;vesicle	23.828	23.6234	22.1101	21.0937	25.1028	20.4321	23.0598	26.9847
B3KN55;Q9UBS8;D6RA38	E3 ubiquitin-protein ligase RNF14	RNF14	1.22875	0.987506	3	3	112	112	53821	31859	15850000	7	androgen receptor signaling pathway;biological regulation;biosynthetic process;cellular biosynthetic process;cellular macromolecule biosynthetic process;cellular macromolecule metabolic process;cellular metabolic process;cellular nitrogen compound metabolic process;cellular process;cellular protein metabolic process;cellular response to stimulus;intracellular receptor mediated signaling pathway;m…	acid-amino acid ligase activity;androgen receptor binding;binding;catalytic activity;cation binding;hormone receptor binding;ion binding;ligase activity;ligase activity, forming carbon-nitrogen bonds;metal ion binding;nuclear hormone receptor binding;protein binding;protein binding transcription factor activity;receptor binding;small conjugating protein ligase activity;steroid hormone receptor bi…	cell part;cytoplasm;intracellular membrane-bounded organelle;intracellular organelle;intracellular part;membrane-bounded organelle;nucleus;organelle	19.7904	22.2431	21.8306	21.566	21.7038	22.8107	23.3332	22.4974
Q5RKT7;B2RDW1;P62979;J3QS39;J3QTR3;F5H6Q2;Q3MIH3;F5GYU3;F5H2Z3;F5H265;Q5UGI3;B4DV12;F5H388;F5H747;F5GXK7;J3QKN0;Q5U5U6;Q5PY61;Q9UFQ0;Q96C32;Q96MH4;L8B4I8;L8B196;Q96H31;L8B4R0;A8K674;L8B4Z6;L8B4M0;L8B4J3;Q66K58;Q59EM9;P62987;P0CG47;P0CG48;M0R1V7;Q49A90;Q8WYN9;M0R1M6;M0R2S1	Ubiquitin-40S ribosomal protein S27a;Ubiquitin;40S ribosomal protein S27a;Ubiquitin-60S ribosomal protein L40;Ubiquitin;60S ribosomal protein L40;Polyubiquitin-B;Ubiquitin;Polyubiquitin-C;Ubiquitin	RPS27A;HEL112;UBB;UBC;UBA52;DKFZp434K0435;UbC	1.22388	2.25059	8	8	558	558	17905	10763	2952400000	190	activation of immune response;activation of innate immune response;activation of MAPK activity;adipose tissue development;alcohol metabolic process;anaphase-promoting complex-dependent proteasomal ubiquitin-dependent protein catabolic process;anatomical structure development;anatomical structure morphogenesis;antigen processing and presentation;antigen processing and presentation of exogenous ant…	binding;cation binding;enzyme binding;ion binding;metal ion binding;protease binding;protein binding;structural constituent of ribosome;structural molecule activity	cell body;cell part;cell projection;cytoplasm;cytoplasmic part;cytoplasmic vesicle membrane;cytoplasmic vesicle part;cytosol;cytosolic large ribosomal subunit;cytosolic small ribosomal subunit;endocytic vesicle membrane;endosomal part;endosome membrane;extracellular membrane-bounded organelle;extracellular organelle;extracellular region part;extracellular vesicular exosome;intracellular membrane-…	28.729	28.0553	28.5178	29.0023	29.2444	29.8217	30.2696	29.8642
P05556;C9JPK5;E7ERX5;Q5T3E6;E9PLR6;E7EUI6;E7EQW5	Integrin beta-1;Integrin beta	ITGB1	1.22349	3.93035	2	2	34	34	88414	37813	17742000	2	actin cytoskeleton organization;actin filament-based process;actomyosin structure organization;anatomical structure homeostasis;anatomical structure morphogenesis;associative learning;axon extension;axon guidance;B cell activation;B cell differentiation;behavior;biological adhesion;biological regulation;blood coagulation;blood vessel endothelial cell migration;calcium ion homeostasis;calcium-inde…	actin binding;binding;cation binding;cell adhesion molecule binding;cytoskeletal protein binding;enzyme binding;ion binding;metal ion binding;peptide binding;protease binding;protein binding;protein dimerization activity;protein heterodimerization activity;receptor activity;viral receptor activity	acrosomal vesicle;adherens junction;alpha10-beta1 integrin complex;alpha11-beta1 integrin complex;alpha1-beta1 integrin complex;alpha2-beta1 integrin complex;alpha3-beta1 integrin complex;alpha7-beta1 integrin complex;alpha8-beta1 integrin complex;alpha9-beta1 integrin complex;anchoring junction;basement membrane;cell division site part;cell junction;cell part;cell projection;cell projection memb…	21.2936	21.299	21.3249	21.3341	22.1252	22.6253	22.7127	22.6824
O94789		MNB/DYRK	1.22007	1.53184	2	2	194	194	16331	36397	19242000	9	cellular macromolecule metabolic process;cellular metabolic process;cellular process;cellular protein metabolic process;macromolecule metabolic process;macromolecule modification;metabolic process;phosphate-containing compound metabolic process;phosphorus metabolic process;phosphorylation;primary metabolic process;protein autophosphorylation;protein metabolic process;protein modification process;…	catalytic activity;kinase activity;phosphotransferase activity, alcohol group as acceptor;protein kinase activity;protein serine/threonine/tyrosine kinase activity;transferase activity;transferase activity, transferring phosphorus-containing groups		20.7419	21.0863	21.1865	21.9597	21.5301	22.3923	22.8368	23.0954
Q7L5D6;C9JPA8;C9JY46;C9JHN8;A0A024R847	Golgi to ER traffic protein 4 homolog	GET4;C7orf20	1.21995	0.696252	2	2	76	76	36504	19063	41998000	6	cellular localization;cellular macromolecule localization;cellular process;cellular protein localization;establishment of localization;localization;localization within membrane;macromolecule localization;protein insertion into ER membrane;protein insertion into membrane;protein localization;protein localization to organelle;tail-anchored membrane protein insertion into ER membrane;transport		BAT3 complex;cell part;cytoplasmic part;cytosol;cytosolic part;ER membrane insertion complex;intracellular part;macromolecular complex;protein complex	21.8046	21.3789	23.394	23.4961	21.7898	24.1621	24.5331	24.4684
B4DEB8;Q7Z3Z6;B4DDG0;B4DEA5;B4E171;P41732	Tetraspanin;Tetraspanin-7	TM4SF2;TSPAN7	1.21902	1.47139	1	1	67	67	24475	62267	102610000	17	viral reproduction	binding;calcium ion binding;cation binding;ion binding;metal ion binding	cell part;extracellular region;integral to membrane;integral to plasma membrane;intrinsic to membrane;intrinsic to plasma membrane;membrane part;plasma membrane part	22.6372	23.2238	23.7067	23.6158	25.0696	25.2374	23.98	23.7727
K7EK00;Q96ND0;K7ERQ2	Protein FAM210A	FAM210A	1.21865	0.770969	2	2	67	67	30292	23779	4207300	2			cell part;cytoplasmic part;integral to membrane;intracellular membrane-bounded organelle;intracellular organelle;intracellular part;intrinsic to membrane;membrane part;membrane-bounded organelle;mitochondrion;organelle	21.8761	19.9226	19.3954	19.7113	19.9617	22.5379	21.4544	21.8261
A0A024RBU0;Q9H9H4;F5H1F6;F5H4M0	Vacuolar protein sorting-associated protein 37B	VPS37B	1.21567	1.96199	3	3	105	105	31307	11993	76705000	15	cellular component assembly;cellular component assembly at cellular level;cellular component organization;cellular component organization at cellular level;cellular component organization or biogenesis;cellular component organization or biogenesis at cellular level;cellular process;cellular process involved in reproduction;endosome transport;establishment of localization;establishment of localiza…	binding;calcium-dependent protein binding;protein binding	cell part;cytoplasm;cytoplasmic part;endosomal part;endosome;endosome membrane;ESCRT I complex;extracellular membrane-bounded organelle;extracellular organelle;extracellular region part;extracellular vesicular exosome;intracellular membrane-bounded organelle;intracellular organelle;intracellular organelle part;intracellular part;late endosome membrane;macromolecular complex;membrane;membrane part…	22.5374	22.9319	23.1532	23.2398	23.3296	24.3848	24.6943	24.3162
A0A024R6J0;A0A024R6E4;Q9NWQ4;G3V553	G patch domain-containing protein 2-like	C14orf118;GPATCH2L	1.21344	1.87952	2	2	46	46	53895	45201	14029000	2				20.5866	20.7819	20.7346	20.6331	21.3951	22.3436	22.6273	21.224
B5MD87;B4DGI7;B4DI71;D3DWK4;A0A0A0MQS1;Q53H96	Pyrroline-5-carboxylate reductase;Pyrroline-5-carboxylate reductase 3	PYCRL	1.21312	1.07406	1	1	8	8	14341	25738	10464000	3	amine biosynthetic process;amine metabolic process;biosynthetic process;carboxylic acid biosynthetic process;carboxylic acid metabolic process;cellular amine metabolic process;cellular amino acid biosynthetic process;cellular amino acid metabolic process;cellular biosynthetic process;cellular ketone metabolic process;cellular metabolic process;cellular nitrogen compound biosynthetic process;cellu…	catalytic activity;oxidoreductase activity;oxidoreductase activity, acting on the CH-NH group of donors;oxidoreductase activity, acting on the CH-NH group of donors, NAD or NADP as acceptor;pyrroline-5-carboxylate reductase activity		21.7618	21.991	21.0791	20.3563	21.3008	23.1642	23.2683	22.3074
A0A024RBE7;P42167;G5E972;A0A024RBH7;Q59G12	Lamina-associated polypeptide 2, isoforms beta/gamma;Thymopoietin;Thymopentin	TMPO	1.21238	2.84677	9	9	289	289	5067	71265	271860000	33		binding;DNA binding;lamin binding;nucleic acid binding;protein binding	cell part;cytoplasm;envelope;integral to membrane;intracellular membrane-bounded organelle;intracellular organelle;intracellular organelle part;intracellular part;intrinsic to membrane;membrane;membrane part;membrane-bounded organelle;nuclear envelope;nuclear inner membrane;nuclear membrane;nuclear part;nucleus;organelle;organelle envelope;organelle inner membrane;organelle membrane;organelle part	24.6586	24.9234	25.0451	24.9125	26.0549	26.6783	25.8807	25.7753
Q99808	Equilibrative nucleoside transporter 1	SLC29A1	1.21232	2.74619	2	2	48	48	50219	61745	29529000	5	behavior;biological regulation;body fluid secretion;carbohydrate homeostasis;cellular chemical homeostasis;cellular glucose homeostasis;cellular homeostasis;cellular ion homeostasis;cellular metabolic process;cellular nitrogen compound metabolic process;cellular process;cellular response to carbohydrate stimulus;cellular response to chemical stimulus;cellular response to glucose stimulus;cellular…	nucleobase-containing compound transmembrane transporter activity;nucleoside transmembrane transporter activity;substrate-specific transmembrane transporter activity;substrate-specific transporter activity;transmembrane transporter activity;transporter activity	apical plasma membrane;basolateral plasma membrane;cell part;integral to membrane;integral to plasma membrane;intrinsic to membrane;intrinsic to plasma membrane;membrane;membrane part;plasma membrane;plasma membrane part	22.1035	21.6078	21.2633	21.6076	22.5864	22.8039	23.2801	22.7611
Q53TS1;D6W5D9;Q9H165;B3KRW8;B4DMK8;I3PG23;B4DT16;D9YZV9;B3KNX8	B-cell lymphoma/leukemia 11A	BCL11A	1.21073	1.79942	4	4	75	75	77018	60188	34772000	6	B cell activation;B cell differentiation;biological regulation;cell activation;cell differentiation;cellular developmental process;cellular macromolecule metabolic process;cellular metabolic process;cellular process;cellular protein metabolic process;developmental process;immune system process;leukocyte activation;leukocyte differentiation;lymphocyte activation;lymphocyte differentiation;macromol…	binding;cation binding;core promoter proximal region DNA binding;core promoter proximal region sequence-specific DNA binding;DNA binding;identical protein binding;ion binding;metal ion binding;nucleic acid binding;nucleic acid binding transcription factor activity;protein binding;protein binding transcription factor activity;protein dimerization activity;protein heterodimerization activity;protei…	cell part;cytoplasm;intracellular membrane-bounded organelle;intracellular organelle;intracellular organelle part;intracellular part;membrane-bounded organelle;nuclear part;nucleoplasm;nucleus;organelle;organelle part	21.637	22.1048	21.8105	23.0813	22.9236	23.2914	23.6162	23.6454
A0A024R2H1;Q01826	DNA-binding protein SATB;DNA-binding protein SATB1	SATB1	1.21032	2.70845	9	9	177	177	85956	35337	303390000	36	activated T cell proliferation;alpha-beta T cell activation;alpha-beta T cell differentiation;anatomical structure development;anatomical structure morphogenesis;apoptosis;biological regulation;biosynthetic process;cartilage development;CD4-positive, alpha-beta T cell activation;CD4-positive, alpha-beta T cell differentiation;CD8-positive, alpha-beta T cell differentiation;cell activation;cell de…	binding;chromatin binding;DNA binding;double-stranded DNA binding;nucleic acid binding;regulatory region DNA binding;regulatory region nucleic acid binding;RNA polymerase II regulatory region DNA binding;RNA polymerase II regulatory region sequence-specific DNA binding;sequence-specific DNA binding;structure-specific DNA binding;transcription regulatory region DNA binding;transcription regulatory…	cell part;chromatin;chromatin remodeling complex;chromosomal part;cytoplasm;heterochromatin;histone deacetylase complex;intracellular membrane-bounded organelle;intracellular organelle;intracellular organelle part;intracellular part;macromolecular complex;membrane-bounded organelle;nuclear body;nuclear chromatin;nuclear chromosome part;nuclear heterochromatin;nuclear matrix;nuclear part;nucleopla…	25.0773	25.3161	25.0271	25.6787	26.1776	26.2241	26.6064	26.9324
Q8TDH9;A0A0D9SEU2;A0A0A0MTN6;G5E931;H3BN57	Biogenesis of lysosome-related organelles complex 1 subunit 5	BLOC1S5;BLOC1S5-TXNDC5	1.20763	1.51273	2	2	16	16	21609	70993	8984000	8	anatomical structure morphogenesis;anterograde axon cargo transport;anterograde synaptic vesicle transport;axon cargo transport;biological regulation;cell projection organization;cellular component movement;cellular component organization;cellular component organization at cellular level;cellular component organization or biogenesis;cellular component organization or biogenesis at cellular level;…		BLOC complex;BLOC-1 complex;cell part;cytoplasmic membrane-bounded vesicle;cytoplasmic part;cytoplasmic vesicle;cytosolic part;intracellular membrane-bounded organelle;intracellular organelle;intracellular part;macromolecular complex;membrane-bounded organelle;membrane-bounded vesicle;organelle;protein complex;transport vesicle;vesicle	20.0841	20.3984	19.4764	20.6662	20.6259	22.2125	21.5893	21.028
B4DPV7			1.20662	3.25684	4	4	63	63	92018	26158	171570000	22	amine metabolic process;amino acid activation;carboxylic acid metabolic process;cellular amine metabolic process;cellular amino acid metabolic process;cellular ketone metabolic process;cellular macromolecule metabolic process;cellular metabolic process;cellular nitrogen compound metabolic process;cellular process;cysteinyl-tRNA aminoacylation;macromolecule metabolic process;metabolic process;ncRN…	adenyl nucleotide binding;adenyl ribonucleotide binding;aminoacyl-tRNA ligase activity;ATP binding;binding;catalytic activity;cysteine-tRNA ligase activity;ligase activity;ligase activity, forming aminoacyl-tRNA and related compounds;ligase activity, forming carbon-oxygen bonds;nucleotide binding;purine nucleotide binding;purine ribonucleoside triphosphate binding;purine ribonucleotide binding;ri…		24.1962	24.4901	24.3456	24.765	25.3051	25.8727	25.5838	25.8617
J3KTF8;V9HWE8;J3QQX2;P52565;J3KRE2;J3KS60;J3QW41;A0A0S2Z3D9;J3KRY1	Rho GDP-dissociation inhibitor 1	ARHGDIA;HEL-S-47e	1.20573	3.12373	7	7	446	446	21517	84101	1306500000	78	biological regulation;cell surface receptor linked signaling pathway;cellular component movement;cellular process;cellular response to stimulus;enzyme linked receptor protein signaling pathway;intracellular signal transduction;negative regulation of apoptosis;negative regulation of axonogenesis;negative regulation of biological process;negative regulation of cell adhesion;negative regulation of c…	enzyme activator activity;enzyme regulator activity;GDP-dissociation inhibitor activity;GTPase activator activity;GTPase regulator activity;nucleoside-triphosphatase regulator activity;Rho GDP-dissociation inhibitor activity;small GTPase regulator activity	cell part;cytoplasm;cytoplasmic part;cytoskeleton;cytosol;extracellular membrane-bounded organelle;extracellular organelle;extracellular region part;extracellular vesicular exosome;immunological synapse;intracellular non-membrane-bounded organelle;intracellular organelle;intracellular part;membrane part;membrane-bounded organelle;membrane-bounded vesicle;non-membrane-bounded organelle;organelle;p…	27.5559	27.1668	27.0045	27.5602	28.3809	28.2738	28.589	28.8667
Q7Z2W4;A8K9U6;Q05DV5	Zinc finger CCCH-type antiviral protein 1	ZC3HAV1	1.20452	0.510638	1	1	2	2	10143	59434	193630000	23	biological regulation;defense response;defense response to virus;immune effector process;immune response;immune system process;innate immune response;multi-organism process;negative regulation of biological process;negative regulation of reproductive process;negative regulation of viral genome replication;negative regulation of viral reproduction;positive regulation of biological process;positive…	binding;catalytic activity;cation binding;ion binding;metal ion binding;NAD+ ADP-ribosyltransferase activity;transferase activity;transferase activity, transferring glycosyl groups;transferase activity, transferring pentosyl groups	cell part;cytoplasm;cytoplasmic part;Golgi apparatus;intracellular membrane-bounded organelle;intracellular organelle;intracellular part;membrane-bounded organelle;nucleus;organelle	25.3317	23.7167	23.8015	23.2381	25.4632	23.4695	24.076	27.8974
B4DKS1;K7ENU1;K7EKG9;Q14CW9;K7EJK2	Ataxin-7-like protein 3	ATXN7L3	1.20102	0.971823	2	2	271	271	1404	30272	5095200	3	biological regulation;biosynthetic process;cellular biosynthetic process;cellular component organization;cellular component organization at cellular level;cellular component organization or biogenesis;cellular component organization or biogenesis at cellular level;cellular macromolecule biosynthetic process;cellular macromolecule metabolic process;cellular metabolic process;cellular nitrogen comp…	binding;cation binding;ion binding;ligand-dependent nuclear receptor transcription coactivator activity;metal ion binding;protein binding transcription factor activity;transcription coactivator activity;transcription cofactor activity;transcription factor binding transcription factor activity;transition metal ion binding;zinc ion binding	cell part;DUBm complex;histone acetyltransferase complex;intracellular organelle part;intracellular part;macromolecular complex;nuclear part;nucleoplasm part;organelle part;protein complex;SAGA complex;SAGA-type complex	19.9749	20.3663	19.9005	20.1934	19.9549	20.636	22.7308	21.9175
Q96AE4;E9PEB5;B4DT31;Q6PJY1	Far upstream element-binding protein 1	FUBP1	1.19948	0.538945	1	1	33	33	6756	29146	21361000	6	biological regulation;biosynthetic process;cellular biosynthetic process;cellular macromolecule biosynthetic process;cellular macromolecule metabolic process;cellular metabolic process;cellular nitrogen compound metabolic process;cellular process;macromolecule biosynthetic process;macromolecule metabolic process;metabolic process;nitrogen compound metabolic process;nucleic acid metabolic process;…	binding;DNA binding;nucleic acid binding;nucleic acid binding transcription factor activity;RNA binding;sequence-specific DNA binding transcription factor activity;single-stranded DNA binding;structure-specific DNA binding	cell part;intracellular membrane-bounded organelle;intracellular organelle;intracellular organelle part;intracellular part;membrane-bounded organelle;nuclear part;nucleoplasm;nucleus;organelle;organelle part	21.8351	19.8418	21.072	22.4631	22.659	20.1547	22.8851	24.3111
Q5U0A0;A0A109NGN6;P28066	Proteasome subunit alpha type;Proteasome subunit alpha type-5	PSMA5	1.19917	0.797448	6	6	27	27	26425	33963	927860000	24	activation of immune response;activation of innate immune response;anaphase-promoting complex-dependent proteasomal ubiquitin-dependent protein catabolic process;antigen processing and presentation;antigen processing and presentation of exogenous antigen;antigen processing and presentation of exogenous peptide antigen;antigen processing and presentation of exogenous peptide antigen via MHC class …	catalytic activity;endopeptidase activity;hydrolase activity;peptidase activity;peptidase activity, acting on L-amino acid peptides;threonine-type endopeptidase activity;threonine-type peptidase activity	cell part;cytoplasm;cytoplasmic part;cytosol;extracellular membrane-bounded organelle;extracellular organelle;extracellular region part;extracellular vesicular exosome;intracellular membrane-bounded organelle;intracellular organelle;intracellular organelle part;intracellular part;macromolecular complex;membrane-bounded organelle;membrane-bounded vesicle;nuclear part;nucleoplasm;nucleus;organelle;…	27.9412	26.7743	26.0058	26.463	28.5155	26.7778	27.1931	29.4946
Q9NZZ3	Charged multivesicular body protein 5	CHMP5	1.19814	1.68539	4	4	265	265	2457	22126	75764000	11	biological regulation;cell cycle process;cellular component organization;cellular component organization at cellular level;cellular component organization or biogenesis;cellular component organization or biogenesis at cellular level;cellular process;cytokinetic cell separation;cytokinetic process;endosome to lysosome transport;endosome transport;establishment of chromosome localization;establishm…		cell part;cytoplasmic part;cytosol;endosomal part;endosome membrane;extracellular membrane-bounded organelle;extracellular organelle;extracellular region part;extracellular vesicular exosome;intracellular membrane-bounded organelle;intracellular organelle;intracellular organelle part;intracellular part;membrane;membrane-bounded organelle;membrane-bounded vesicle;nucleus;organelle;organelle membra…	23.8024	23.0855	23.1596	22.4789	24.5201	23.8398	23.9449	25.0142
A8K383;Q59H30;P18850	Cyclic AMP-dependent transcription factor ATF-6 alpha;Processed cyclic AMP-dependent transcription factor ATF-6 alpha	ATF6	1.19772	2.85603	7	7	145	145	74593	25838	62115000	17	biological regulation;biosynthetic process;cellular biosynthetic process;cellular macromolecule biosynthetic process;cellular macromolecule metabolic process;cellular metabolic process;cellular nitrogen compound metabolic process;cellular process;cellular protein metabolic process;cellular response to chemical stimulus;cellular response to organic substance;cellular response to stimulus;cellular …	binding;cAMP response element binding;DNA binding;nucleic acid binding;nucleic acid binding transcription factor activity;protein binding;protein binding transcription factor activity;protein dimerization activity;protein heterodimerization activity;regulatory region DNA binding;regulatory region nucleic acid binding;RNA polymerase II regulatory region DNA binding;RNA polymerase II regulatory reg…	cell part;cytoplasmic part;endoplasmic reticulum;endoplasmic reticulum membrane;endoplasmic reticulum part;envelope;Golgi apparatus;Golgi apparatus part;Golgi membrane;integral to endoplasmic reticulum membrane;integral to membrane;integral to organelle membrane;intracellular membrane-bounded organelle;intracellular organelle;intracellular organelle part;intracellular part;intrinsic to endoplasmi…	22.8231	23.0657	22.5663	23.1299	23.6095	24.2912	24.3762	24.099
A0A087WWJ1;Q1L838;P52701	DNA mismatch repair protein Msh6	MSH6;GTBP	1.1962	0.731795	1	1	12	12	12112	27046	3286300	2	B cell activation;B cell activation involved in immune response;biological regulation;cell activation;cell activation involved in immune response;cell cycle process;cellular macromolecule metabolic process;cellular metabolic process;cellular nitrogen compound metabolic process;cellular process;cellular response to stimulus;cellular response to stress;determination of adult lifespan;DNA damage res…	adenyl nucleotide binding;adenyl ribonucleotide binding;ATP binding;ATPase activity;ATPase activity, coupled;binding;catalytic activity;chromatin binding;damaged DNA binding;DNA binding;DNA-dependent ATPase activity;double-stranded DNA binding;guanine/thymine mispair binding;histone binding;hydrolase activity;hydrolase activity, acting on acid anhydrides;hydrolase activity, acting on acid anhydri…	cell part;chromatin;chromosomal part;chromosome;cytoplasm;cytoplasmic part;Golgi apparatus;intracellular membrane-bounded organelle;intracellular non-membrane-bounded organelle;intracellular organelle;intracellular organelle part;intracellular part;macromolecular complex;membrane;membrane-bounded organelle;mismatch repair complex;MutSalpha complex;non-membrane-bounded organelle;nuclear chromatin;…	19.3663	19.6715	19.4662	19.8207	19.7913	19.1522	22.5982	21.5677
A0A024R542;Q9C0C2;B3KXS7	182 kDa tankyrase-1-binding protein	TNKS1BP1	1.19609	3.83817	14	14	118	118	18179	44581	68446000	30	anatomical structure homeostasis;biological regulation;biosynthetic process;catabolic process;cellular biosynthetic process;cellular catabolic process;cellular component organization;cellular component organization at cellular level;cellular component organization or biogenesis;cellular component organization or biogenesis at cellular level;cellular macromolecule biosynthetic process;cellular mac…	ankyrin binding;binding;cytoskeletal protein binding;enzyme binding;protein binding	CCR4-NOT complex;cell part;chromatin;chromosomal part;cytoplasm;cytoplasmic part;cytoskeleton;cytosol;heterochromatin;intracellular membrane-bounded organelle;intracellular non-membrane-bounded organelle;intracellular organelle;intracellular organelle part;intracellular part;macromolecular complex;membrane;membrane-bounded organelle;non-membrane-bounded organelle;nuclear chromatin;nuclear chromos…	23.3228	22.8818	23.0567	23.0364	23.9513	24.3548	24.3728	24.4031
A0A087X0M4;Q9BWU0;B4DV74	Kanadaptin	SLC4A1AP	1.1957	1.08646	4	4	73	73	8289	10925	22973000	10			cell part;cytoplasm;intracellular membrane-bounded organelle;intracellular organelle;intracellular organelle part;intracellular part;membrane;membrane-bounded organelle;nuclear part;nucleoplasm;nucleus;organelle;organelle part;plasma membrane	20.137	21.8501	21.9057	21.7901	21.4821	22.8815	23.0679	23.0342
Q59H74;P13612;E7EP60;Q6PJE7	Integrin alpha-4	ITGA4	1.19359	2.34346	9	9	112	112	95157	22982	292700000	34	anatomical structure development;anatomical structure morphogenesis;B cell activation;B cell differentiation;biological adhesion;biological regulation;blood coagulation;blood vessel remodeling;cell activation;cell adhesion;cell differentiation;cell migration;cell morphogenesis;cell morphogenesis involved in differentiation;cell motility;cell surface receptor linked signaling pathway;cell-cell adh…	binding;cation binding;cell adhesion molecule binding;ion binding;metal ion binding;protein binding	adherens junction;alpha4-beta7 integrin complex;anchoring junction;cell junction;cell part;cell surface;cell-cell junction;cell-substrate adherens junction;cell-substrate junction;external side of plasma membrane;extracellular membrane-bounded organelle;extracellular organelle;extracellular region part;extracellular vesicular exosome;focal adhesion;integral to membrane;integrin complex;intrinsic …	24.7378	25.0856	25.3459	25.4634	25.8764	26.6915	26.7507	26.0885
H0YF06;B2RE36;Q9GZT6	Coiled-coil domain-containing protein 90B, mitochondrial	CCDC90B	1.19353	1.50556	2	2	158	158	15479	28856	10565000	3			cell part;cytoplasmic part;integral to membrane;intracellular membrane-bounded organelle;intracellular organelle;intracellular part;intrinsic to membrane;membrane part;membrane-bounded organelle;mitochondrion;organelle	19.8593	20.3234	20.1618	20.6086	21.0451	21.9856	22.1904	20.5061
O75607	Nucleoplasmin-3	NPM3	1.19347	2.00075	3	3	292	292	19343	18077	1386200000	9	biosynthetic process;cellular biosynthetic process;cellular macromolecule biosynthetic process;cellular macromolecule metabolic process;cellular metabolic process;cellular nitrogen compound metabolic process;cellular process;macromolecule biosynthetic process;macromolecule metabolic process;metabolic process;ncRNA metabolic process;ncRNA processing;nitrogen compound metabolic process;nucleic acid…		cell part;intracellular non-membrane-bounded organelle;intracellular organelle;intracellular organelle part;intracellular part;non-membrane-bounded organelle;nuclear part;nucleolus;organelle;organelle part	27.4149	27.137	28.0174	27.4675	27.9647	29.2183	28.8155	28.8122
Q7RTQ9;Q7RTQ7;G5E9S8;G3V2E7;B5BU63;F8W6L3;B4DGB3;Q7RTQ8;Q7RTQ2;G3V3H3;Q7RTQ1;Q7RTQ0;G3V5R9;Q7RTP8;E7EVH7;Q07866;Q7RTQ4;B4DS14;H0YJU9;H0YJL0;H0YJT3	Kinesin light chain 1	KNS2;KLC1	1.19328	3.04966	7	2	149	39	61201	24579	165360000	16	antigen processing and presentation;antigen processing and presentation of exogenous antigen;antigen processing and presentation of exogenous peptide antigen;antigen processing and presentation of exogenous peptide antigen via MHC class II;antigen processing and presentation of peptide antigen;antigen processing and presentation of peptide antigen via MHC class II;antigen processing and presentat…	catalytic activity;hydrolase activity;hydrolase activity, acting on acid anhydrides;hydrolase activity, acting on acid anhydrides, in phosphorus-containing anhydrides;microtubule motor activity;motor activity;nucleoside-triphosphatase activity;pyrophosphatase activity	axon;cell body;cell part;cell projection;cell projection part;ciliary rootlet;cilium part;cytoplasmic membrane-bounded vesicle;cytoplasmic part;cytoplasmic vesicle;cytoskeletal part;cytosol;growth cone;intracellular membrane-bounded organelle;intracellular organelle;intracellular organelle part;intracellular part;kinesin complex;macromolecular complex;membrane;membrane-bounded organelle;membrane-…	24.12	24.4328	23.9627	24.5505	25.1726	25.7881	25.5933	25.2851
A8K5D9;A0A024RA49;Q9NQW6;B4DSL6	Actin-binding protein anillin	ANLN	1.1931	2.82747	8	8	114	114	1199	24859	37075000	13	biological regulation;cell cycle cytokinesis;cell cycle phase;cell cycle process;cell differentiation;cellular component assembly;cellular component assembly at cellular level;cellular component organization;cellular component organization at cellular level;cellular component organization or biogenesis;cellular component organization or biogenesis at cellular level;cellular developmental process;…	actin binding;binding;cytoskeletal protein binding;protein binding	actin cytoskeleton;actomyosin contractile ring;cell cortex part;cell division site part;cell part;contractile ring;cytoplasmic part;cytoskeletal part;cytoskeleton;intracellular membrane-bounded organelle;intracellular non-membrane-bounded organelle;intracellular organelle;intracellular organelle part;intracellular part;membrane-bounded organelle;non-membrane-bounded organelle;nuclear part;nucleop…	21.7281	22.169	22.2533	22.2347	22.7673	23.4912	23.5252	23.374
Q53FE5;A0A024QZ81;Q9NVZ3;D6RB24	Adaptin ear-binding coat-associated protein 2	NECAP2	1.19192	1.45416	5	5	323	323	28342	30936	52480000	8	cellular component organization;cellular component organization or biogenesis;cellular membrane organization;cellular process;endocytosis;establishment of localization;establishment of protein localization;membrane invagination;membrane organization;protein transport;transport;vesicle-mediated transport		cell part;clathrin coat;clathrin vesicle coat;coated pit;cytoplasmic part;cytoplasmic vesicle part;intracellular;intracellular organelle part;intracellular part;macromolecular complex;membrane;membrane coat;membrane part;organelle part;plasma membrane;protein complex;vesicle coat	23.0482	22.5311	21.3348	22.5434	23.7301	23.6812	23.9747	22.8392
A0A024QYZ9;Q9P209	Centrosomal protein of 72 kDa	CEP72	1.18938	1.97166	2	2	45	45	71687	12714	39090000	11	cell cycle;cell cycle process;cellular component organization;cellular component organization at cellular level;cellular component organization or biogenesis;cellular component organization or biogenesis at cellular level;cellular localization;cellular macromolecule localization;cellular process;cellular protein complex localization;cellular protein localization;cytoskeleton organization;G2/M tra…		cell part;centrosome;cytoplasmic part;cytoskeletal part;cytosol;intracellular non-membrane-bounded organelle;intracellular organelle;intracellular organelle part;intracellular part;microtubule organizing center;non-membrane-bounded organelle;organelle;organelle part	22.0061	22.2368	22.1282	22.8072	22.7246	23.4519	23.8314	23.928
C3UMV3;C3UMV2;C3UMV4			1.18407	0.649316	1	0	28	0	93288	70216	115830000	19		nucleic acid binding transcription factor activity;sequence-specific DNA binding transcription factor activity	cell part;intracellular membrane-bounded organelle;intracellular organelle;intracellular part;membrane-bounded organelle;nucleus;organelle	25.139	22.7633	22.0076	22.2942	25.6334	23.4196	23.5762	24.3112
X2D546;X2D544;X2D537;X2D4V5;X2D4V3;X2D4U5;X2D4K6;X2D4F2;X2D4E2;X2D4D6;X2D3Z8;X2D3Z7;X2D3Z6;K7WG81;H9E7F7;A0A059QM31;H9E7P8;A0A059RTG7;A0A059QNV4;E2DTL8;A0A1B1PEQ8;H9E7W2;G3CA49;K7WVJ5;H9E7T7;X5C6M5;X5BKA4;X2CK15;X2C841;W8DFH5;W8D4U9;W8D1X2;V9K571;V9JPM6;V9JD22;V9J3S1;U5Z9R9;U5Z487;U3LSI8;T1SWS8;T1Q632;S4STI1;R9Y478;R9Y412;Q9B2U8;Q9B138;Q8WCW3;Q8HNR6;Q8HNR1;Q85KS0;Q7YEH2;Q7Y6M3;Q7Y626;Q6VJJ3;Q6VJD…	Cytochrome c oxidase subunit 2	cox2;COX2;COII;MT-CO2	1.18309	1.0678	3	3	182	182	20548	91075	167610000	18	biosynthetic process;cellular biosynthetic process;cellular macromolecule metabolic process;cellular metabolic process;cellular nitrogen compound metabolic process;cellular process;electron transport chain;gene expression;generation of precursor metabolites and energy;macromolecule metabolic process;metabolic process;mitochondrial electron transport, cytochrome c to oxygen;nitrogen compound metab…	binding;catalytic activity;cation binding;cation transmembrane transporter activity;copper ion binding;cytochrome-c oxidase activity;heme-copper terminal oxidase activity;hydrogen ion transmembrane transporter activity;inorganic cation transmembrane transporter activity;ion binding;ion transmembrane transporter activity;metal ion binding;monovalent inorganic cation transmembrane transporter activ…	cell part;cytoplasmic part;extracellular membrane-bounded organelle;extracellular organelle;extracellular region part;extracellular vesicular exosome;integral to membrane;intracellular membrane-bounded organelle;intracellular organelle;intracellular organelle part;intracellular part;intrinsic to membrane;macromolecular complex;membrane;membrane part;membrane-bounded organelle;membrane-bounded ves…	25.2065	22.7009	24.2019	24.9145	25.3875	25.0839	25.5957	25.6891
A8K1M4;Q9H081	Protein MIS12 homolog	MIS12	1.18256	1.05336	1	1	39	39	2411	16425	17908000	1	biological regulation;cell cycle;cell cycle phase;cell cycle process;cell division;cellular component assembly;cellular component assembly at cellular level;cellular component organization;cellular component organization at cellular level;cellular component organization or biogenesis;cellular component organization or biogenesis at cellular level;cellular macromolecular complex assembly;cellular …		cell part;chromosomal part;chromosome, centromeric region;cytoplasmic part;cytosol;intracellular membrane-bounded organelle;intracellular organelle;intracellular organelle part;intracellular part;macromolecular complex;membrane-bounded organelle;MIS12/MIND type complex;nucleus;organelle;organelle part;protein complex	20.9015	21.1722	21.2776	21.3558	21.3926	21.8768	22.154	24.0138
F2Z2Y4;V9HWC3;O00764	Pyridoxal kinase	PDXK;HEL-S-1a	1.18154	1.62465	1	1	51	51	30638	33084	15028000	3	biosynthetic process;cell proliferation;cellular biosynthetic process;cellular metabolic compound salvage;cellular metabolic process;cellular process;coenzyme biosynthetic process;coenzyme metabolic process;cofactor biosynthetic process;cofactor metabolic process;heterocycle metabolic process;metabolic process;pyridoxal 5'-phosphate salvage;pyridoxal phosphate biosynthetic process;pyridoxal phosp…	adenyl nucleotide binding;adenyl ribonucleotide binding;alkali metal ion binding;ATP binding;binding;catalytic activity;cation binding;cofactor binding;identical protein binding;ion binding;kinase activity;lithium ion binding;magnesium ion binding;metal ion binding;nucleotide binding;phosphotransferase activity, alcohol group as acceptor;potassium ion binding;protein binding;protein dimerization …	cell part;cytoplasm;cytoplasmic part;cytosol;extracellular membrane-bounded organelle;extracellular organelle;extracellular region part;extracellular vesicular exosome;intracellular membrane-bounded organelle;intracellular organelle;intracellular organelle part;intracellular part;membrane-bounded organelle;membrane-bounded vesicle;nuclear part;nucleoplasm;nucleus;organelle;organelle part;vesicle	22.0435	21.9701	20.8997	22.6906	22.7428	23.0596	23.1707	23.357
X6RFL8;A0A024R845;P61106	Ras-related protein Rab-14	RAB14	1.18122	0.820552	5	5	293	293	20409	20262	66011000	7	biological regulation;cell surface receptor linked signaling pathway;cellular component assembly;cellular component assembly at cellular level;cellular component organization;cellular component organization at cellular level;cellular component organization or biogenesis;cellular component organization or biogenesis at cellular level;cellular membrane fusion;cellular membrane organization;cellular…	binding;catalytic activity;cytoskeletal protein binding;GDP binding;GTP binding;GTPase activity;guanyl nucleotide binding;guanyl ribonucleotide binding;hydrolase activity;hydrolase activity, acting on acid anhydrides;hydrolase activity, acting on acid anhydrides, in phosphorus-containing anhydrides;myosin binding;myosin V binding;nucleoside-triphosphatase activity;nucleotide binding;protein bindi…	cell part;clathrin-coated vesicle;coated vesicle;cytoplasmic membrane-bounded vesicle;cytoplasmic part;cytoplasmic vesicle;cytoplasmic vesicle membrane;cytoplasmic vesicle part;cytosol;early endosome;early endosome membrane;endocytic vesicle;endocytic vesicle membrane;endoplasmic reticulum;endosomal part;endosome;endosome membrane;extracellular membrane-bounded organelle;extracellular organelle;e…	23.9835	20.982	22.8642	22.7593	24.8419	23.3074	23.3059	23.8587
H7C593;B4DLK0;Q9H3U5	Major facilitator superfamily domain-containing protein 1	MFSD1	1.17949	1.24936	1	1	115	115	85648	20888	6483400	3	cellular process;establishment of localization;transmembrane transport;transport		cell part;integral to membrane;intrinsic to membrane;membrane part	19.2403	19.3241	20.3047	20.1702	20.0175	20.4655	21.5246	21.7496
K7EIX0;K7ELB8;Q96S99;B4DWN9	Pleckstrin homology domain-containing family F member 1	PLEKHF1	1.17783	0.827737	2	2	28	28	91517	4898	5823100	2	apoptosis;biological regulation;cell death;cellular component organization;cellular component organization at cellular level;cellular component organization or biogenesis;cellular component organization or biogenesis at cellular level;cellular localization;cellular macromolecule localization;cellular membrane organization;cellular process;cellular protein localization;death;endosome organization;…	binding;cation binding;ion binding;lipid binding;metal ion binding;phosphatidylinositol binding;phosphatidylinositol-3-phosphate binding;phosphatidylinositol-4-phosphate binding;phosphatidylinositol-5-phosphate binding;phospholipid binding	cell part;cytoplasmic part;endosomal part;endosome membrane;intracellular membrane-bounded organelle;intracellular organelle;intracellular organelle part;intracellular part;lysosomal membrane;lysosome;lytic vacuole;membrane;membrane-bounded organelle;nucleus;organelle;organelle membrane;organelle part;perinuclear region of cytoplasm;vacuolar membrane;vacuolar part;vacuole	20.8458	20.4969	20.5178	22.4344	20.9456	23.5986	22.2288	22.2332
B4DUD5;P33240;E7EWR4;B3V096;E9PID8	Cleavage stimulation factor subunit 2	CSTF2	1.17718	2.95783	20	12	467	298	58617	22898	1601200000	129	biosynthetic process;cellular biosynthetic process;cellular macromolecule biosynthetic process;cellular macromolecule metabolic process;cellular metabolic process;cellular nitrogen compound metabolic process;cellular process;gene expression;macromolecule biosynthetic process;macromolecule metabolic process;metabolic process;mRNA 3'-end processing;mRNA cleavage;mRNA metabolic process;mRNA polyaden…	binding;nucleic acid binding;nucleotide binding;RNA binding	cell part;cleavage body;intracellular membrane-bounded organelle;intracellular organelle;intracellular organelle part;intracellular part;macromolecular complex;membrane-bounded organelle;mRNA cleavage and polyadenylation specificity factor complex;mRNA cleavage factor complex;nuclear body;nuclear part;nucleoplasm;nucleoplasm part;nucleus;organelle;organelle part;protein complex	27.1025	27.4802	27.7749	27.6613	28.7464	28.7773	28.9183	28.2856
Q6UX04;D6REK3	Peptidyl-prolyl cis-trans isomerase CWC27 homolog	CWC27	1.17631	1.00039	3	3	85	85	53846	88113	10773000	6	cellular macromolecule metabolic process;cellular metabolic process;cellular nitrogen compound metabolic process;cellular process;cellular protein metabolic process;macromolecule metabolic process;macromolecule modification;metabolic process;mRNA metabolic process;mRNA processing;nitrogen compound metabolic process;nuclear mRNA splicing, via spliceosome;nucleic acid metabolic process;nucleobase-c…	catalytic activity;cis-trans isomerase activity;isomerase activity;peptidyl-prolyl cis-trans isomerase activity	catalytic step 2 spliceosome;cell part;intracellular organelle part;intracellular part;macromolecular complex;nuclear part;organelle part;ribonucleoprotein complex;spliceosomal complex	20.2989	20.6995	20.6658	22.1306	20.7816	22.4485	22.5899	22.6799
Q96HR3	Mediator of RNA polymerase II transcription subunit 30	MED30	1.17629	1.09653	2	2	191	191	20277	93289	24444000	3	androgen receptor signaling pathway;biological regulation;biosynthetic process;cellular biosynthetic process;cellular macromolecule metabolic process;cellular metabolic process;cellular nitrogen compound metabolic process;cellular process;cellular response to stimulus;developmental process;gene expression;intracellular receptor mediated signaling pathway;macromolecule metabolic process;metabolic …	binding;hormone receptor binding;ligand-dependent nuclear receptor transcription coactivator activity;nuclear hormone receptor binding;protein binding;protein binding transcription factor activity;receptor activity;receptor binding;RNA polymerase II transcription cofactor activity;RNA polymerase II transcription factor binding transcription factor activity;thyroid hormone receptor binding;transcr…	cell part;intracellular membrane-bounded organelle;intracellular organelle;intracellular organelle part;intracellular part;macromolecular complex;mediator complex;membrane-bounded organelle;nuclear part;nucleoplasm;nucleoplasm part;nucleus;organelle;organelle part;protein complex	21.931	21.9886	20.5185	22.0756	23.1334	23.8054	22.3697	21.9102
B4DLN1			1.17446	0.846341	1	1	77	77	48099	42791	16036000	2	biological regulation;biosynthetic process;cellular biosynthetic process;cellular component disassembly;cellular component disassembly at cellular level;cellular component organization;cellular component organization at cellular level;cellular component organization or biogenesis;cellular component organization or biogenesis at cellular level;cellular macromolecular complex disassembly;cellular m…	binding;nucleic acid binding;RNA binding;structural constituent of ribosome;structural molecule activity	cell part;cytoplasmic part;integral to membrane;intracellular membrane-bounded organelle;intracellular non-membrane-bounded organelle;intracellular organelle;intracellular organelle part;intracellular part;intrinsic to membrane;large ribosomal subunit;macromolecular complex;membrane;membrane part;membrane-bounded organelle;mitochondrial inner membrane;mitochondrial large ribosomal subunit;mitocho…	21.0838	21.3223	21.1489	22.3012	21.7794	22.2552	21.9967	24.5226
Q9NP72;A0A087X163;B7Z5V3;B7Z4P9;Q5W0J0	Ras-related protein Rab-18	RAB18	1.17414	0.849316	5	5	267	267	22977	22748	179280000	20	anatomical structure development;biological regulation;brain development;cellular component organization;cellular component organization at cellular level;cellular component organization or biogenesis;cellular component organization or biogenesis at cellular level;cellular process;cellular response to stimulus;developmental process;endoplasmic reticulum organization;endoplasmic reticulum tubular …	binding;catalytic activity;GDP binding;GTP binding;GTPase activity;guanyl nucleotide binding;guanyl ribonucleotide binding;hydrolase activity;hydrolase activity, acting on acid anhydrides;hydrolase activity, acting on acid anhydrides, in phosphorus-containing anhydrides;nucleoside-triphosphatase activity;nucleotide binding;purine nucleotide binding;purine ribonucleoside triphosphate binding;purin…	cell part;cytoplasmic part;endoplasmic reticulum part;endoplasmic reticulum tubular network;extracellular membrane-bounded organelle;extracellular organelle;extracellular region part;extracellular vesicular exosome;Golgi apparatus;intracellular;intracellular membrane-bounded organelle;intracellular organelle;intracellular organelle part;intracellular part;membrane;membrane-bounded organelle;membr…	24.7574	24.811	24.9038	22.9647	25.3731	24.5614	25.2165	26.9825
O15173;D3DNX8;U3KQM0	Membrane-associated progesterone receptor component 2	PGRMC2	1.1726	2.51902	3	3	103	103	23818	42694	9691800	5	biological regulation;cellular process;cellular response to chemical stimulus;cellular response to endogenous stimulus;cellular response to hormone stimulus;cellular response to organic substance;cellular response to steroid hormone stimulus;cellular response to stimulus;hormone-mediated signaling pathway;regulation of biological process;regulation of cellular process;response to chemical stimulu…	binding;cation binding;heme binding;ion binding;iron ion binding;ligand-dependent nuclear receptor activity;lipid binding;metal ion binding;molecular transducer activity;receptor activity;signal transducer activity;signaling receptor activity;steroid binding;steroid hormone receptor activity;tetrapyrrole binding;transition metal ion binding	cell part;endomembrane system;integral to membrane;intrinsic to membrane;membrane;membrane part	20.0751	19.8974	19.5095	19.8804	21.4601	21.2903	20.7243	20.5782
H0YK49;A0A0S2Z3M4;A0A0S2Z3L0;P13804;H0YL12;H0YNX6;H0YLU7;H0YKF0	Electron transfer flavoprotein subunit alpha, mitochondrial	ETFA	1.16975	1.80943	6	6	371	371	2416	31879	171990000	22	cellular metabolic process;cellular process;electron transport chain;generation of precursor metabolites and energy;metabolic process;oxidation-reduction process;respiratory electron transport chain;small molecule metabolic process	binding;catalytic activity;coenzyme binding;cofactor binding;electron carrier activity;flavin adenine dinucleotide binding;oxidoreductase activity	cell part;cytoplasmic part;extracellular membrane-bounded organelle;extracellular organelle;extracellular region part;extracellular vesicular exosome;intracellular membrane-bounded organelle;intracellular organelle;intracellular organelle lumen;intracellular organelle part;intracellular part;membrane-bounded organelle;membrane-bounded vesicle;membrane-enclosed lumen;mitochondrial matrix;mitochond…	24.1933	24.2301	24.8473	24.4218	24.9988	25.356	25.5377	26.4789
H7C4C5	Microtubule-associated protein	MAP4	1.1688	1.46343	1	1	26	26	50865	56025	26142000	5			cell part;cytoplasm;cytoskeletal part;intracellular organelle part;intracellular part;macromolecular complex;microtubule;organelle part;protein complex	21.3454	22.132	22.1275	22.2777	22.2149	22.9863	23.3525	24.0042
B5B2P4;Q13469	Nuclear factor of activated T-cells, cytoplasmic 2	NFATC2	1.16074	2.01804	6	2	106	35	7706	10575	47567000	15	activation of immune response;activation of innate immune response;antigen receptor-mediated signaling pathway;B cell receptor signaling pathway;biological regulation;cell migration;cell motility;cell surface receptor linked signaling pathway;cellular component movement;cellular process;cellular response to stimulus;cellular response to stress;cytokine production;defense response;immune response;…	binding;core promoter proximal region DNA binding;core promoter proximal region sequence-specific DNA binding;DNA binding;nucleic acid binding;nucleic acid binding transcription factor activity;regulatory region DNA binding;regulatory region nucleic acid binding;RNA polymerase II core promoter proximal region sequence-specific DNA binding;RNA polymerase II core promoter proximal region sequence-s…	actin cytoskeleton;cell part;cytoplasm;cytoplasmic part;cytoskeleton;cytosol;intracellular membrane-bounded organelle;intracellular non-membrane-bounded organelle;intracellular organelle;intracellular organelle part;intracellular part;macromolecular complex;membrane;membrane-bounded organelle;non-membrane-bounded organelle;nuclear part;nucleoplasm;nucleus;organelle;organelle part;plasma membrane;…	22.3208	22.2827	22.7097	23.1969	23.342	23.5272	24.3574	23.9265
B7Z307;A0A140VK59;Q96BY9;E5RHW0;H0YBH7;E5RFJ9	Store-operated calcium entry-associated regulatory factor	SARAF	1.15837	2.26345	7	7	30	30	33366	36349	31728000	11	calcium ion transport;cation transport;divalent inorganic cation transport;divalent metal ion transport;establishment of localization;ion transport;metal ion transport;transport		cell part;cytoplasmic part;endoplasmic reticulum part;integral to endoplasmic reticulum membrane;integral to membrane;integral to organelle membrane;intracellular organelle part;intracellular part;intrinsic to endoplasmic reticulum membrane;intrinsic to membrane;intrinsic to organelle membrane;membrane part;organelle part	22.5892	21.8011	22.4407	22.5056	23.8754	23.6327	23.55	22.912
B8ZZF8;A0A090N8Y5;Q9Y4Y9	U6 snRNA-associated Sm-like protein LSm5	LSM5	1.15734	1.30911	1	1	297	297	70202	94296	182080000	7	catabolic process;cellular catabolic process;cellular macromolecule catabolic process;cellular macromolecule metabolic process;cellular metabolic process;cellular nitrogen compound metabolic process;cellular process;exonucleolytic nuclear-transcribed mRNA catabolic process involved in deadenylation-dependent decay;gene expression;macromolecule catabolic process;macromolecule metabolic process;met…	binding;nucleic acid binding;RNA binding	cell part;cytoplasmic part;cytosol;intracellular membrane-bounded organelle;intracellular organelle;intracellular organelle part;intracellular part;macromolecular complex;membrane-bounded organelle;nuclear part;nucleus;organelle;organelle part;ribonucleoprotein complex;spliceosomal complex	24.761	24.0735	24.688	24.8006	24.4989	25.7908	26.1539	26.5087
A4VCI1;Q96NY3;Q96KC8	DnaJ homolog subfamily C member 1	DNAJC1	1.15661	3.04973	2	2	112	112	25058	47923	26220000	4	biological regulation;cellular macromolecule metabolic process;cellular metabolic process;cellular process;cellular protein metabolic process;macromolecule metabolic process;metabolic process;negative regulation of biological process;negative regulation of cellular metabolic process;negative regulation of cellular process;negative regulation of cellular protein metabolic process;negative regulati…	ATPase activator activity;ATPase regulator activity;binding;chromatin binding;DNA binding;enzyme activator activity;enzyme regulator activity;nucleic acid binding;nucleoside-triphosphatase regulator activity	cell part;cytoplasmic part;endoplasmic reticulum;endoplasmic reticulum membrane;endoplasmic reticulum part;integral to membrane;intracellular membrane-bounded organelle;intracellular organelle;intracellular organelle part;intracellular part;intrinsic to membrane;membrane;membrane part;membrane-bounded organelle;nuclear membrane;nuclear part;nucleus;organelle;organelle membrane;organelle part;plas…	21.2076	21.7316	21.8963	21.9811	23.0869	22.7683	22.7536	22.8342
Q86YC3	Negative regulator of reactive oxygen species	NRROS	1.15645	1.69842	1	1	13	13	76365	15018	20880000	6	cellular metabolic process;cellular process;defense response;immune response;immune system process;inflammatory response;innate immune response;metabolic process;reactive oxygen species metabolic process;response to stimulus;response to stress;response to wounding;superoxide metabolic process		cell part;cytoplasmic part;endoplasmic reticulum;endoplasmic reticulum membrane;endoplasmic reticulum part;integral to membrane;intracellular membrane-bounded organelle;intracellular organelle;intracellular organelle part;intracellular part;intrinsic to membrane;membrane;membrane part;membrane-bounded organelle;organelle;organelle membrane;organelle part;plasma membrane	21.2257	21.3474	21.6096	21.8363	21.7101	23.0339	23.26	22.6409
B4DZG6;Q9BTX1	Nucleoporin NDC1	NDC1	1.1564	1.26742	8	8	33	33	37928	61413	298260000	32	cell cycle process;cellular component assembly;cellular component assembly at cellular level;cellular component organization;cellular component organization at cellular level;cellular component organization or biogenesis;cellular component organization or biogenesis at cellular level;cellular localization;cellular macromolecular complex assembly;cellular macromolecular complex subunit organizatio…	structural constituent of nuclear pore;structural molecule activity	cell part;cytoplasm;intracellular organelle part;intracellular part;macromolecular complex;membrane;membrane part;nuclear membrane;nuclear part;nuclear pore;organelle membrane;organelle part;pore complex;protein complex	25.5462	24.1356	25.1521	26.0838	25.712	26.274	26.8028	26.7546
A0A024R0X0;Q9UMZ2	Synergin gamma	AP1GBP1;SYNRG	1.15637	1.07374	7	7	88	88	14064	39896	54586000	15	cellular component organization;cellular component organization or biogenesis;cellular membrane organization;cellular process;endocytosis;establishment of localization;establishment of localization in cell;establishment of protein localization;intracellular protein transport;intracellular transport;membrane invagination;membrane organization;protein transport;transport;vesicle-mediated transport		AP-1 adaptor complex;AP-type membrane coat adaptor complex;cell part;clathrin adaptor complex;cytoplasm;cytoplasmic part;cytoplasmic vesicle part;Golgi apparatus;Golgi apparatus part;intracellular membrane-bounded organelle;intracellular organelle;intracellular organelle part;intracellular part;macromolecular complex;membrane part;membrane-bounded organelle;organelle;organelle part;protein complex	21.8974	22.2317	23.0184	22.8888	23.8331	24.1729	24.4216	22.2343
O43290;B4DDH9	U4/U6.U5 tri-snRNP-associated protein 1	SART1	1.15473	2.27631	11	11	16	16	90254	39627	136120000	29	biological regulation;cell cycle arrest;cell cycle process;cellular component assembly;cellular component assembly at cellular level;cellular component organization;cellular component organization at cellular level;cellular component organization or biogenesis;cellular component organization or biogenesis at cellular level;cellular macromolecular complex assembly;cellular macromolecular complex s…		Cajal body;catalytic step 2 spliceosome;cell part;cytoplasm;cytoplasmic part;cytosol;Golgi apparatus;intracellular membrane-bounded organelle;intracellular organelle;intracellular organelle part;intracellular part;macromolecular complex;membrane-bounded organelle;nuclear body;nuclear part;nucleoplasm;nucleoplasm part;organelle;organelle part;ribonucleoprotein complex;small nuclear ribonucleoprote…	23.4672	24.3433	23.9928	23.7413	24.6678	25.2837	25.464	24.7482
K7EJH0;K7EMX1;K7EJV2;K7ESQ2;K7ERQ7;A0A0A0MSN0;B4E086;Q8NBT2	Kinetochore protein Spc24	SPC24	1.15442	1.02555	2	2	107	107	19001	43273	19721000	4	biological regulation;cell cycle;cell cycle phase;cell cycle process;cell division;cellular component organization;cellular component organization at cellular level;cellular component organization or biogenesis;cellular component organization or biogenesis at cellular level;cellular process;cellular response to stimulus;intracellular signal transduction;mitosis;mitotic cell cycle;nuclear division…		cell part;chromosomal part;condensed chromosome kinetochore;cytoplasmic part;cytosol;intracellular membrane-bounded organelle;intracellular non-membrane-bounded organelle;intracellular organelle;intracellular organelle part;intracellular part;kinetochore;macromolecular complex;membrane-bounded organelle;Ndc80 complex;non-membrane-bounded organelle;nuclear part;nucleolus;nucleus;organelle;organell…	20.6061	21.3639	21.9574	22.8994	21.9297	23.0349	23.0708	23.409
Q9UBL0	cAMP-regulated phosphoprotein 21	ARPP21	1.15291	1.8286	5	5	81	81	89195	19067	60709000	24	cellular process;cellular response to heat;cellular response to stimulus;cellular response to stress;response to abiotic stimulus;response to heat;response to stimulus;response to stress;response to temperature stimulus	binding;nucleic acid binding	cell part;cytoplasm;intracellular part	22.1055	22.638	22.5759	23.2802	23.52	24.2179	24.203	23.2703
E9PSH8;P07766	T-cell surface glycoprotein CD3 epsilon chain	CD3E	1.15286	3.86723	3	3	124	124	22563	10742	308420000	18	activation of immune response;antigen receptor-mediated signaling pathway;biological regulation;cell activation;cell surface receptor linked signaling pathway;cellular component assembly;cellular component assembly at cellular level;cellular component organization;cellular component organization at cellular level;cellular component organization or biogenesis;cellular component organization or bio…	binding;enzyme binding;kinase binding;molecular transducer activity;protein binding;protein complex binding;protein complex scaffold;protein dimerization activity;protein domain specific binding;protein heterodimerization activity;protein kinase binding;receptor activity;receptor binding;receptor signaling complex scaffold activity;receptor signaling protein activity;SH3 domain binding;signal tra…	alpha-beta T cell receptor complex;cell junction;cell part;cell-cell junction;external side of plasma membrane;immunological synapse;integral to membrane;integral to plasma membrane;intrinsic to membrane;intrinsic to plasma membrane;macromolecular complex;membrane;membrane part;plasma membrane;plasma membrane part;protein complex;receptor complex;T cell receptor complex	25.2823	25.0841	25.3188	25.5594	26.3547	26.3888	26.7391	26.3735
A0A024QZW3;Q96S59;A0A024R014	Ran-binding protein 9	RANBP9	1.15159	0.442834	7	7	129	129	77846	92729	148830000	23	axon guidance;biological regulation;cellular component assembly;cellular component organization;cellular component organization at cellular level;cellular component organization or biogenesis;cellular component organization or biogenesis at cellular level;cellular process;chemotaxis;cytoskeleton organization;locomotion;macromolecular complex assembly;macromolecular complex subunit organization;mi…	binding;enzyme binding;GTPase binding;protein binding;Ran GTPase binding;Ras GTPase binding;small GTPase binding	cell part;cytoplasmic part;cytoskeletal part;cytosol;intracellular membrane-bounded organelle;intracellular organelle;intracellular organelle part;intracellular part;macromolecular complex;membrane-bounded organelle;microtubule associated complex;nucleus;organelle;organelle part;protein complex	24.9446	23.12	22.9116	23.0786	25.4499	22.6142	23.3135	27.2837
Q9HCJ0;A0A1B0GU24	Trinucleotide repeat-containing gene 6C protein	TNRC6C	1.1495	1.16086	8	8	73	73	17596	29612	64777000	18	anatomical structure development;anatomical structure formation involved in morphogenesis;biological regulation;cell surface receptor linked signaling pathway;cellular process;cellular response to chemical stimulus;cellular response to fibroblast growth factor stimulus;cellular response to growth factor stimulus;cellular response to organic substance;cellular response to stimulus;defense response…	binding;nucleic acid binding;nucleotide binding;RNA binding	cell part;cytoplasmic part;cytosol;intracellular part	22.5444	23.2398	23.2305	23.8169	23.0556	24.5149	25.0983	24.7606
B2R649;A8KA27;A0A024RAP2;P04035	3-hydroxy-3-methylglutaryl coenzyme A reductase;3-hydroxy-3-methylglutaryl-coenzyme A reductase	HMGCR	1.14947	1.62604	2	2	26	26	97461	54162	10056000	7	aging;alcohol metabolic process;associative learning;behavior;biological regulation;biosynthetic process;cell differentiation;cellular biosynthetic process;cellular component assembly;cellular component organization;cellular component organization or biogenesis;cellular developmental process;cellular ketone metabolic process;cellular lipid metabolic process;cellular metabolic process;cellular nit…	binding;catalytic activity;coenzyme binding;cofactor binding;hydroxymethylglutaryl-CoA reductase (NADPH) activity;hydroxymethylglutaryl-CoA reductase activity;NADP binding;NADPH binding;nucleotide binding;oxidoreductase activity;oxidoreductase activity, acting on CH-OH group of donors;oxidoreductase activity, acting on the CH-OH group of donors, NAD or NADP as acceptor	cell part;cytoplasmic part;endoplasmic reticulum;endoplasmic reticulum membrane;endoplasmic reticulum part;integral to membrane;intracellular membrane-bounded organelle;intracellular organelle;intracellular organelle part;intracellular part;intrinsic to membrane;membrane;membrane part;membrane-bounded organelle;microbody;microbody membrane;microbody part;organelle;organelle membrane;organelle par…	20.2132	20.5533	20.5332	21.2622	20.8761	21.9182	22.1873	22.1782
B4DDC8;B3KXL8;Q6IAU5;B2R665;O15355;Q96IN7;Q59GB2	Protein phosphatase 1G	PPM1G	1.14723	2.69248	17	17	41	41	56134	16335	671820000	77	biological regulation;cell cycle arrest;cell cycle process;cellular macromolecule metabolic process;cellular metabolic process;cellular process;cellular protein metabolic process;dephosphorylation;macromolecule metabolic process;macromolecule modification;metabolic process;negative regulation of biological process;negative regulation of cell cycle;negative regulation of cellular process;peptidyl-…	binding;catalytic activity;cation binding;hydrolase activity;hydrolase activity, acting on ester bonds;ion binding;metal ion binding;phosphatase activity;phosphoprotein phosphatase activity;phosphoric ester hydrolase activity;protein serine/threonine phosphatase activity	cell part;cytoplasm;intracellular membrane-bounded organelle;intracellular organelle;intracellular organelle part;intracellular part;membrane-bounded organelle;nuclear part;nucleoplasm;nucleus;organelle;organelle part	26.1344	26.4198	26.3307	26.8153	27.0998	27.7856	27.8392	27.5644
F5H5N2;B4DNC9;B4DDI1;B3KQ30;Q9H1K1;B1P7G3;A0A024RBI3	Iron-sulfur cluster assembly enzyme ISCU, mitochondrial	ISCU;NIFUN	1.14372	1.11902	3	3	221	221	1664	6504	21959000	2	biological regulation;biosynthetic process;cation homeostasis;cellular biosynthetic process;cellular cation homeostasis;cellular chemical homeostasis;cellular homeostasis;cellular ion homeostasis;cellular iron ion homeostasis;cellular metabolic process;cellular metal ion homeostasis;cellular process;chemical homeostasis;cofactor biosynthetic process;cofactor metabolic process;homeostatic process;…	2 iron, 2 sulfur cluster binding;4 iron, 4 sulfur cluster binding;binding;cation binding;ferrous iron binding;ion binding;iron ion binding;iron-sulfur cluster binding;metal cluster binding;metal ion binding;protein binding;protein complex scaffold;structural molecule activity;transition metal ion binding	cell part;cytoplasm;cytoplasmic part;cytosol;intracellular membrane-bounded organelle;intracellular organelle;intracellular organelle lumen;intracellular organelle part;intracellular part;membrane-bounded organelle;membrane-enclosed lumen;mitochondrial matrix;mitochondrial part;mitochondrion;nucleus;organelle;organelle lumen;organelle part	21.0047	21.4359	20.8995	22.5977	22.6913	23.6406	22.1261	22.0548
Q96HQ2	CDKN2AIP N-terminal-like protein	CDKN2AIPNL	1.14359	0.880917	2	2	241	241	13196	62112	85660000	10				22.0226	23.6306	24.1643	23.7877	23.6814	24.7279	24.0316	25.7386
B4DGM9;O14656;B3KPA1	Torsin-1A	TOR1A	1.14054	0.493852	2	2	36	36	40785	35983	4785900	1	biological adhesion;biological regulation;catabolic process;cell adhesion;cell migration;cell motility;cell projection organization;cellular catabolic process;cellular component assembly;cellular component movement;cellular component organization;cellular component organization at cellular level;cellular component organization or biogenesis;cellular component organization or biogenesis at cellula…	adenyl nucleotide binding;adenyl ribonucleotide binding;ATP binding;ATPase activity;binding;catalytic activity;cytoskeletal protein binding;hydrolase activity;hydrolase activity, acting on acid anhydrides;hydrolase activity, acting on acid anhydrides, in phosphorus-containing anhydrides;kinesin binding;nucleoside-triphosphatase activity;nucleotide binding;protein binding;purine nucleotide binding…	cell junction;cell part;cell projection part;clathrin-coated vesicle;coated vesicle;cytoplasmic membrane-bounded vesicle;cytoplasmic part;cytoplasmic vesicle;cytoplasmic vesicle membrane;cytoplasmic vesicle part;cytoskeleton;endoplasmic reticulum;endoplasmic reticulum lumen;endoplasmic reticulum part;envelope;extracellular membrane-bounded organelle;extracellular organelle;extracellular region pa…	19.6723	18.4859	22.2227	20.5859	21.8006	22.1724	22.2527	19.3033
E7EPW2;P82663	28S ribosomal protein S25, mitochondrial	MRPS25	1.13985	1.09809	2	2	236	236	12946	49698	14201000	3	biosynthetic process;cellular biosynthetic process;cellular component disassembly;cellular component disassembly at cellular level;cellular component organization;cellular component organization at cellular level;cellular component organization or biogenesis;cellular component organization or biogenesis at cellular level;cellular macromolecular complex disassembly;cellular macromolecular complex …		cell part;cytoplasmic part;intracellular membrane-bounded organelle;intracellular non-membrane-bounded organelle;intracellular organelle;intracellular organelle part;intracellular part;macromolecular complex;membrane;membrane-bounded organelle;mitochondrial inner membrane;mitochondrial membrane;mitochondrial part;mitochondrion;non-membrane-bounded organelle;organelle;organelle inner membrane;orga…	22.1486	22.0608	21.0319	21.1798	22.1519	22.5956	24.0787	22.1543
Q6P582;B8ZZ87;Q6NZ67	Mitotic-spindle organizing protein 2A;Mitotic-spindle organizing protein 2B	MZT2A;MZT2B	1.13513	3.17375	3	3	361	361	1622	91935	18402000	10			cell part;centrosome;cytoplasmic part;cytoskeletal part;gamma-tubulin complex;gamma-tubulin large complex;gamma-tubulin ring complex;intracellular non-membrane-bounded organelle;intracellular organelle;intracellular organelle part;intracellular part;macromolecular complex;microtubule organizing center;microtubule organizing center part;non-membrane-bounded organelle;organelle;organelle part;prote…	20.9311	20.9739	21.1055	21.5451	22.4589	21.9655	22.3172	22.3546
[truncated: 4,478 more rows]

## Sheet: Huh7 (TG42_DMSO)
Majority Protein IDs	Protein Names	Gene names	log2 fold enrichment	-log10 p-value	Razor + unique peptides	Unique peptides	Unique + razor sequence coverage [%]	Unique sequence coverage [%]	Molecular weight [kDa]	Score	Intensity	MS/MS count	GOBP name	GOMF name	GOCC name	log2 LFQ intensity DMSO1	log2 LFQ intensity DMSO2	log2 LFQ intensity DMSO3	log2 LFQ intensity DMSO4	log2 LFQ intensity DMSO5	log2 LFQ intensity DMSO6	log2 LFQ intensity DMSO7	log2 LFQ intensity DMSO8	log2 LFQ intensity TG42_1	log2 LFQ intensity TG42_2	log2 LFQ intensity TG42_3	log2 LFQ intensity TG42_4	log2 LFQ intensity TG42_5	log2 LFQ intensity TG42_6	log2 LFQ intensity TG42_7	log2 LFQ intensity TG42_8
[truncated: 2,847 more rows]

[truncated: 1 more sheets: Huh7 (D3_DMSO)]
